# Supplementary material for: Thiol-promoted intermolecular cyclization to synthesize 1,2,4-oxadiazoles including tioxazafen under transition metal-free conditions
Source: Royal Society of Chemistry journal article supplement (doi:10.1039/d3ob00770g), 2023-01-01
Supplement: d3ob00770g1.pdf [file d3ob00770g1.pdf]

## *Supporting Information*

### **Thiols-promoted intermolecular cyclization to synthesize 1,2,4-oxadiazoles including *Tioxazafen* under transition metal-free conditions**

Congcong Yan<sup>a</sup>, Min Zhang<sup>a</sup>, Jiaxin Li<sup>a</sup>, Jinli Zhang<sup>a,b\*</sup>, Yangjie Wu<sup>a,b</sup>

<sup>a</sup>*Green Catalysis Center, and College of Chemistry, Zhengzhou University, Zhengzhou 450001, P. R. China*

<sup>b</sup>*Henan Key Laboratory of Chemical Biology and Organic Chemistry; Key Laboratory of Applied Chemistry of Henan Universities, Zhengzhou University, Zhengzhou, 450052, P.R. China*

\*Corresponding author, E-mail: [jinli@zzu.edu.cn](mailto:jinli@zzu.edu.cn)

### **Table of Contents**

|                                                                                                  |    |
|--------------------------------------------------------------------------------------------------|----|
| 1. General Information.....                                                                      | 2  |
| 2. Experimental Procedure .....                                                                  | 2  |
| 2.1 Procedure for synthesis of amidoxime and its derivatives.....                                | 2  |
| 2.2 Procedure for synthesis of 1,2,4-oxadiazole and its derivatives.....                         | 2  |
| 3. Exploring the Mechanism.....                                                                  | 3  |
| 3.1 Exploring the Mechanism by high Resolution Mass Spectrometry Tracking Experiments .....      | 3  |
| 3.2 Exploring the Mechanism by pH detection .....                                                | 6  |
| 4. Characterization Data of Products .....                                                       | 7  |
| 5. Copies of <sup>1</sup> H, <sup>13</sup> C, <sup>19</sup> F NMR Spectra for the Products ..... | 21 |
| 6. References.....                                                                               | 83 |

## 1. General Information

$^1\text{H}$  NMR,  $^{13}\text{C}$  NMR,  $^{19}\text{F}$  NMR were recorded in  $\text{CDCl}_3$  at room temperature on the Bruker DPX-400 spectrometer (400 MHz, 101 MHz, 376 MHz). The chemical-shifts scale is based on internal TMS. Low-resolution mass spectra data were obtained by LC/MSD Trap XCT Melting points were measured using a WC-1 microscopic apparatus and are uncorrected. High-resolution mass spectra (HRMS) were recorded on Thermo Scientific Q Exactive. All reactions were monitored and post-processing by TLC with Qingdao GF<sub>254</sub> silica gel-coated plates. Aryl nitriles and benzyl mercaptans were purchased from commercial suppliers such as Aladdin or J&K Scientific and used without further purification unless otherwise noted. The amidoximes were synthesized according to the synthetic methods reported in the literature (See 2.1).

## 2. Experimental Procedure

### 2.1 Procedure for synthesis of amidoxime and its derivatives<sup>[1]</sup>

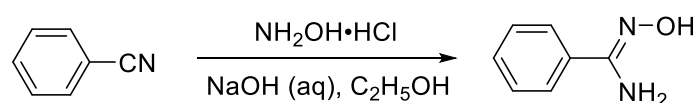

In a round-bottom flask, under magnetic stirring, aryl nitrile (15 mmol) was dissolved in ethanol (25 mL), and to the solution hydroxylamine hydrochloride (2.085 g, 30 mmol) and aqueous NaOH (2 equiv., 10 mL) were added. The mixture was stirred at 80 °C for 2 to 3 h, and the reaction was monitored by TLC. Then, the solvent was removed by rotary evaporation and water was added to the crude mixture (20 mL). The mixture was extracted with ethyl acetate (3 x 10 mL) and the organic layer was dried over anhydrous  $\text{Na}_2\text{SO}_4$  and filtered. The solvent was removed by rotary evaporation and the crude product was purified through flash column chromatography on silica gel using petroleum ether/ethyl acetate = (1/1), and dried under reduced pressure.

### 2.2 Procedure for synthesis of 1,2,4-oxadiazole and its derivatives

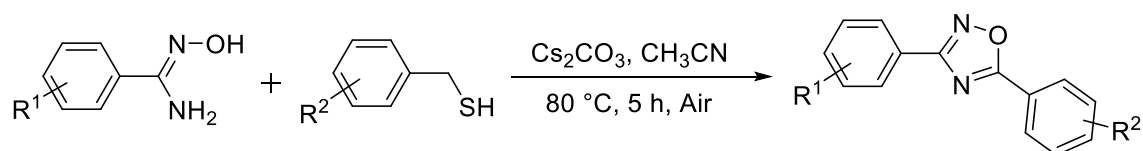

To a mixture of amidoxime (0.20 mmol), benzyl mercaptan (0.40 mmol),  $\text{Cs}_2\text{CO}_3$  (130.3 mg, 2.0 equiv.), and  $\text{CH}_3\text{CN}$  (1 mL) were added in a 25 mL screw-cap Schlenk test tube. Then the mixture was stirred at 80 °C for 5 h under air atmosphere. The progress of the reaction was monitored by TLC. After the reaction was completed, the reaction mixture was cooled to room temperature and then filtered with diatomite. The mixture was extracted with ethyl acetate (3 x 10 mL) and the combined organic phases were dried over anhydrous  $\text{Na}_2\text{SO}_4$  and the solvent was evaporated under vacuum. The residue was purified by column chromatography to give the corresponding products (petroleum ether/dichloromethane = 3/1 - 5/1, 18%-95%).

### 3. Exploring the Mechanism

#### 3.1 Exploring the Mechanism by high Resolution Mass Spectrometry Tracking

##### Experiments

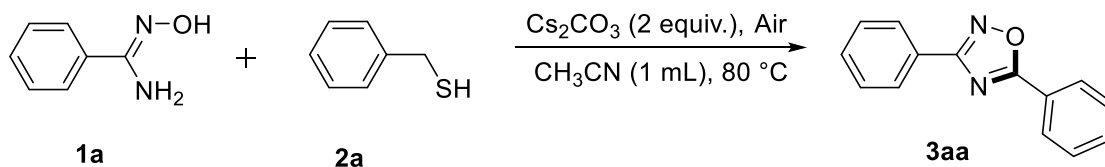

A mixture of **1a** (0.2 mmol, 27.2 mg) and **2a** (0.4 mmol, 48 $\mu$ l),  $\text{Cs}_2\text{CO}_3$  (130.3 mg), and  $\text{CH}_3\text{CN}$  (1.0 mL) was heated under an air atmosphere in a Schlenk tube at 80 °C. The reaction in sequence for 0.5 h, 1 h, 1.5 h, 2 h, 3 h, 4 h, and 5 h. After the reaction was finished, the reaction mixture was cooled to room temperature. The mixture was extracted with  $\text{CH}_2\text{Cl}_2$  (3 x 10 mL), the combined organic phases were dried over anhydrous  $\text{Na}_2\text{SO}_4$  and the solvent was evaporated under vacuum. The samples were detected by high resolution mass spectrometry. The test results are as follows.

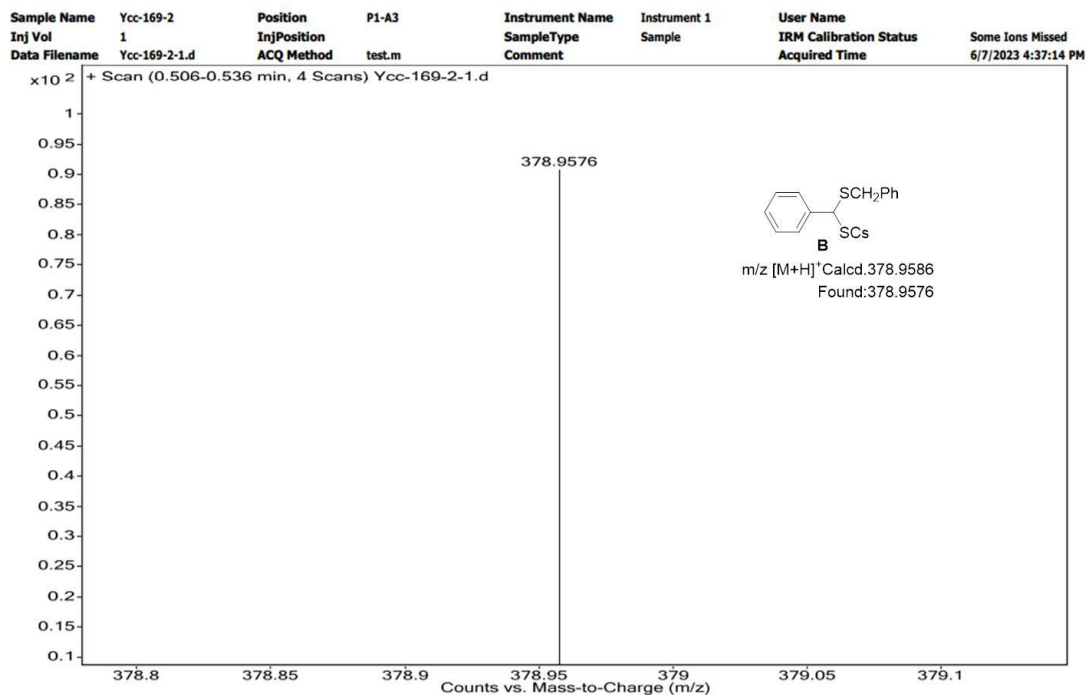

**Figure 1** The mass spectrum for **2 h** of the reaction solution of **1a** and **2a**

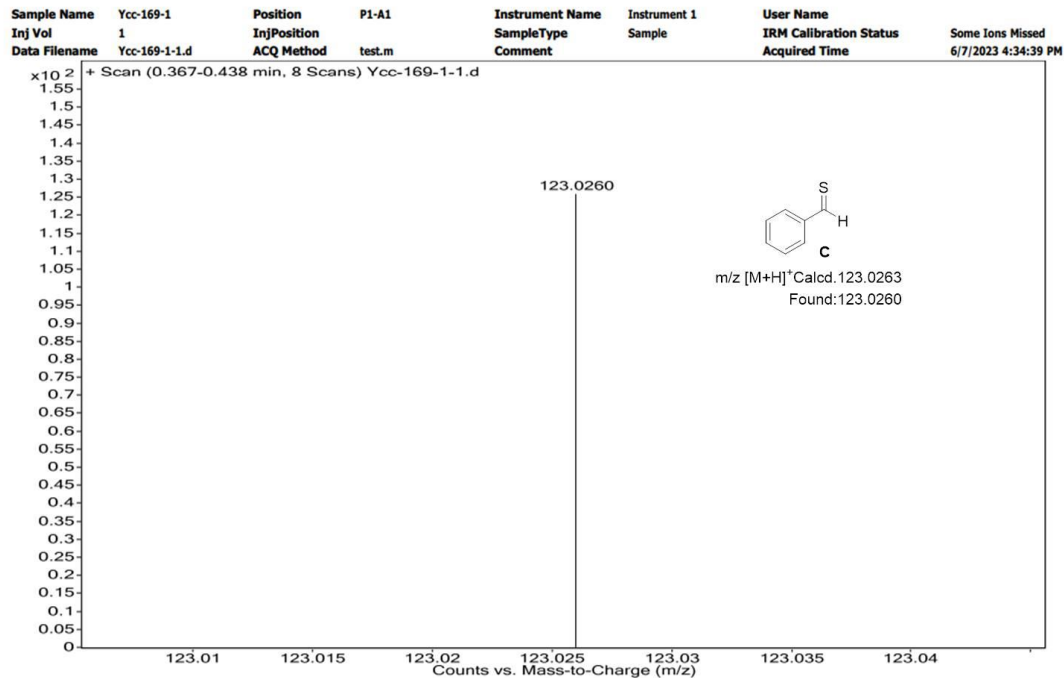

**Figure 2** The mass spectrum for **1 h** of the reaction solution of **1a** and **2a**

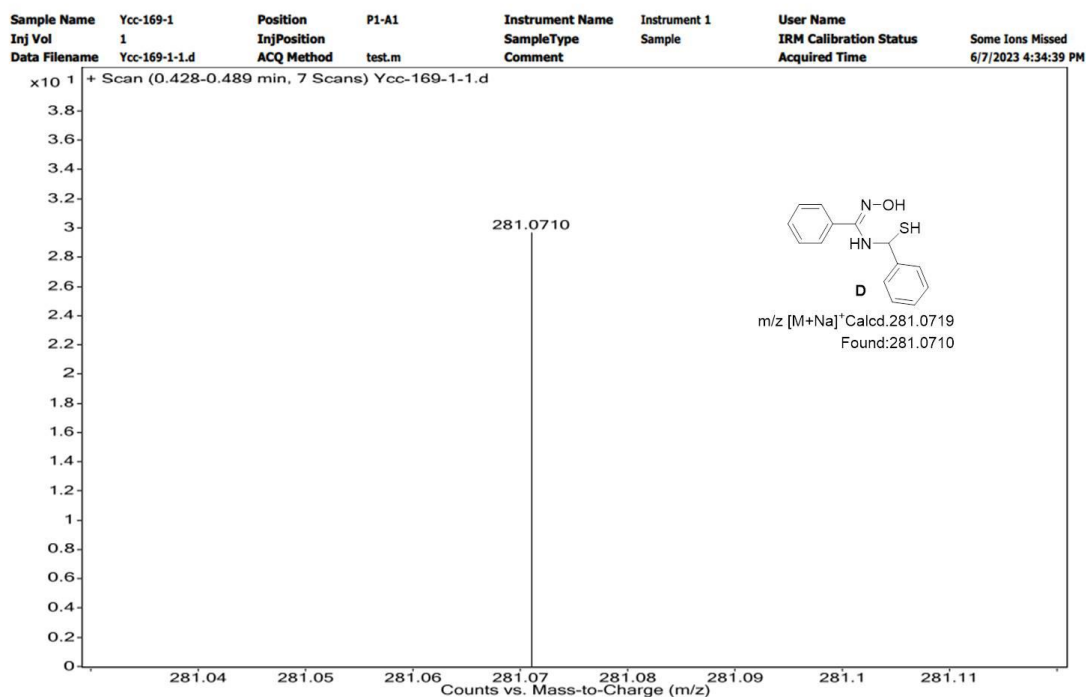

**Figure 3** The mass spectrum for **1 h** of the reaction solution of **1a** and **2a**

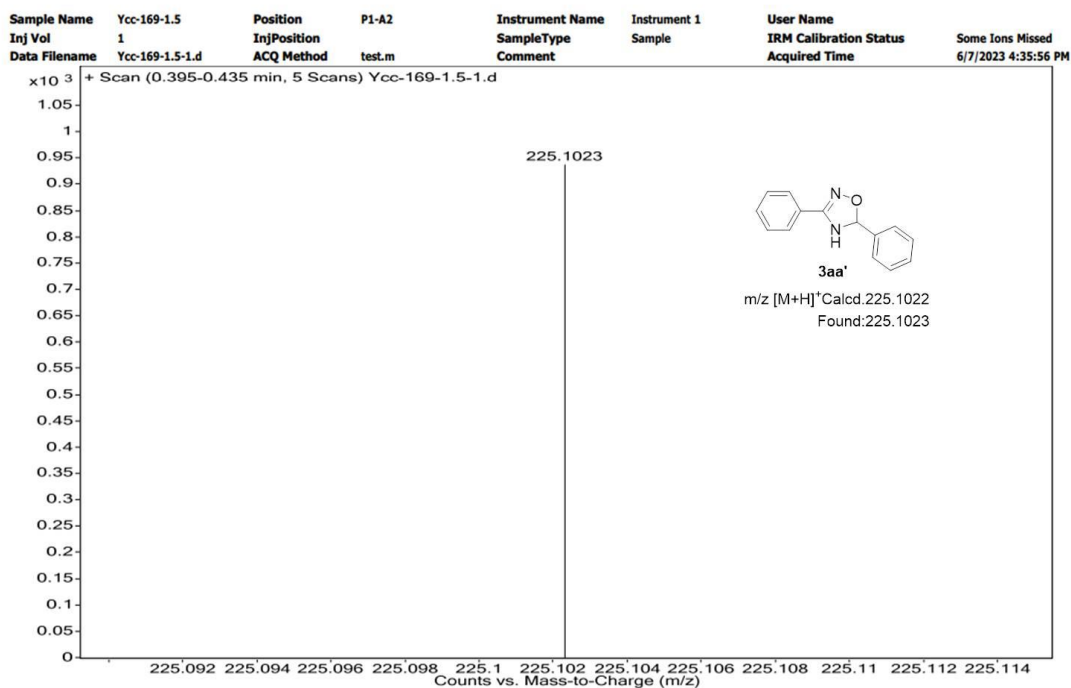

**Figure 4** The mass spectrum for **1.5 h** of the reaction solution of **1a** and **2a**

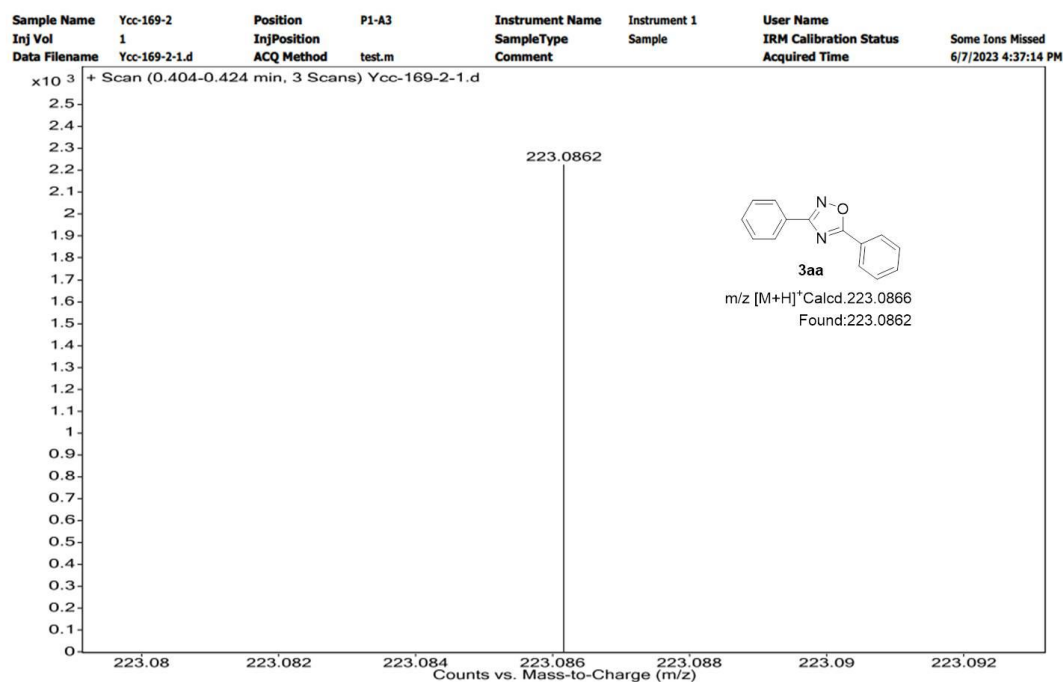

**Figure 5** The mass spectrum for **2 h** of the reaction solution of **1a** and **2a**

### 3.2 Exploring the Mechanism by pH detection

Mix benzyl thiol (**2a**, 0.4 mmol, 48  $\mu$ l),  $\text{Cs}_2\text{CO}_3$  (130.3 mg), and  $\text{CH}_3\text{CN}$  (1.0 mL) under an air atmosphere in a Schlenk tube. The pH of the mixed solution was detected to be 9, which further proved the possibility of producing intermediate **A**.

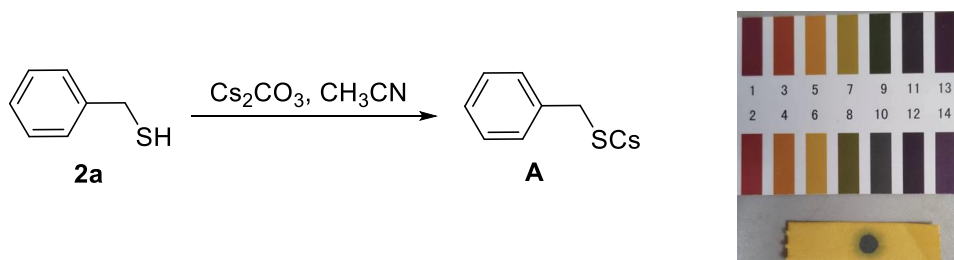

#### 4. Characterization Data of Products

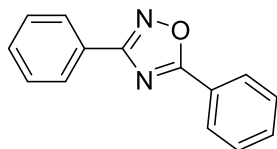

##### **3,5-diphenyl-1,2,4-oxadiazole (3aa)**<sup>[2]</sup>

White solid; 95% yield (42.2 mg); mp: 107.5-109.1 °C; <sup>1</sup>H NMR (400 MHz, CDCl<sub>3</sub>) δ 8.23-8.17 (m, 4H), 7.62-7.48 (m, 6H); <sup>13</sup>C NMR (100 MHz, CDCl<sub>3</sub>) δ 175.73, 168.99, 132.75, 131.21, 129.12, 128.87, 128.19, 127.55, 127.00, 124.34.

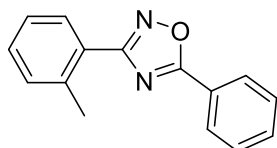

##### **5-phenyl-3-(*o*-tolyl)-1,2,4-oxadiazole (3ba)**<sup>[3]</sup>

White solid; 70% yield (33.1 mg); mp: 110.3-111.2 °C; <sup>1</sup>H NMR (400 MHz, CDCl<sub>3</sub>) δ 8.21 (m, 2H), 8.10-8.08 (m, 1H), 7.62-7.52 (m, 3H), 7.42-7.38 (m, 1H), 7.35-7.33 (m, 2H), 2.69 (s, 3H); <sup>13</sup>C NMR (100 MHz, CDCl<sub>3</sub>) δ 174.73, 169.60, 138.28, 132.69, 131.40, 130.60, 129.12, 128.19, 126.26, 126.10, 124.37, 22.15.

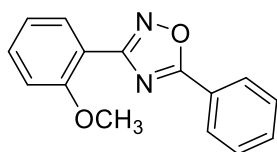

##### **3-(2-methoxyphenyl)-5-phenyl-1,2,4-oxadiazole (3ca)**<sup>[4]</sup>

White solid; 76% yield (38.4 mg); mp: 113.2-113.8 °C; <sup>1</sup>H NMR (400 MHz, CDCl<sub>3</sub>) δ 8.23-8.21 (m, 2H), 8.13-8.11 (m, 1H), 7.61-7.47 (m, 4H), 7.13-7.06 (m, 2H), 3.99 (s, 3H); <sup>13</sup>C NMR (100 MHz, CDCl<sub>3</sub>) δ 174.56, 167.46, 158.18, 132.61, 132.33, 131.44, 129.06, 128.20, 124.39, 120.71, 55.02.

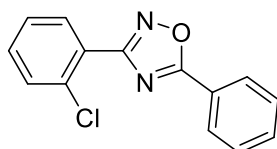

##### **3-(2-chlorophenyl)-5-phenyl-1,2,4-oxadiazole (3da)**<sup>[5]</sup>

White solid; 86% yield (44.1 mg); mp: 86.7-87.7 °C; <sup>1</sup>H NMR (400 MHz, CDCl<sub>3</sub>) δ 8.23-8.21 (m, 2H), 8.03-8.01 (m, 1H), 7.63-7.59 (m, 1H), 7.57-7.53 (m, 3H), 7.47-7.39 (m, 2H); <sup>13</sup>C NMR (100 MHz, CDCl<sub>3</sub>) δ 175.28, 167.79, 133.55, 132.90, 131.79, 131.72, 130.95, 129.16, 128.24, 126.92, 126.29, 124.09.

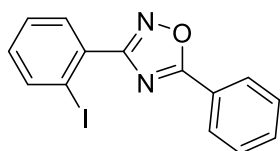

### 3-(2-iodophenyl)-5-phenyl-1,2,4-oxadiazole (3ea)

White solid; 66% yield (44.1 mg); mp: 68.3-68.9 °C;  $^1\text{H}$  NMR (400 MHz,  $\text{CDCl}_3$ )  $\delta$  8.24-8.21 (m, 2H), 8.06-8.04 (m, 1H), 7.83-7.80 (m, 1H), 7.64-7.51 (m, 3H), 7.49-7.47 (m, 1H), 7.21-7.17 (m, 1H);  $^{13}\text{C}$  NMR (100 MHz,  $\text{CDCl}_3$ )  $\delta$  175.47, 169.79, 140.90, 132.94, 132.23, 131.80, 131.45, 129.19, 128.26, 128.18, 124.12, 95.33; HRMS (m/z)  $[\text{M}+\text{H}]^+$  calculated for  $\text{C}_{14}\text{H}_9\text{IN}_2\text{O}$ : 348.9832; found: 348.9832.

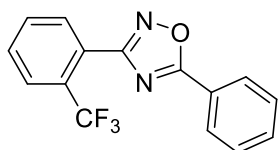

### 5-phenyl-3-(2-(trifluoromethyl)phenyl)-1,2,4-oxadiazole (3fa)

Colourless liquid; 76% yield (44.1mg);  $^1\text{H}$  NMR (400 MHz,  $\text{CDCl}_3$ )  $\delta$  8.23-8.20 (m, 2H), 7.88-7.85 (m, 2H), 7.71-7.60 (m, 3H), 7.57-7.53 (m, 2H);  $^{13}\text{C}$  NMR (100 MHz,  $\text{CDCl}_3$ )  $\delta$  175.68, 168.15, 132.99, 131.87 (d,  $J = 2.3$  Hz), 130.74, 129.52 (q,  $J = 32.1$  Hz) 129.19, 128.25, 126.92 (q,  $J = 5.3$  Hz), 125.86 (d,  $J = 1.9$  Hz), 123.98, 123.48 (q,  $J = 273.6$  Hz);  $^{19}\text{F}$  NMR (376 MHz,  $\text{CDCl}_3$ )  $\delta$  -58.70; HRMS (m/z)  $[\text{M}+\text{H}]^+$  calculated for  $\text{C}_{15}\text{H}_9\text{F}_3\text{N}_2\text{O}$ : 291.0740; found: 291.0740.

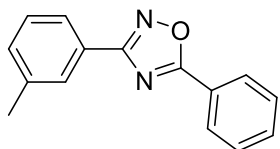

### 5-phenyl-3-(*m*-tolyl)-1,2,4-oxadiazole (3ga)<sup>[2]</sup>

White solid; 88% yield (41.5 mg); mp: 85.1-85.5 °C;  $^1\text{H}$  NMR (400 MHz,  $\text{CDCl}_3$ )  $\delta$  8.23-8.21 (m, 2H), 8.00-7.97 (m, 2H), 7.62-7.52 (m, 3H), 7.39 (t,  $J = 7.7$  Hz, 1H), 7.32 (d,  $J = 7.7$  Hz, 1H), 2.45 (s, 3H);  $^{13}\text{C}$  NMR (100 MHz,  $\text{CDCl}_3$ )  $\delta$  175.65, 169.09, 138.66, 132.72, 131.99, 129.11, 128.79, 128.18, 128.09, 126.84, 124.68, 124.36, 21.40.

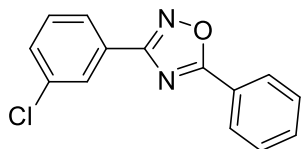

### 3-(3-chlorophenyl)-5-phenyl-1,2,4-oxadiazole (3ha)<sup>[5]</sup>

White solid; 90% yield (46.1 mg); mp: 102.1-103.2 °C;  $^1\text{H}$  NMR (400 MHz,  $\text{CDCl}_3$ )  $\delta$  8.21-8.17 (m, 3H), 8.07-8.04 (m, 1H), 7.63-7.60 (m, 1H), 7.56-7.52 (m, 2H),



7.50-7.47 (m, 1H), 7.43 (t,  $J = 7.7$  Hz, 1H);  $^{13}\text{C}$  NMR (100 MHz,  $\text{CDCl}_3$ )  $\delta$  175.98, 167.97, 134.96, 132.92, 131.23, 130.18, 129.16, 128.72, 128.20, 127.65, 125.58, 124.10.

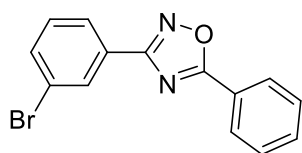

### 3-(3-bromophenyl)-5-phenyl-1,2,4-oxadiazole (3ia)<sup>[6]</sup>

White solid; 84% yield (50.3 mg); mp: 91.5-92.4 °C;  $^1\text{H}$  NMR (400 MHz,  $\text{CDCl}_3$ )  $\delta$  8.33 (t,  $J = 1.6$  Hz, 1H), 8.21-8.19 (m, 2H), 8.09 (d,  $J = 7.7$  Hz, 1H), 7.65-7.59 (m, 2H), 7.56-7.52 (m, 2H), 7.37 (t,  $J = 7.9$  Hz, 1H);  $^{13}\text{C}$  NMR (100 MHz,  $\text{CDCl}_3$ )  $\delta$  175.98, 167.84, 134.16, 132.93, 130.53, 130.42, 129.16, 128.94, 128.20, 126.03, 124.09, 122.96.

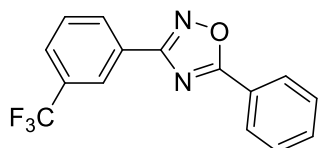

### 3-phenyl-3-(3-(trifluoromethyl)phenyl)-1,2,4-oxadiazole (3ja)<sup>[7]</sup>

White solid; 78% yield (45.2 mg); mp: 90.6-91.8 °C;  $^1\text{H}$  NMR (400 MHz,  $\text{CDCl}_3$ )  $\delta$  8.45 (s, 1H), 8.35 (d,  $J = 8.0$  Hz, 1H), 8.23-8.21 (m, 2H), 7.77 (d,  $J = 7.7$  Hz, 1H), 7.65-7.60 (m, 2H), 7.57-7.53 (m, 2H);  $^{13}\text{C}$  NMR (100 MHz,  $\text{CDCl}_3$ )  $\delta$  176.17, 167.94, 132.99, 131.46 (q,  $J = 33.1$  Hz), 130.62, 129.44, 129.18, 128.22, 127.89, 127.75 (q,  $J = 5.5$  Hz), 124.52 (q,  $J = 3.9$  Hz), 124.01, 123.81 (q,  $J = 273.2$  Hz);  $^{19}\text{F}$  NMR (376 MHz,  $\text{CDCl}_3$ )  $\delta$  -62.79.

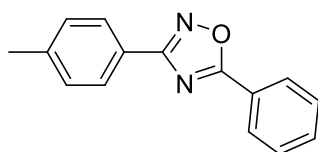

### 5-phenyl-3-(p-tolyl)-1,2,4-oxadiazole (3ka)<sup>[2]</sup>

White solid; 81% yield (38.2 mg); mp: 101.0-102.1 °C;  $^1\text{H}$  NMR (400 MHz,  $\text{CDCl}_3$ )  $\delta$  8.22-8.19 (m, 2H), 8.06 (d,  $J = 8.1$  Hz, 2H), 7.61-7.51 (m, 3H), 7.30 (d,  $J = 8.1$  Hz, 2H), 2.42 (s, 3H);  $^{13}\text{C}$  NMR (100 MHz,  $\text{CDCl}_3$ )  $\delta$  175.56, 168.99, 141.51, 132.68, 129.58, 129.09, 128.17, 127.47, 124.41, 124.17, 21.62.

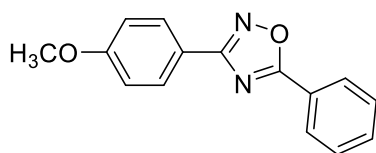

### 3-(4-methoxyphenyl)-5-phenyl-1,2,4-oxadiazole (3la)<sup>[3]</sup>

White solid; 74% yield (37.3 mg); mp: 101.4-102.1 °C; <sup>1</sup>H NMR (400 MHz, CDCl<sub>3</sub>) δ 8.21-8.19 (m, 2H), 8.11 (d, *J* = 8.7 Hz, 2H), 7.61-7.51 (m, 3H), 7.01 (d, *J* = 9.0 Hz, 2H), 3.87 (s, 3H); <sup>13</sup>C NMR (100 MHz, CDCl<sub>3</sub>) δ 165.44, 168.67, 161.94, 132.65, 129.14, 129.08, 128.15, 124.43, 119.45, 114.25, 55.40.

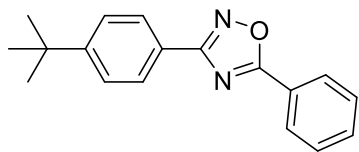

### 3-(4-(*tert*-butyl)phenyl)-5-phenyl-1,2,4-oxadiazole (3ma)<sup>[8]</sup>

White solid; 90% yield (50 mg); mp: 135.5-136.7 °C; <sup>1</sup>H NMR (400 MHz, CDCl<sub>3</sub>) δ 8.23-8.21 (m, 2H), 8.11-8.09 (m, 2H), 7.61-7.52 (m, 5H), 1.37 (s, 9H); <sup>13</sup>C NMR (100 MHz, CDCl<sub>3</sub>) δ 175.56, 168.94, 154.61, 132.67, 129.09, 128.19, 127.34, 125.84, 124.44, 124.15, 35.10, 31.22.

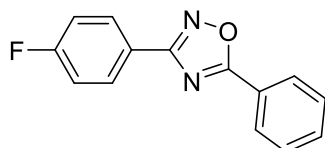

### 3-(4-fluorophenyl)-5-phenyl-1,2,4-oxadiazole (3na)<sup>[8]</sup>

White solid; 81% yield (39.1 mg); mp: 111.3-112.8 °C; <sup>1</sup>H NMR (400 MHz, CDCl<sub>3</sub>) δ 8.21-8.15 (m, 4H), 7.62-7.52 (m, 3H), 7.22-7.16 (m, 2H); <sup>13</sup>C NMR (100 MHz, CDCl<sub>3</sub>) δ 175.80, 168.15, 164.60 (d, *J* = 254.5 Hz), 132.82, 129.69 (d, *J* = 8.8 Hz), 129.13, 128.17, 124.21, 123.22 (d, *J* = 3.1 Hz), 116.04 (d, *J* = 22.1 Hz); <sup>19</sup>F NMR (376 MHz, CDCl<sub>3</sub>) δ -108.52.

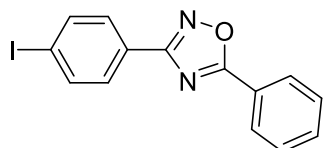

### 3-(4-iodophenyl)-5-phenyl-1,2,4-oxadiazole (3oa)

White solid; 91% yield (63.3 mg); mp: 126.4-126.8 °C; <sup>1</sup>H NMR (400 MHz, CDCl<sub>3</sub>) δ 8.21-8.19 (m, 2H), 7.91-7.84 (m, 4H), 7.63-7.59 (m, 1H), 7.57-7.53 (m, 2H); <sup>13</sup>C NMR (100 MHz, CDCl<sub>3</sub>) δ 175.93, 168.41, 138.12, 132.90, 129.16, 129.05, 128.20, 126.49, 124.14, 97.92; HRMS (*m/z*) [M+H]<sup>+</sup> calculated for C<sub>14</sub>H<sub>9</sub>IN<sub>2</sub>O: 348.9832; found: 348.9832.

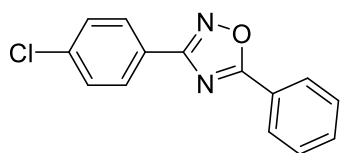

### 3-(4-chlorophenyl)-5-phenyl-1,2,4-oxadiazole (3pa)<sup>[8]</sup>

White solid; 86% yield (47.4 mg); mp: 101.1-101.5 °C; <sup>1</sup>H NMR (400 MHz, CDCl<sub>3</sub>) δ 8.21-8.19 (m, 2H), 8.11 (d, *J* = 8.7 Hz, 2H), 7.63-7.53 (m, 3H), 7.49-7.47 (m, 2H); <sup>13</sup>C NMR (100 MHz, CDCl<sub>3</sub>) δ 175.90, 168.17, 137.34, 132.88, 129.19, 129.15, 128.85, 128.19, 125.49, 124.15.

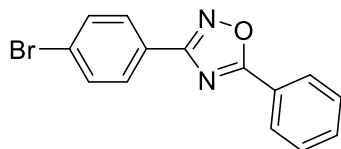

**3-(4-bromophenyl)-5-phenyl-1,2,4-oxadiazole (3qa)**<sup>[8]</sup>

White solid; 79% yield (24 mg); mp: 110.8-112.1 °C; <sup>1</sup>H NMR (400 MHz, CDCl<sub>3</sub>) δ 8.22-8.20 (m, 2H), 8.06-8.04 (m, 2H), 7.66-7.64 (m, 2H), 7.62-7.60 (m, 1H), 7.58-7.54 (m, 2H); <sup>13</sup>C NMR (100 MHz, CDCl<sub>3</sub>) δ 175.94, 168.27, 132.90, 132.16, 129.16, 129.04, 128.20, 125.94, 125.76, 124.14.

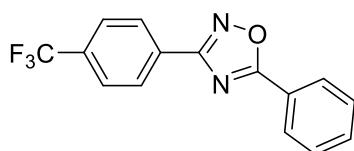

**5-phenyl-3-(4-(trifluoromethyl)phenyl)-1,2,4-oxadiazole (3ra)**<sup>[9]</sup>

White solid; 90% yield (52.2 mg); mp: 125.2-126.7 °C; <sup>1</sup>H NMR (400 MHz, CDCl<sub>3</sub>) δ 8.29 (d, *J* = 8.1 Hz, 2H), 8.22-8.20 (m, 2H), 7.76 (d, *J* = 8.1 Hz, 2H), 7.64-7.60 (m, 1H), 7.55 (t, *J* = 7.7 Hz, 2H); <sup>13</sup>C NMR (100 MHz, CDCl<sub>3</sub>) δ 176.18, 167.96, 133.01, 132.89 (d, *J* = 32.7 Hz), 130.39, 129.19, 128.21, 127.88, 125.84 (q, *J* = 8.1 Hz), 124.02, 123.82 (d, *J* = 272.1 Hz); <sup>19</sup>F NMR (376 MHz, CDCl<sub>3</sub>) δ -62.94

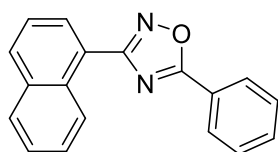

**3-(naphthalen-1-yl)-5-phenyl-1,2,4-oxadiazole (3sa)**<sup>[8]</sup>

White solid; 73% yield (48.4 mg); mp: 121.7-122.1 °C; <sup>1</sup>H NMR (400 MHz, CDCl<sub>3</sub>) δ 8.98 (d, *J* = 8.5 Hz, 1H), 8.36 (d, *J* = 7.3 Hz, 1H), 8.29-8.26 (m, 2H), 8.01 (d, *J* = 8.2 Hz, 1H), 7.93 (d, *J* = 8.2 Hz, 1H), 7.67-7.54 (m, 6H); <sup>13</sup>C NMR (100 MHz, CDCl<sub>3</sub>) δ 174.90, 169.43, 133.94, 132.82, 131.86, 130.74, 129.46, 129.18, 128.69, 128.29, 127.60, 126.35 (d, *J* = 8.2 Hz), 125.16, 124.31, 123.99.

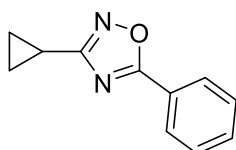

**3-cyclopropyl-5-phenyl-1,2,4-oxadiazole (3ta)**<sup>[10]</sup>

White solid; 51% yield (19.0 mg); mp: 35.8-36.3 °C; <sup>1</sup>H NMR (400 MHz, CDCl<sub>3</sub>) δ 8.09-8.07 (m, 2H), 7.59-7.54 (m, 1H), 7.52-7.48 (m, 2H), 2.18-2.12 (m, 1H), 1.15-1.06 (m, 4H); <sup>13</sup>C NMR (100 MHz, CDCl<sub>3</sub>) δ 175.14, 173.06, 132.51, 128.99, 128.03, 124.41, 7.76, 6.94.

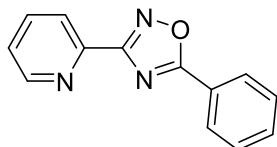**5-phenyl-3-(pyridin-2-yl)-1,2,4-oxadiazole (3ua)**<sup>[5]</sup>

Yellow solid; 91% yield (40.7 mg); mp: 131.4-131.7 °C; <sup>1</sup>H NMR (400 MHz, CDCl<sub>3</sub>) δ 8.85-8.84 (m, 1H), 8.29-8.27 (m, 2H), 8.23-8.21 (m, 1H), 7.90-7.85 (m, 1H), 7.64-7.59 (m, 1H), 7.57-7.53 (m, 2H), 7.47-7.43 (m, 1H); <sup>13</sup>C NMR (100 MHz, CDCl<sub>3</sub>) δ 176.47, 168.78, 150.44, 146.46, 137.06, 132.95, 129.10, 128.33, 125.53, 123.99, 123.26.

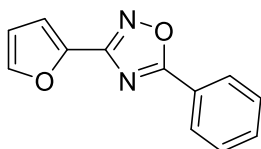**3-(furan-2-yl)-5-phenyl-1,2,4-oxadiazole (3va)**

White solid; 87% yield (36.9 mg); mp: 119.3-119.6 °C; <sup>1</sup>H NMR (400 MHz, CDCl<sub>3</sub>) δ 8.21-8.19 (m, 2H), 7.64 (d, *J* = 1.0 Hz, 1H), 7.63-7.59 (m, 1H), 7.54 (t, *J* = 7.9 Hz, 2H), 7.21 (d, *J* = 3.3 Hz, 1H), 6.59 (q, *J* = 1.7 Hz, 1H); <sup>13</sup>C NMR (100 MHz, CDCl<sub>3</sub>) δ 175.74, 161.90, 145.20, 142.40, 132.98, 129.13, 128.26, 123.87, 113.78, 111.87; HRMS (*m/z*) [*M*+*H*]<sup>+</sup> calculated for C<sub>12</sub>H<sub>8</sub>N<sub>2</sub>O<sub>2</sub>: 213.0659; found: 213.0660.

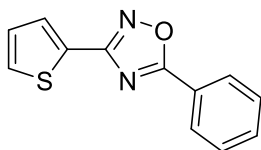**5-phenyl-3-(thiophen-2-yl)-1,2,4-oxadiazole (3wa)**<sup>[11]</sup>

White solid; 92% yield (42.0 mg); mp: 131.2-131.8 °C; <sup>1</sup>H NMR (400 MHz, CDCl<sub>3</sub>) δ 8.20-8.18 (m, 2H), 7.88-7.87 (m, 1H), 7.62-7.58 (m, 1H), 7.55-7.51 (m, 3H), 7.18-7.16 (m, 1H); <sup>13</sup>C NMR (100 MHz, CDCl<sub>3</sub>) δ 175.64, 165.05, 132.89, 129.64, 129.28, 129.12, 128.56, 128.24, 127.99, 124.03.

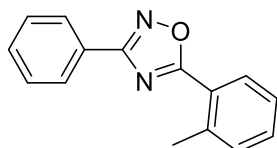

**3-phenyl-5-(*o*-tolyl)-1,2,4-oxadiazole (3ab)**<sup>[2]</sup>

White solid; 44% yield (23.1 mg); mp: 55.2-55.5 °C; <sup>1</sup>H NMR (400 MHz, CDCl<sub>3</sub>) δ 8.20-8.15 (m, 3H), 7.52-7.45 (m, 4H), 7.38-7.35 (m, 2H), 2.79 (s, 3H); <sup>13</sup>C NMR (100 MHz, CDCl<sub>3</sub>) δ 176.36, 168.61, 139.17, 132.21, 131.92, 131.15, 130.22, 128.86, 127.54, 127.14, 126.29, 123.49, 21.99.

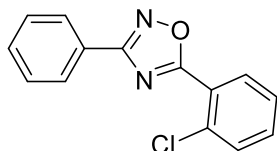**5-(2-chlorophenyl)-3-phenyl-1,2,4-oxadiazole (3ac)**<sup>[12]</sup>

Colourless liquid; 32% yield (25.7 mg); mp: 55.1-56.2 °C; <sup>1</sup>H NMR (400 MHz, CDCl<sub>3</sub>) δ 8.20-8.18 (m, 2H), 8.17-8.14 (m, 1H), 7.61-7.58 (m, 1H), 7.54-7.50 (m, 4H), 7.47-7.43 (m, 1H); <sup>13</sup>C NMR (100 MHz, CDCl<sub>3</sub>) δ 176.34, 168.72, 133.91, 133.14, 131.95, 131.47, 131.31, 128.91, 127.60, 127.11, 126.78, 123.70.

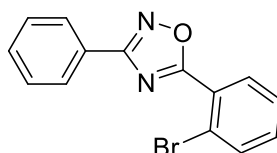**5-(2-bromophenyl)-3-phenyl-1,2,4-oxadiazole (3ad)**<sup>[8]</sup>

Colourless liquid; 29% yield (17.5 mg); mp: 60.8-62.0 °C; <sup>1</sup>H NMR (400 MHz, CDCl<sub>3</sub>) δ 8.20-8.18 (m, 2H), 8.10-8.07 (m, 1H), 7.81-7.79 (m, 1H), 7.54-7.48 (m, 4H), 7.46-7.41 (m, 1H); <sup>13</sup>C NMR (100 MHz, CDCl<sub>3</sub>) δ 176.89, 168.72, 134.81, 133.14, 132.17, 131.33, 128.91, 128.19, 127.60, 126.76, 125.81, 122.17.

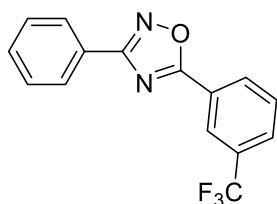**3-phenyl-5-(3-(trifluoromethyl)phenyl)-1,2,4-oxadiazole (3ae)**<sup>[13]</sup>

White solid; 78% yield (44.3 mg); mp: 94.4-95.2 °C; <sup>1</sup>H NMR (400 MHz, CDCl<sub>3</sub>) δ 8.49 (s, 1H), 8.39 (d, *J* = 7.7 Hz, 1H), 8.19-8.16 (m, 2H), 7.86 (d, *J* = 7.7 Hz, 1H), 7.69 (t, *J* = 7.7 Hz, 1H), 7.53-7.51 (m, 3H); <sup>13</sup>C NMR (100 MHz, CDCl<sub>3</sub>) δ 174.34, 169.18, 131.87 (q, *J* = 34.4 Hz), 131.44, 131.21, 129.84, 129.22 (q, *J* = 3.6 Hz), 128.94, 127.57, 126.58, 125.14 (q, *J* = 3.8 Hz), 123.49 (d, *J* = 272.54 Hz), 119.42; <sup>19</sup>F NMR (376 MHz, CDCl<sub>3</sub>) δ -62.93

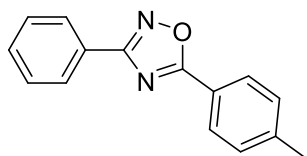

**3-phenyl-5-(*p*-tolyl)-1,2,4-oxadiazole (3af)<sup>[2]</sup>**

White solid; 75% yield (35.4 mg); mp: 115.6-116.7 °C; <sup>1</sup>H NMR (400 MHz, CDCl<sub>3</sub>) δ 8.18-8.16 (m, 2H), 8.09 (d, *J* = 8.1 Hz, 2H), 7.51-7.49 (m, 3H), 7.33 (d, *J* = 7.7 Hz, 2H), 2.43 (s, 3H); <sup>13</sup>C NMR (100 MHz, CDCl<sub>3</sub>) δ 175.86, 168.89, 143.50, 131.14, 129.83, 128.85, 128.15, 127.54, 127.10, 121.59, 21.79.

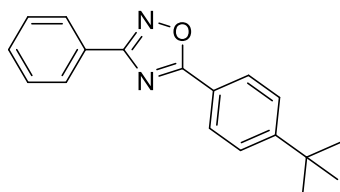

**5-(4-(*tert*-butyl)phenyl)-3-phenyl-1,2,4-oxadiazole (3ag)**

Colourless liquid; 67% yield (37.3 mg); <sup>1</sup>H NMR (400 MHz, CDCl<sub>3</sub>) δ 8.19-8.17 (m, 2H), 8.14 (d, *J* = 8.6 Hz, 2H), 7.56 (d, *J* = 8.6 Hz, 2H), 7.51-7.50 (m, 3H), 1.37 (s, 9H); <sup>13</sup>C NMR (100 MHz, CDCl<sub>3</sub>) δ 175.81, 168.92, 156.50, 131.14, 128.85, 128.04, 127.56, 127.12, 126.11, 121.55, 35.22, 31.12; HRMS (*m/z*) [M+H]<sup>+</sup> calculated for C<sub>18</sub>H<sub>18</sub>N<sub>2</sub>O: 279.1492; found: 279.1494.

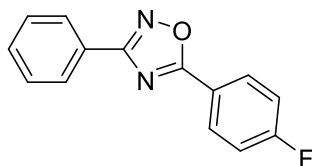

**5-(4-fluorophenyl)-3-phenyl-1,2,4-oxadiazole (3ai)<sup>[8]</sup>**

Yellow solid; 21% yield (10.0 mg); mp: 108.3-109.2 °C; <sup>1</sup>H NMR (400 MHz, CDCl<sub>3</sub>) δ 8.27-8.22 (m, 2H), 8.18-8.15 (m, 2H), 7.54-7.49 (m, 3H), 7.26-7.23 (m, 2H); <sup>13</sup>C NMR (100 MHz, CDCl<sub>3</sub>) δ 174.81, 169.02, 165.49 (d, *J* = 256.54 Hz), 131.28, 130.63 (d, *J* = 8.7 Hz), 128.89, 127.53, 126.84, 120.70 (d, *J* = 3.3 Hz), 116.51 (d, *J* = 22.3 Hz); <sup>19</sup>F NMR (376 MHz, CDCl<sub>3</sub>) δ -105.13.

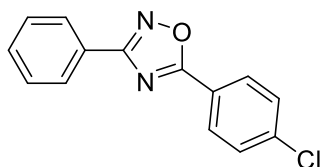

**5-(4-chlorophenyl)-3-phenyl-1,2,4-oxadiazole (3aj)<sup>[8]</sup>**

White solid; 60% yield (30.6 mg); mp: 125.6-126.4 °C; <sup>1</sup>H NMR (400 MHz, CDCl<sub>3</sub>) δ 8.20-8.18 (m, 2H), 8.17-8.14 (m, 1H); <sup>13</sup>C NMR (100 MHz, CDCl<sub>3</sub>) δ 174.80,

169.05, 139.19, 131.32, 129.53, 129.46, 128.90, 127.53, 126.77, 122.77.

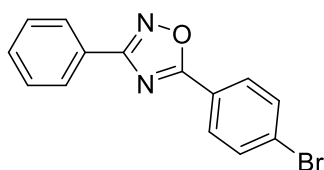

**5-(4-bromophenyl)-3-phenyl-1,2,4-oxadiazole (3ak)**<sup>[14]</sup>

White solid; 43% yield (25.8 mg); mp: 116.8-118.1 °C; <sup>1</sup>H NMR (400 MHz, CDCl<sub>3</sub>) δ 8.17-8.14 (m, 2H), 8.09-8.06 (m, 2H), 7.71-7.68 (m, 2H), 7.53-7.48 (m, 3H); <sup>13</sup>C NMR (100 MHz, CDCl<sub>3</sub>) δ 174.91, 169.08, 132.51, 131.33, 129.57, 128.91, 127.75, 127.54, 126.75, 123.20.

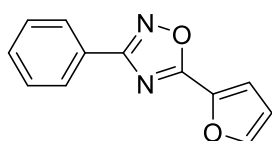

**5-(furan-2-yl)-3-phenyl-1,2,4-oxadiazole (3al)**<sup>[2]</sup>

Yellow solid; 76% yield (32.2 mg); mp: 99.1-100.2 °C; <sup>1</sup>H NMR (400 MHz, CDCl<sub>3</sub>) δ 8.18-8.15 (m, 2H), 7.72 (s, 1H), 7.53-7.49 (m, 3H), 7.38 (d, *J* = 3.4 Hz, 1H), 6.66-6.65 (m, 1H); <sup>13</sup>C NMR (100 MHz, CDCl<sub>3</sub>) δ 168.70, 167.60, 146.74, 140.16, 131.38, 128.88, 127.63, 126.49, 116.64, 112.54.

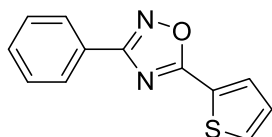

**3-phenyl-5-(thiophen-2-yl)-1,2,4-oxadiazole (3am)**<sup>[2]</sup>

White solid; 56% yield (25.5 mg); mp: 106.7-107.2 °C; <sup>1</sup>H NMR (400 MHz, CDCl<sub>3</sub>) δ 8.16-8.14 (m, 2H), 7.96 (dd, *J* = 1.1, 3.8 Hz, 1H), 7.65 (dd, *J* = 1.1, 5.0 Hz, 1H), 7.53-7.48 (m, 3H), 7.23-7.21 (m, 1H); <sup>13</sup>C NMR (100 MHz, CDCl<sub>3</sub>) δ 171.37, 168.87, 131.96, 131.89, 131.27, 128.85, 128.52, 127.59, 126.71, 125.92.

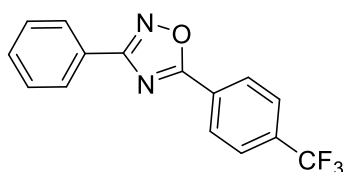

**3-phenyl-5-(4-(trifluoromethyl)phenyl)-1,2,4-oxadiazole (3ao)**<sup>[8]</sup>

White solid; 64% yield (37.3mg); mp: 101.0-102.0 °C; <sup>1</sup>H NMR (400 MHz, CDCl<sub>3</sub>) δ 8.33 (d, *J* = 8.2 Hz, 2H), 8.18-8.16 (m, 2H), 7.81 (d, *J* = 8.4 Hz, 2H), 7.54-7.49 (m, 3H); <sup>13</sup>C NMR (100 MHz, CDCl<sub>3</sub>) 174.37, 169.23, 134.25 (q, *J* = 32.8 Hz), 131.44,

128.94, 128.55 127.56, 127.44, 126.59, 126.16 (q,  $J = 3.8$  Hz), 123.52 (q,  $J = 271.7$  Hz);  $^{19}\text{F}$  NMR (376 MHz,  $\text{CDCl}_3$ )  $\delta$  -63.19.

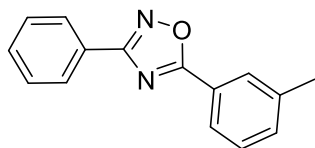

**3-phenyl-5-(*m*-tolyl)-1,2,4-oxadiazole (3an)**<sup>[2]</sup>

White solid; 73% yield (34.5 mg); mp: 71.2-72.0 °C;  $^1\text{H}$  NMR (400 MHz,  $\text{CDCl}_3$ )  $\delta$  8.19-8.16 (m, 2H), 8.03-7.80 (m, 2H), 7.51-7.47 (m, 3H), 7.44-7.38 (m, 2H), 2.45 (s, 3H);  $^{13}\text{C}$  NMR (100 MHz,  $\text{CDCl}_3$ )  $\delta$  175.92, 168.93, 139.03, 133.56, 131.16, 129.02, 128.86 128.68, 127.54, 127.05, 125.33, 124.21, 21.34.

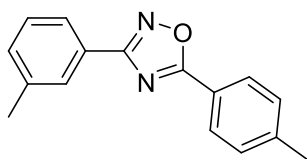

**3-(*m*-tolyl)-5-(*p*-tolyl)-1,2,4-oxadiazole (3gf)**<sup>[3]</sup>

Yellow solid solid; 72% yield (43.1 mg); mp: 123.7-124.5 °C;  $^1\text{H}$  NMR (400 MHz,  $\text{CDCl}_3$ )  $\delta$  8.10 (d,  $J = 8.2$  Hz, 2H), 7.99-7.96 (m, 2H), 7.39 (t,  $J = 7.5$  Hz, 1H), 7.33 (t,  $J = 8.2$  Hz, 3H), 2.44 (s, 6H);  $^{13}\text{C}$  NMR (100 MHz,  $\text{CDCl}_3$ )  $\delta$  175.79, 168.99, 143.46, 138.62, 131.92, 129.81, 128.76, 128.15, 128.07, 126.94, 124.66, 121.63, 21.78, 21.39.

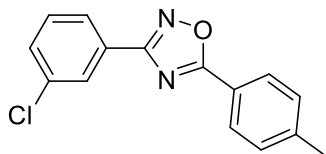

**3-(3-chlorophenyl)-5-(*p*-tolyl)-1,2,4-oxadiazole (3hf)**<sup>[15]</sup>

White solid; 62% yield (44.4 mg); mp: 103.8-104.2 °C;  $^1\text{H}$  NMR (400 MHz,  $\text{CDCl}_3$ )  $\delta$  8.17 (t,  $J = 1.6$  Hz, 1H), 8.08 (d,  $J = 8.1$  Hz, 2H), 8.06-8.03 (m, 1H), 7.50-7.47 (m, 1H), 7.43 (t,  $J = 7.7$  Hz, 1H), 7.34 (d,  $J = 8.1$  Hz, 2H), 2.45 (s, 3H);  $^{13}\text{C}$  NMR (100 MHz,  $\text{CDCl}_3$ )  $\delta$  176.13, 167.89, 143.73, 134.93, 131.16, 130.16, 129.87, 128.83, 128.17, 127.65, 125.57, 121.37, 21.80.

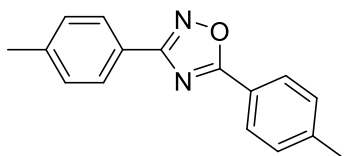

**3,5-di-*p*-tolyl-1,2,4-oxadiazole (3kf)**<sup>[3]</sup>

White solid; 68% yield (43.1 mg); mp: 135.1-135.7 °C;  $^1\text{H}$  NMR (400 MHz,  $\text{CDCl}_3$ )  $\delta$  8.07 (q,  $J = 8.1$  Hz, 4H), 7.34-7.29 (m, 4H), 2.42 (d,  $J = 6.8$  Hz, 6H);  $^{13}\text{C}$  NMR (100 MHz,  $\text{CDCl}_3$ )  $\delta$  175.69, 168.89, 143.40, 141.42, 129.79, 129.55, 128.13, 127.45,



124.27, 121.67, 21.77, 21.61.

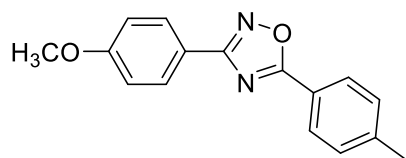

**3-(4-methoxyphenyl)-5-(p-tolyl)-1,2,4-oxadiazole (3lf)**<sup>[16]</sup>

White solid; 68% yield (43.6 mg); mp: 113.4-113.8 °C; <sup>1</sup>H NMR (400 MHz, CDCl<sub>3</sub>) δ 8.09 (t, *J* = 8.7 Hz, 4H), 7.33 (d, *J* = 8.1 Hz, 2H), 7.00 (d, *J* = 9.0 Hz, 2H), 3.87 (s, 3H), 2.44 (s, 3H); <sup>13</sup>C NMR (100 MHz, CDCl<sub>3</sub>) δ 175.58, 168.58, 161.89, 143.37, 129.78, 129.12, 128.12, 121.70, 119.56, 114.22, 55.39, 21.77.

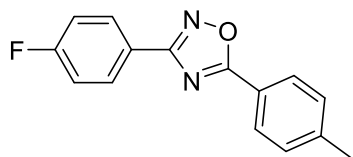

**3-(4-fluorophenyl)-5-(p-tolyl)-1,2,4-oxadiazole (3nf)**<sup>[17]</sup>

White solid; 74% yield (37.5 mg); mp: 120.1-120.4 °C; <sup>1</sup>H NMR (400 MHz, CDCl<sub>3</sub>) δ 8.18-8.14 (m, 2H), 8.08 (d, *J* = 8.2 Hz, 2H), 7.34 (d, *J* = 7.9 Hz, 2H), 7.21-7.15 (m, 2H), 3.09 (s, 3H); <sup>13</sup>C NMR (100 MHz, CDCl<sub>3</sub>) δ 175.94, 168.05, 164.56 (d, *J* = 250.7 Hz), 143.60, 129.83, 129.66 (d, *J* = 8.5 Hz), 128.13, 123.33 (d, *J* = 3.1 Hz), 121.47, 116.00 (d, *J* = 22.0 Hz), 21.77; <sup>19</sup>F NMR (376 MHz, CDCl<sub>3</sub>) δ -108.68.

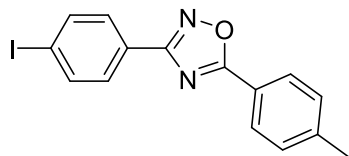

**3-(4-iodophenyl)-5-(p-tolyl)-1,2,4-oxadiazole (3of)**

White solid; 76% yield (23.1 mg); mp: 144.8-145.2 °C; <sup>1</sup>H NMR (400 MHz, CDCl<sub>3</sub>) δ 8.08 (d, *J* = 8.1 Hz, 2H), 7.90-7.83 (m, 4H), 7.34 (d, *J* = 8.1 Hz, 2H), 2.45 (s, 3H); <sup>13</sup>C NMR (100 MHz, CDCl<sub>3</sub>) δ 176.06, 168.32, 143.69, 138.08, 129.86, 129.04, 128.16, 126.60, 121.40, 97.82, 21.80; HRMS (m/z) [M+H]<sup>+</sup> calculated for C<sub>15</sub>H<sub>11</sub>IN<sub>2</sub>O: 362.9989; found: 362.9988.

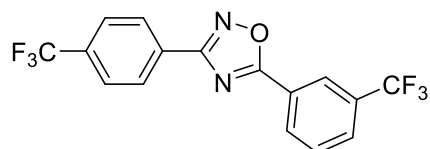

**5-(3-(trifluoromethyl)phenyl)-3-(4-(trifluoromethyl)phenyl)-1,2,4-oxadiazole (3re)**

White solid; 98% yield (45.7 mg); mp: 104.2-104.7 °C; <sup>1</sup>H NMR (400 MHz, CDCl<sub>3</sub>) δ 8.49 (s, 1H), 8.39 (d, *J* = 7.9 Hz, 1H), 8.30 (d, *J* = 8.2 Hz, 2H), 7.89 (d, *J* = 7.8 Hz, 1H), 7.79 (d, *J* = 8.2 Hz, 2H), 7.73 (t, *J* = 7.8 Hz, 1H); <sup>13</sup>C NMR (100 MHz, CDCl<sub>3</sub>) δ

174.84, 168.20, 133.18 (q,  $J = 32.5$  Hz), 132.02 (q,  $J = 33.2$  Hz), 131.26, 129.96, 129.51 (q,  $J = 3.6$  Hz), 128.71, 127.95, 125.95 (q,  $J = 3.7$  Hz), 125.21 (q,  $J = 4.0$  Hz), 124.83, 123.78 (q,  $J = 271.3$  Hz), 123.45 (q,  $J = 271.9$  Hz);  $^{19}\text{F}$  NMR (376 MHz,  $\text{CDCl}_3$ )  $\delta$  -62.99, -63.03; HRMS (m/z)  $[\text{M}+\text{H}]^+$  calculated for  $\text{C}_{16}\text{H}_8\text{F}_6\text{N}_2\text{O}$ : 359.0614; found: 359.0612.

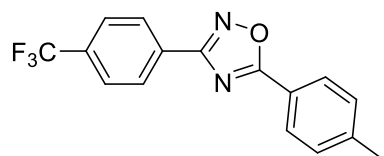

### 3-(*p*-tolyl)-3-(4-(trifluoromethyl)phenyl)-1,2,4-oxadiazole (3rf)<sup>[19]</sup>

White solid; 72% yield (49.2 mg); mp: 107.2-107.7 °C;  $^1\text{H}$  NMR (400 MHz,  $\text{CDCl}_3$ )  $\delta$  8.29 (d,  $J = 8.1$  Hz, 2H), 8.10 (d,  $J = 8.4$  Hz, 2H), 7.76 (d,  $J = 8.1$  Hz, 2H), 7.36 (d,  $J = 8.1$  Hz, 2H), 2.46 (s, 3H);  $^{13}\text{C}$  NMR (100 MHz,  $\text{CDCl}_3$ )  $\delta$  176.33, 167.88, 143.85, 132.83 (q,  $J = 32.0$  Hz), 130.51, 129.90, 128.19, 127.87, 125.82 (q,  $J = 3.7$  Hz), 123.83 (q,  $J = 272.3$  Hz), 121.29, 21.80;  $^{19}\text{F}$  NMR (376 MHz,  $\text{CDCl}_3$ )  $\delta$  -62.94.

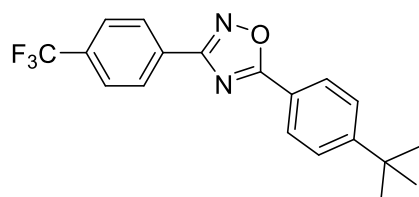

### 5-(4-(*tert*-butyl)phenyl)-3-(4-(trifluoromethyl)phenyl)-1,2,4-oxadiazole (3rg)

White solid; 69% yield (58.8 mg); mp: 103.2-103.7 °C;  $^1\text{H}$  NMR (400 MHz,  $\text{CDCl}_3$ )  $\delta$  8.30 (d,  $J = 7.9$  Hz, 2H), 8.14 (d,  $J = 8.5$  Hz, 2H), 7.76 (d,  $J = 8.2$  Hz, 2H), 7.59-7.57 (m, 2H), 1.38 (s, 9H);  $^{13}\text{C}$  NMR (100 MHz,  $\text{CDCl}_3$ )  $\delta$  176.28, 167.91, 156.85, 132.83 (q,  $J = 32.3$  Hz), 130.53, 128.08, 127.90, 126.19, 125.82 (q,  $J = 3.6$  Hz), 123.84 (d,  $J = 273.7$  Hz), 121.23, 35.26, 31.09;  $^{19}\text{F}$  NMR (376 MHz,  $\text{CDCl}_3$ )  $\delta$  -62.93; HRMS (m/z)  $[\text{M}+\text{H}]^+$  calculated for  $\text{C}_{19}\text{H}_{17}\text{F}_3\text{N}_2\text{O}$ : 347.1366; found: 347.1365.

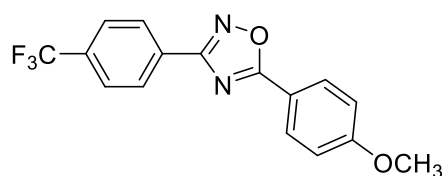

### 5-(4-methoxyphenyl)-3-(4-(trifluoromethyl)phenyl)-1,2,4-oxadiazole (3rh)<sup>[7]</sup>

White solid; 78% yield (49.9 mg); mp: 142.9-143.4 °C;  $^1\text{H}$  NMR (400 MHz,  $\text{CDCl}_3$ )  $\delta$  8.27 (d,  $J = 8.0$  Hz, 2H), 8.15 (d,  $J = 9.0$  Hz, 2H), 7.75 (d,  $J = 8.3$  Hz, 2H), 7.03 (d,

$J = 8.6$  Hz, 2H), 3.90 (s, 3H);  $^{13}\text{C}$  NMR (100 MHz,  $\text{CDCl}_3$ )  $\delta$  176.04, 167.79, 163.37, 132.76 (q,  $J = 32.3$  Hz), 130.58, 130.13, 127.84, 125.78 (q,  $J = 3.8$  Hz), 123.80 (q,  $J = 272.3$  Hz), 116.53, 114.58, 55.53;  $^{19}\text{F}$  NMR (376 MHz,  $\text{CDCl}_3$ )  $\delta$  -62.93.

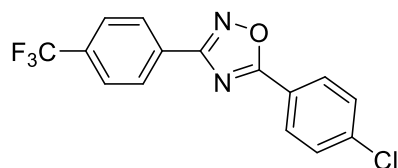

**5-(4-chlorophenyl)-3-(4-(trifluoromethyl)phenyl)-1,2,4-oxadiazole (3rj)**<sup>[18]</sup>

White solid; 58% yield (37.6 mg); mp: 121.5-122.1 °C;  $^1\text{H}$  NMR (400 MHz,  $\text{CDCl}_3$ )  $\delta$  8.27 (d,  $J = 8.2$  Hz, 2H), 8.16-8.13 (m, 2H), 7.76 (d,  $J = 8.2$  Hz, 2H), 7.55-7.52 (m, 2H);  $^{13}\text{C}$  NMR (100 MHz,  $\text{CDCl}_3$ )  $\delta$  175.26, 168.03, 139.52, 133.01 (q,  $J = 32.4$  Hz), 130.15, 129.62, 129.48, 127.87, 125.88 (q,  $J = 3.7$  Hz), 123.78 (q,  $J = 273.8$  Hz), 122.43.  $^{19}\text{F}$  NMR (376 MHz,  $\text{CDCl}_3$ )  $\delta$  -62.98.

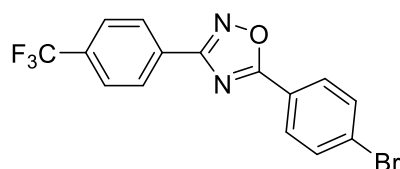

**5-(4-bromophenyl)-3-(4-(trifluoromethyl)phenyl)-1,2,4-oxadiazole (3rk)**

White solid; 44% yield (32 mg); mp: 128.6-128.9 °C;  $^1\text{H}$  NMR (400 MHz,  $\text{CDCl}_3$ )  $\delta$  8.28 (d,  $J = 7.9$  Hz, 2H), 8.09-8.06 (m, 2H), 7.77 (d,  $J = 8.2$  Hz, 2H), 7.72-7.69 (m, 2H);  $^{13}\text{C}$  NMR (100 MHz,  $\text{CDCl}_3$ )  $\delta$  175.38, 168.06, 133.03 (q,  $J = 32.4$  Hz), 132.60, 130.13, 129.58, 128.08, 127.88, 125.89 (q,  $J = 3.7$  Hz), 123.77 (d,  $J = 271.9$  Hz), 122.86.  $^{19}\text{F}$  NMR (376 MHz,  $\text{CDCl}_3$ )  $\delta$  -62.98; HRMS (m/z)  $[\text{M}+\text{H}]^+$  calculated for  $\text{C}_{15}\text{H}_8\text{BrF}_3\text{N}_2\text{O}$ : 368.9845; found: 368.9845.

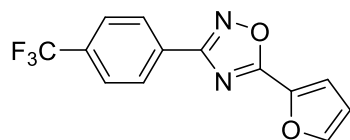

**5-(furan-2-yl)-3-(4-(trifluoromethyl)phenyl)-1,2,4-oxadiazole (3rl)**

White solid; 77% yield (36.4 mg); mp: 104.9-105.3 °C;  $^1\text{H}$  NMR (400 MHz,  $\text{CDCl}_3$ )  $\delta$  8.29 (d,  $J = 8.2$  Hz, 2H), 7.78-7.74 (m, 3H), 7.40 (d,  $J = 3.5$  Hz, 1H), 6.67 (q,  $J = 1.7$  Hz, 1H);  $^{13}\text{C}$  NMR (100 MHz,  $\text{CDCl}_3$ )  $\delta$  167.98, 167.70, 147.00, 139.89, 133.06 (q,  $J = 32.4$  Hz), 129.91, 127.97, 125.87 (q,  $J = 3.7$  Hz), 125.12 (q,  $J = 272.4$  Hz), 117.05, 112.64;  $^{19}\text{F}$  NMR (376 MHz,  $\text{CDCl}_3$ )  $\delta$  -63.01; HRMS (m/z)  $[\text{M}+\text{H}]^+$

calculated for  $C_{13}H_7F_3N_2O_2$ : 281.0532; found: 281.0533.

## 5. Copies of $^1\text{H}$ , $^{13}\text{C}$ , $^{19}\text{F}$ NMR Spectra for the Products

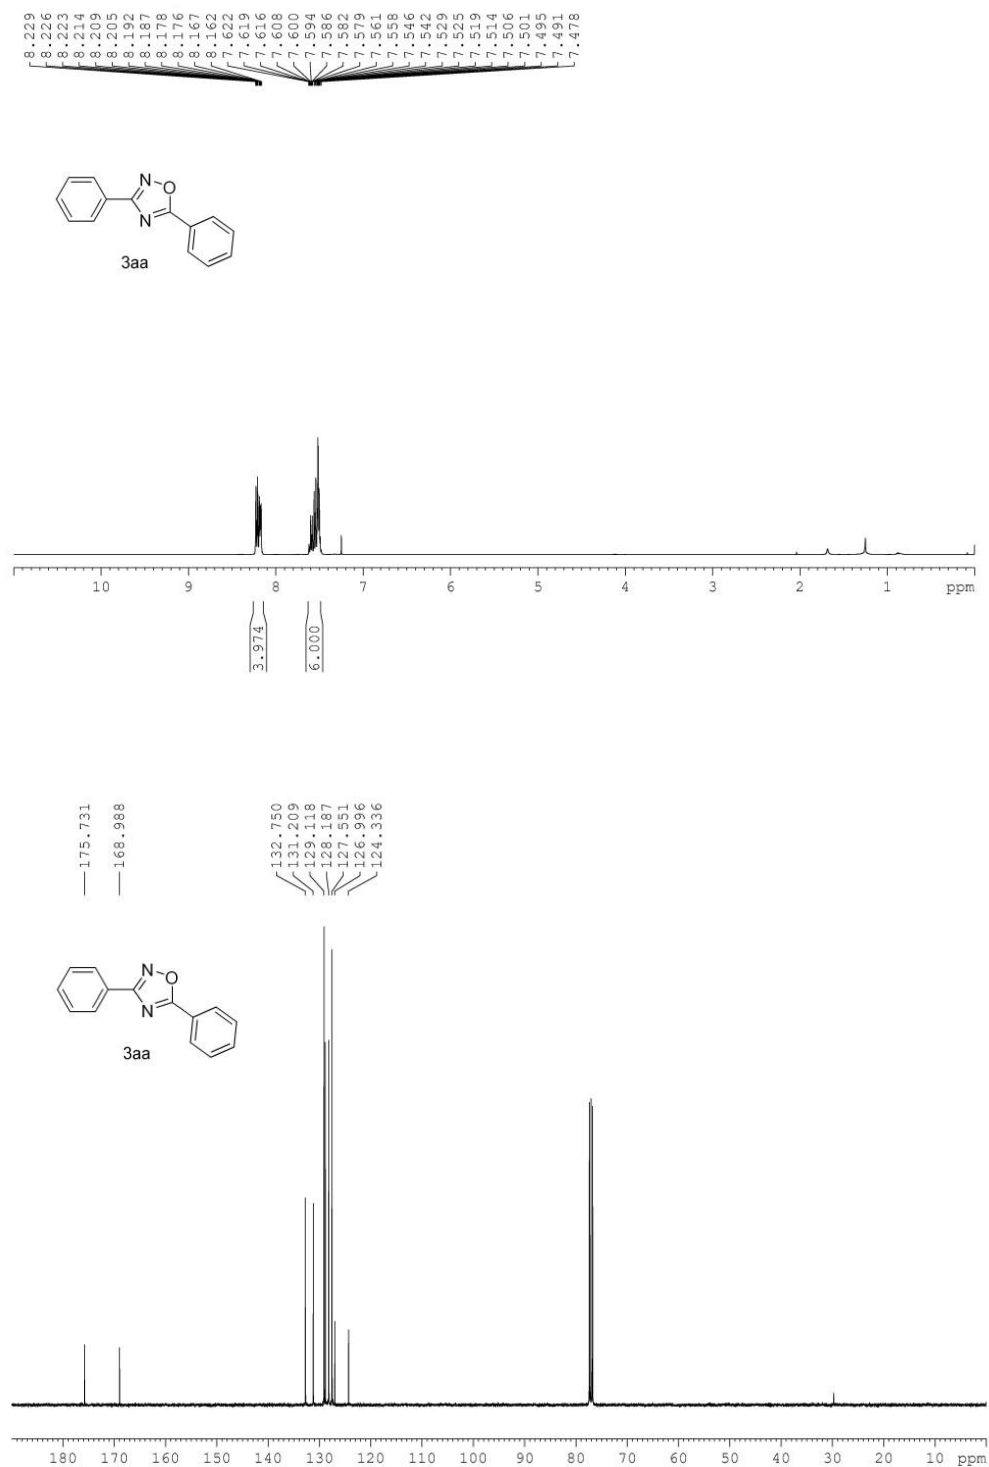

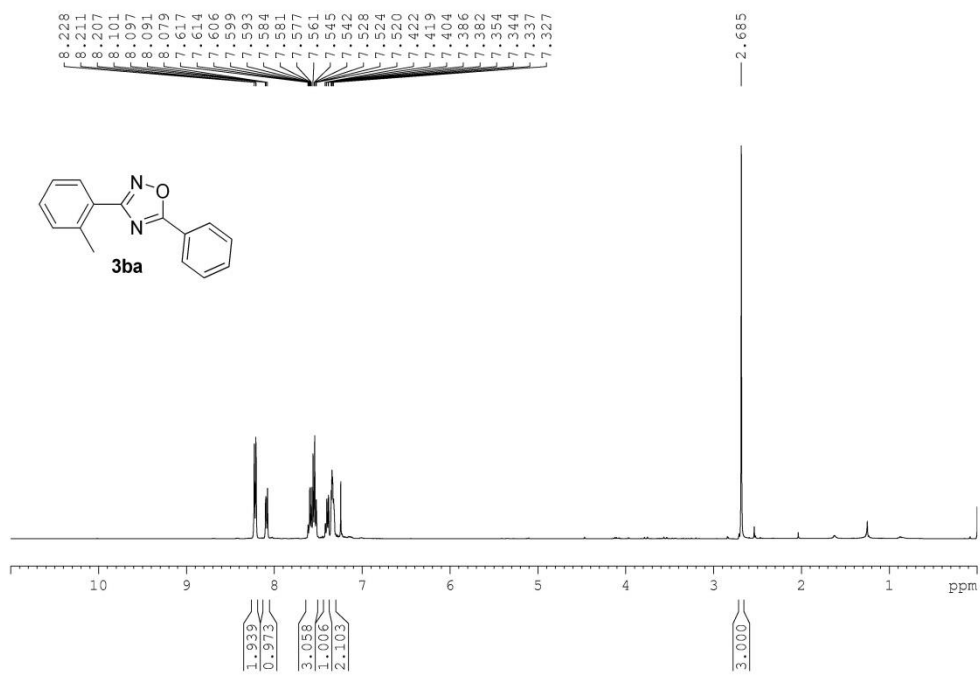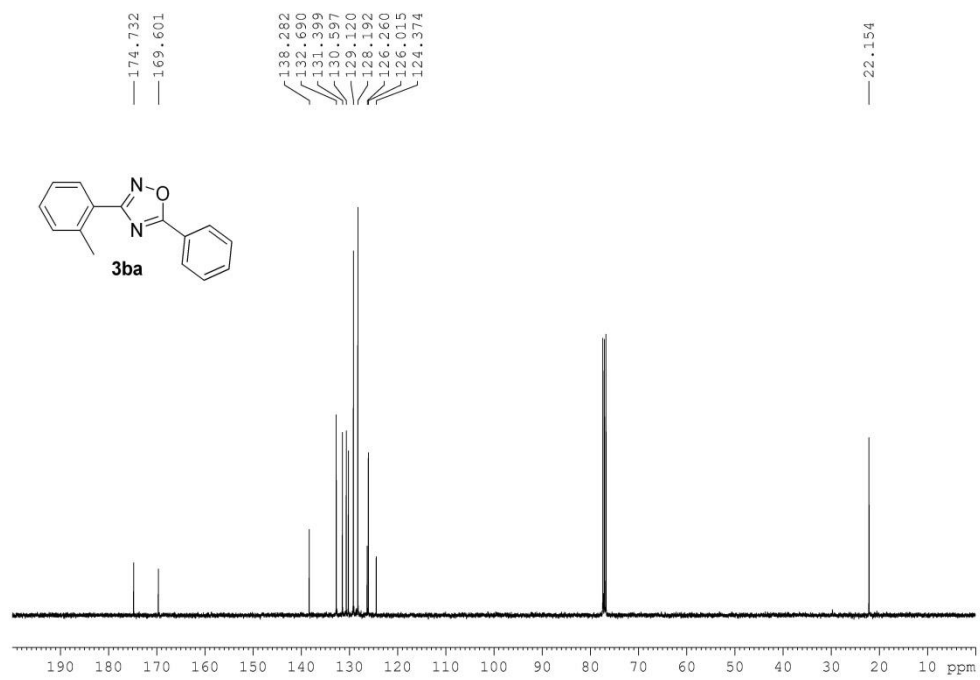

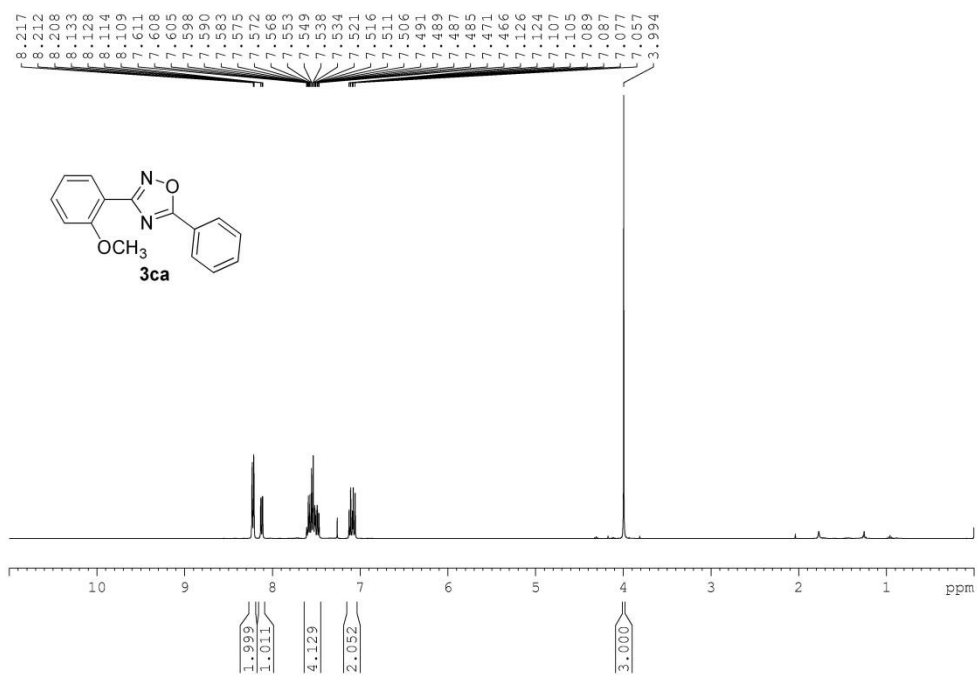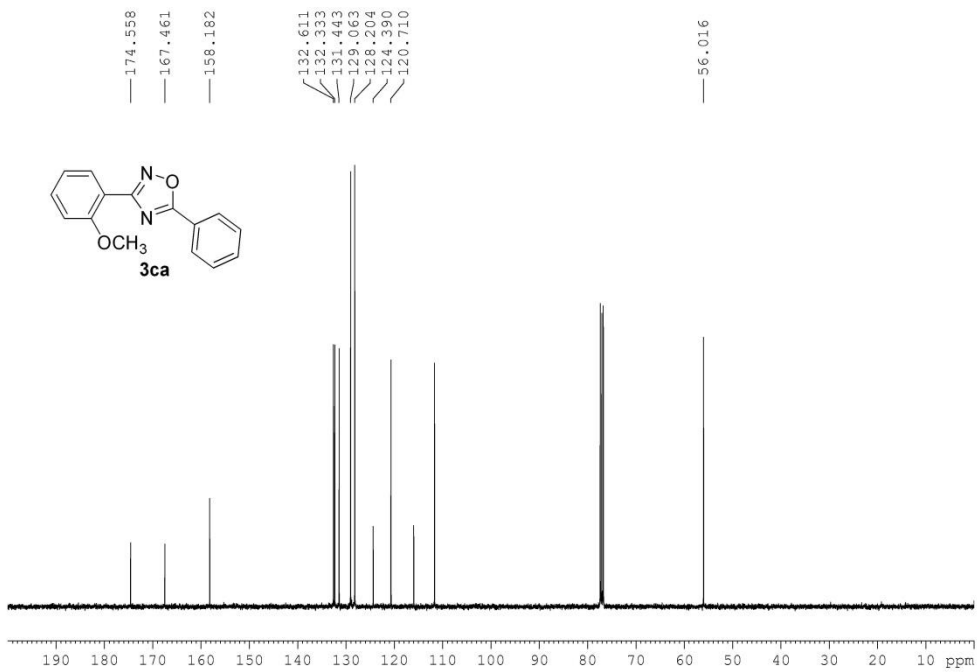

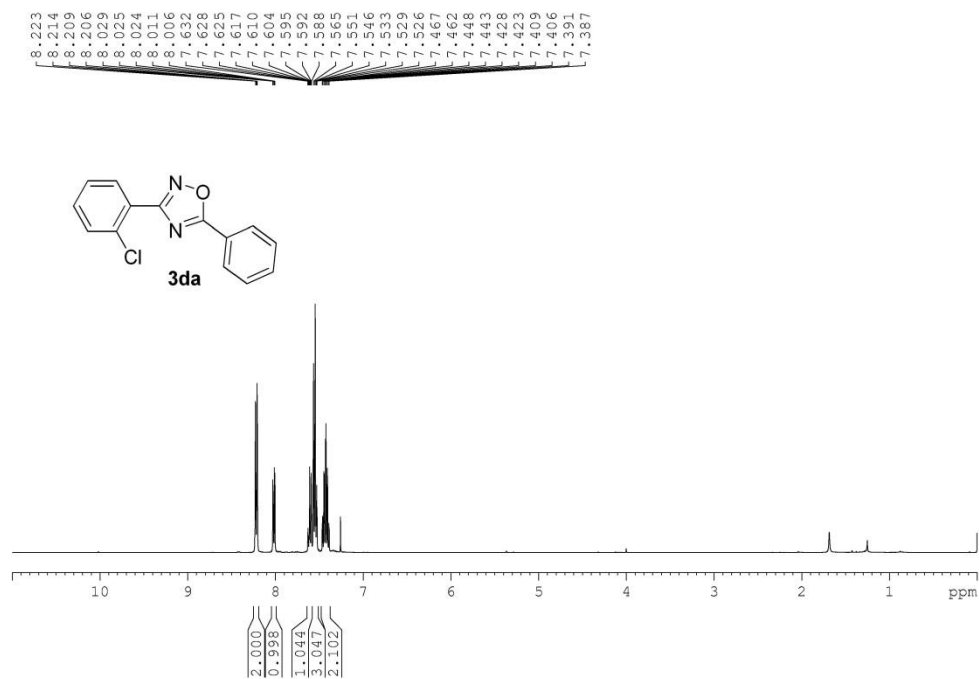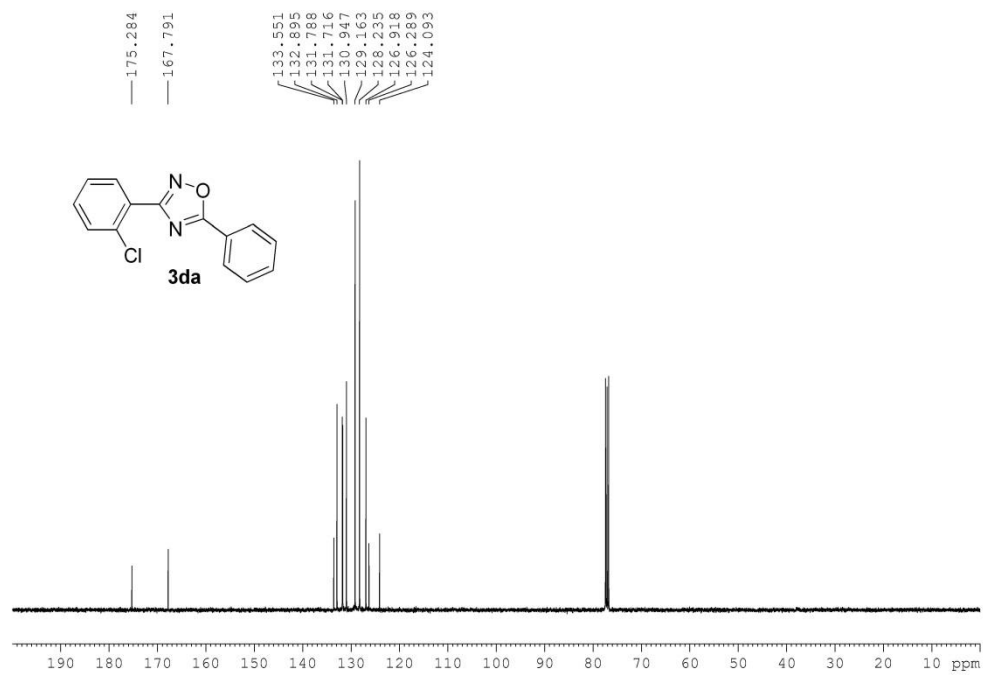



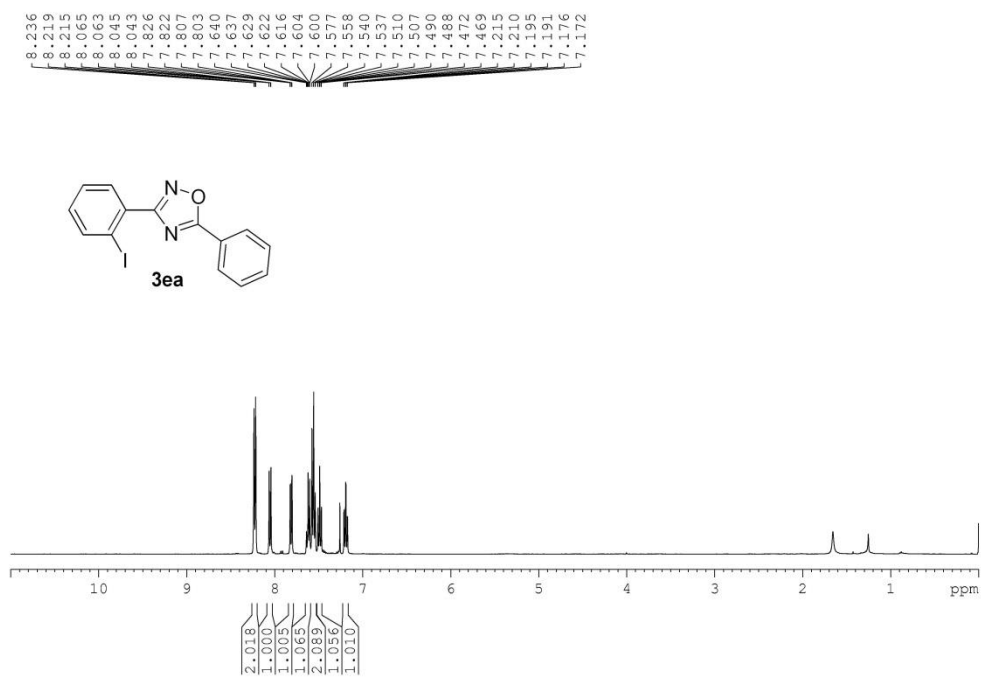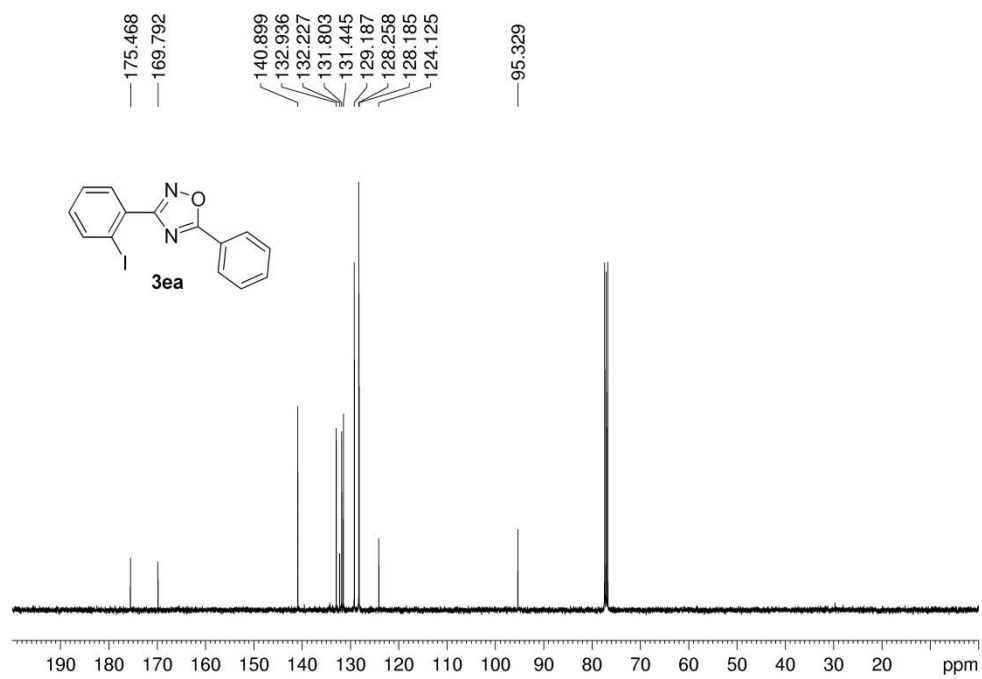

T: FTMS + p ESI Full lock ms [80.0000-1200.0000]

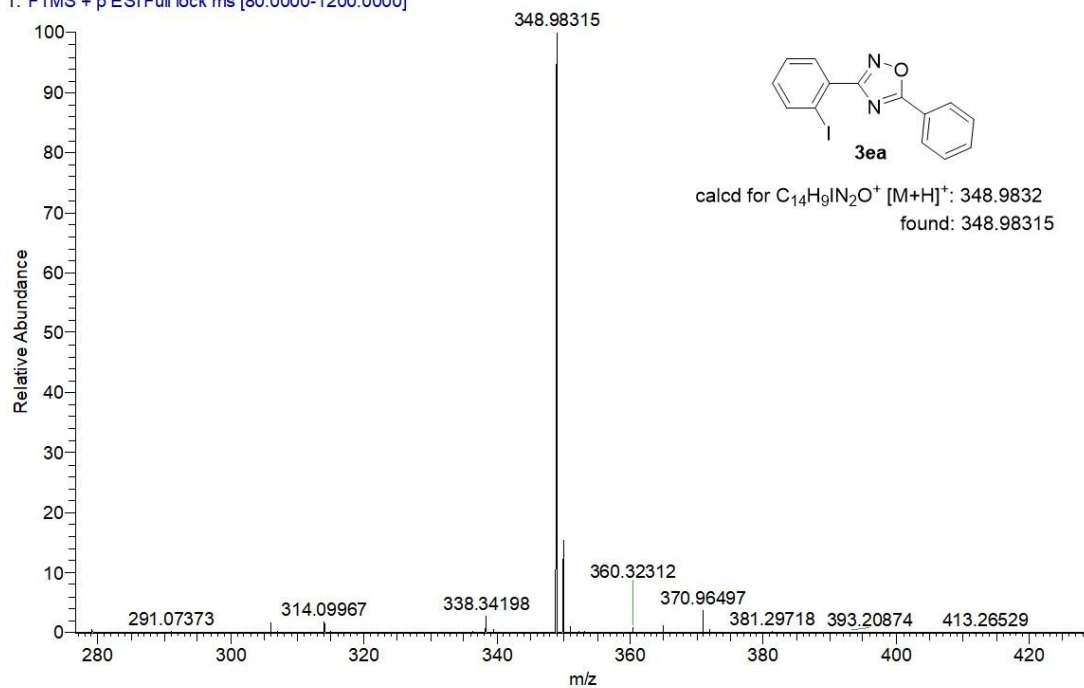

8.223  
8.205  
8.201  
7.883  
7.871  
7.867  
7.858  
7.854  
7.710  
7.694  
7.691  
7.676  
7.672  
7.655  
7.637  
7.634  
7.625  
7.618  
7.613  
7.603  
7.600  
7.597  
7.571  
7.555  
7.552  
7.534  
7.531

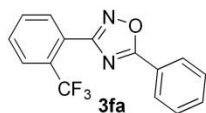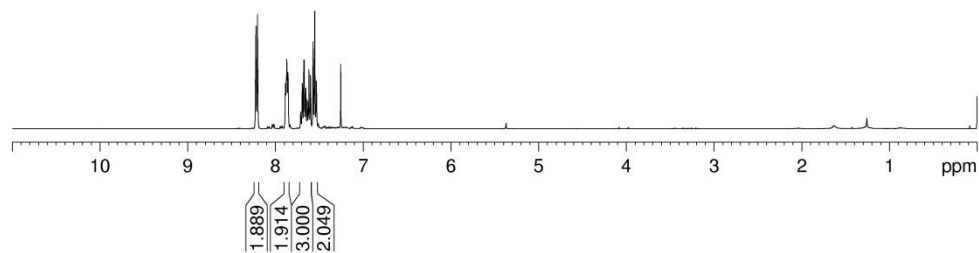

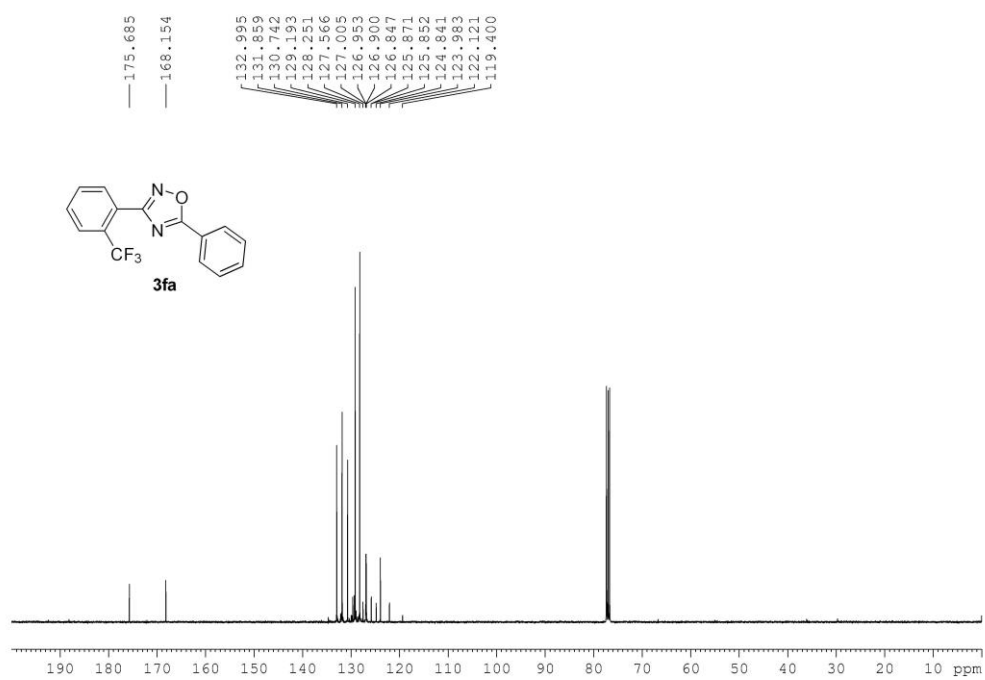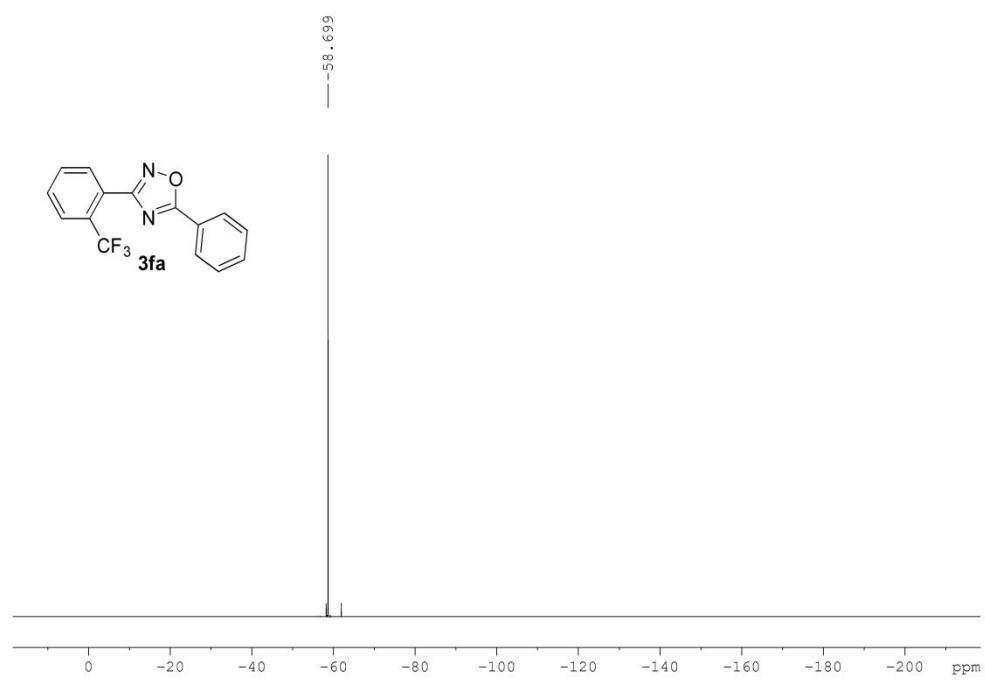

T: FTMS + p ESI Full lock ms [80.0000-1200.0000]

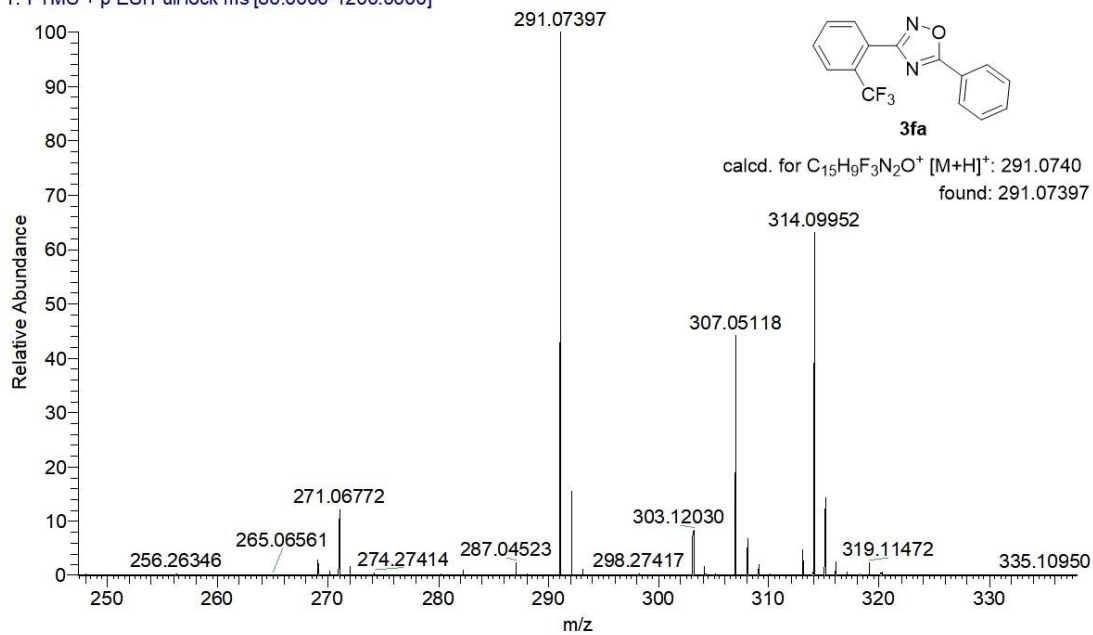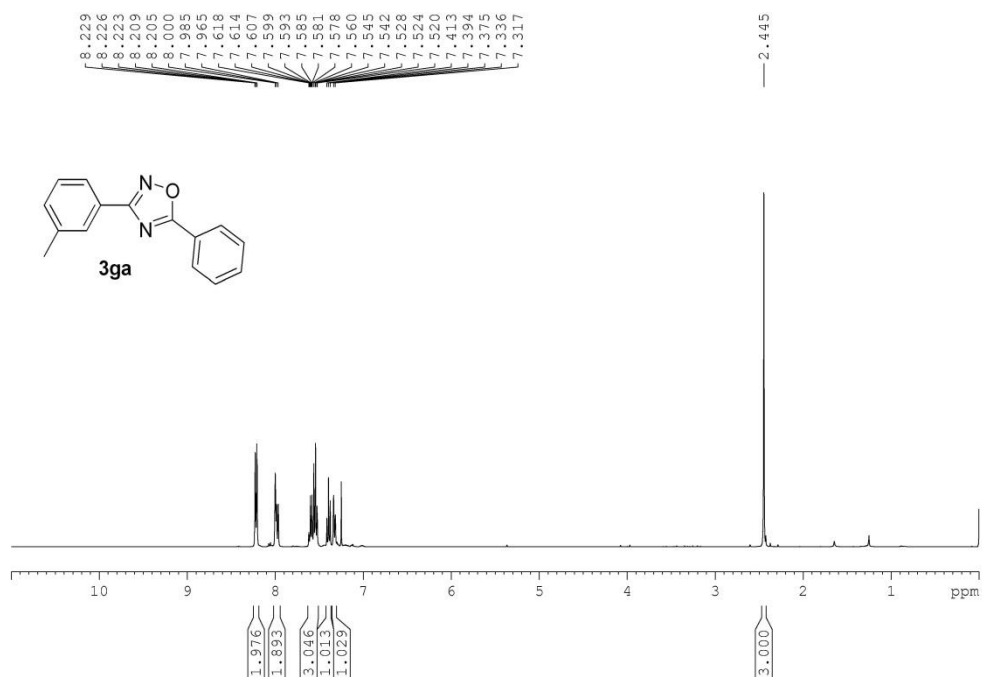

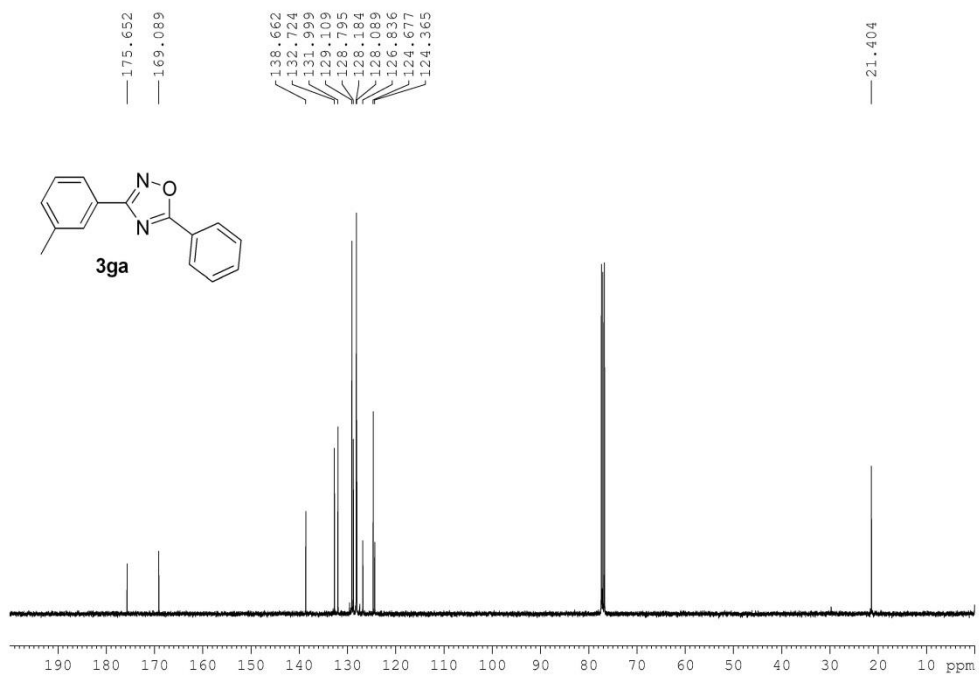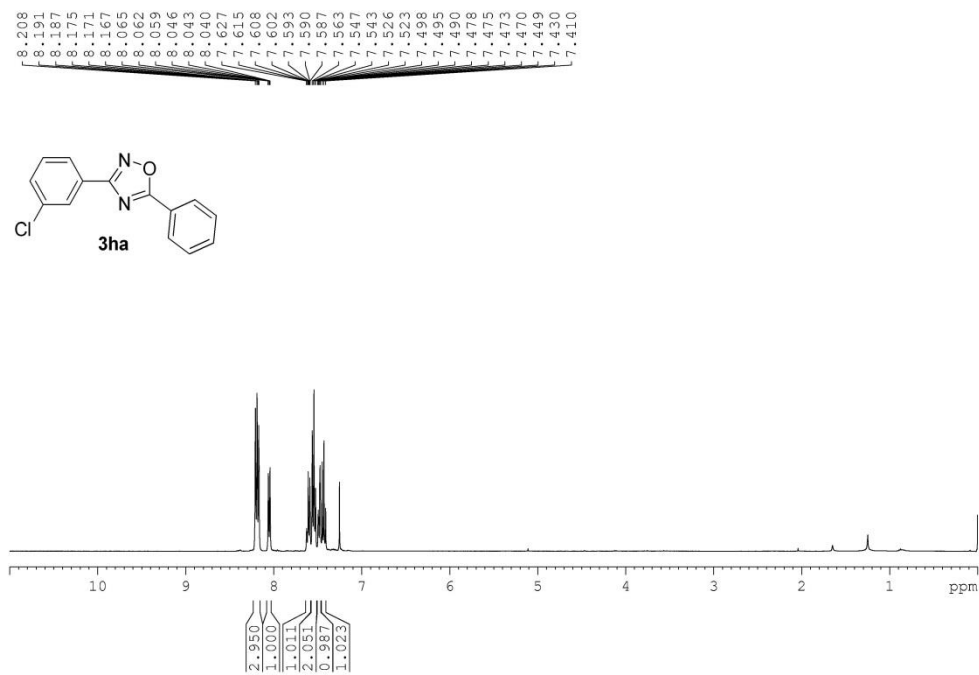

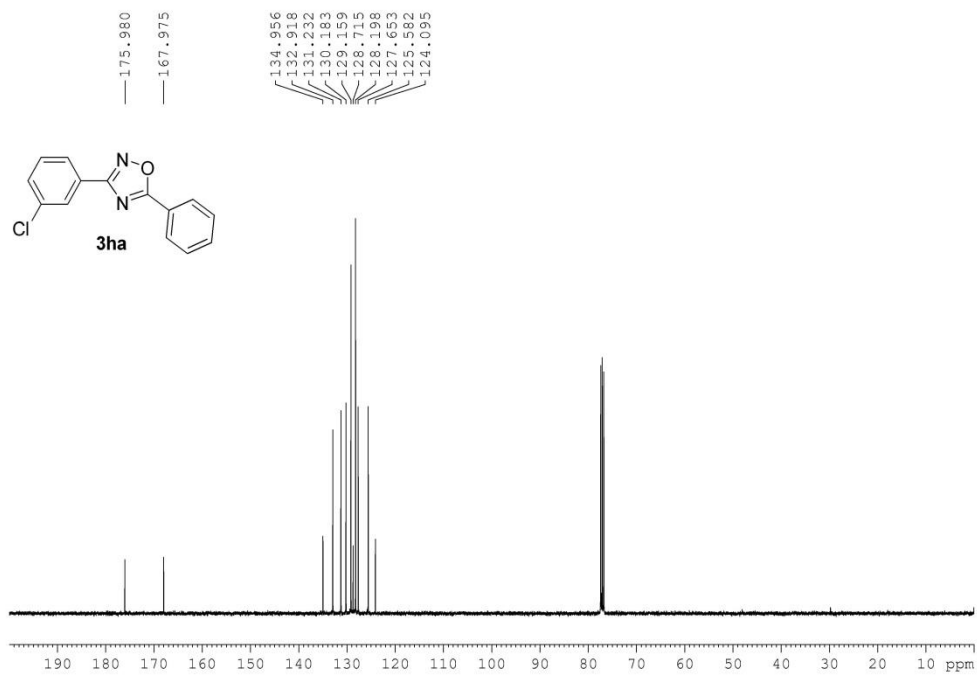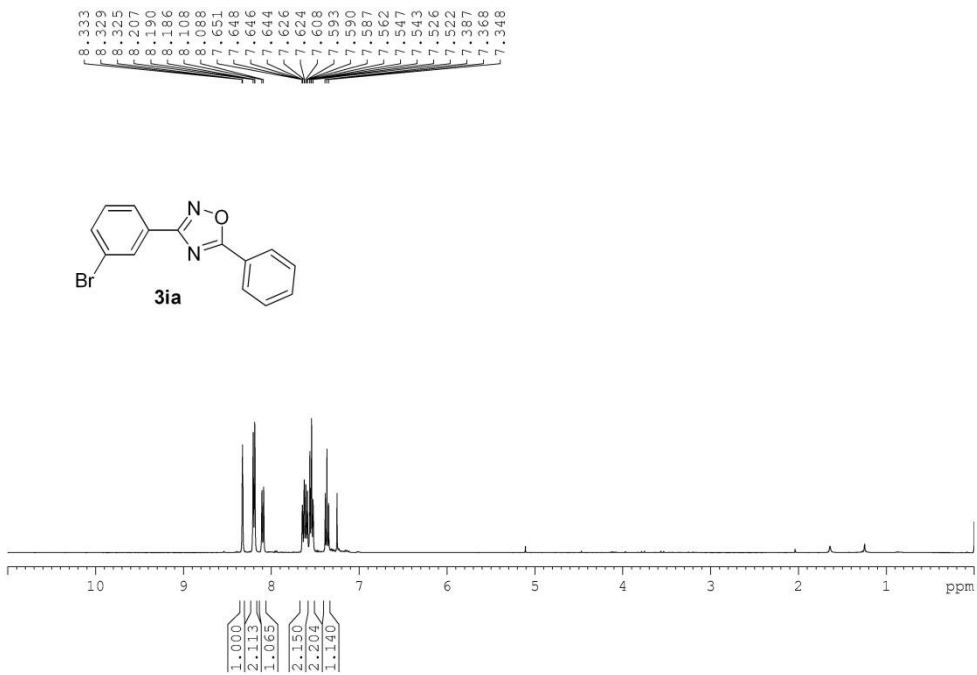

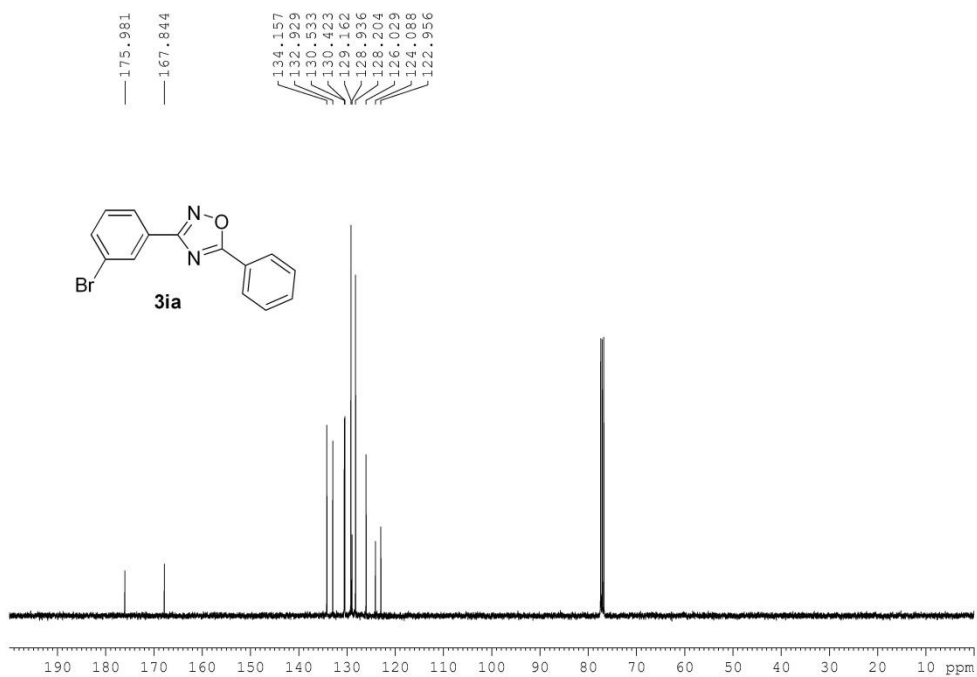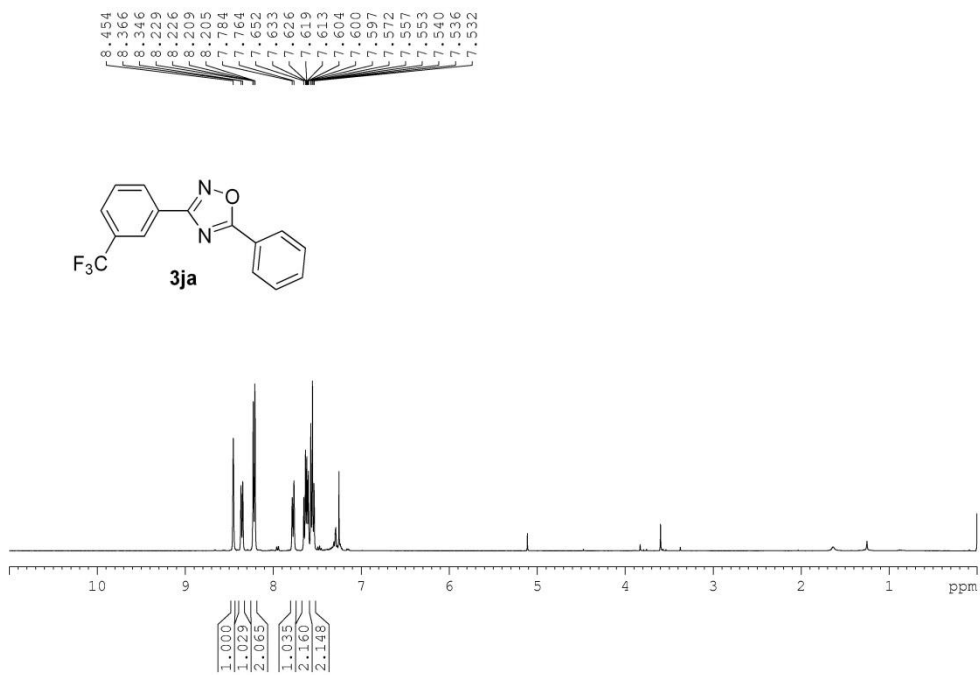

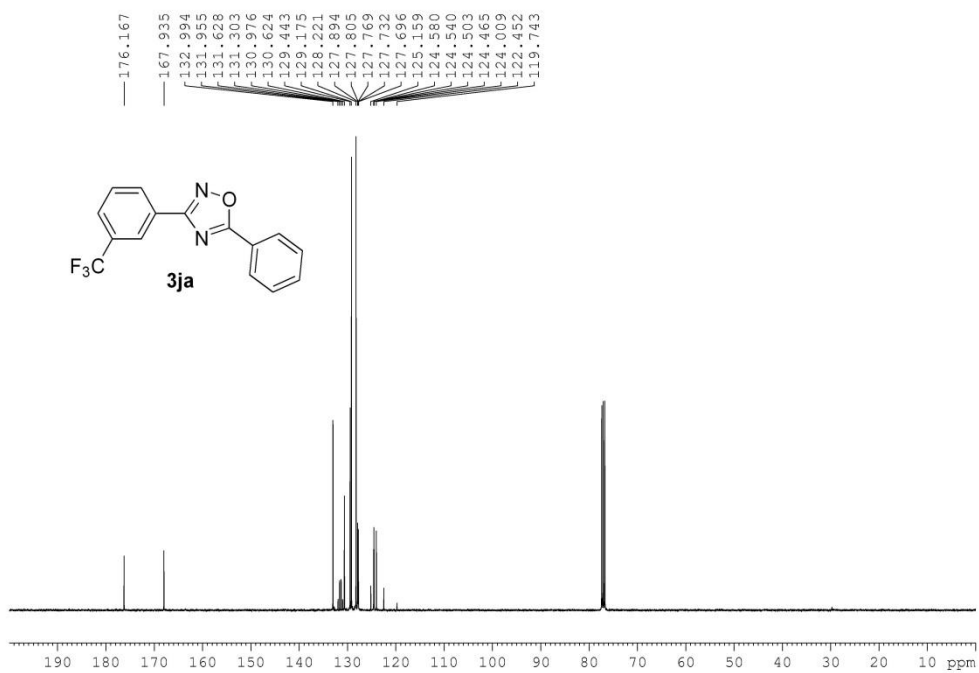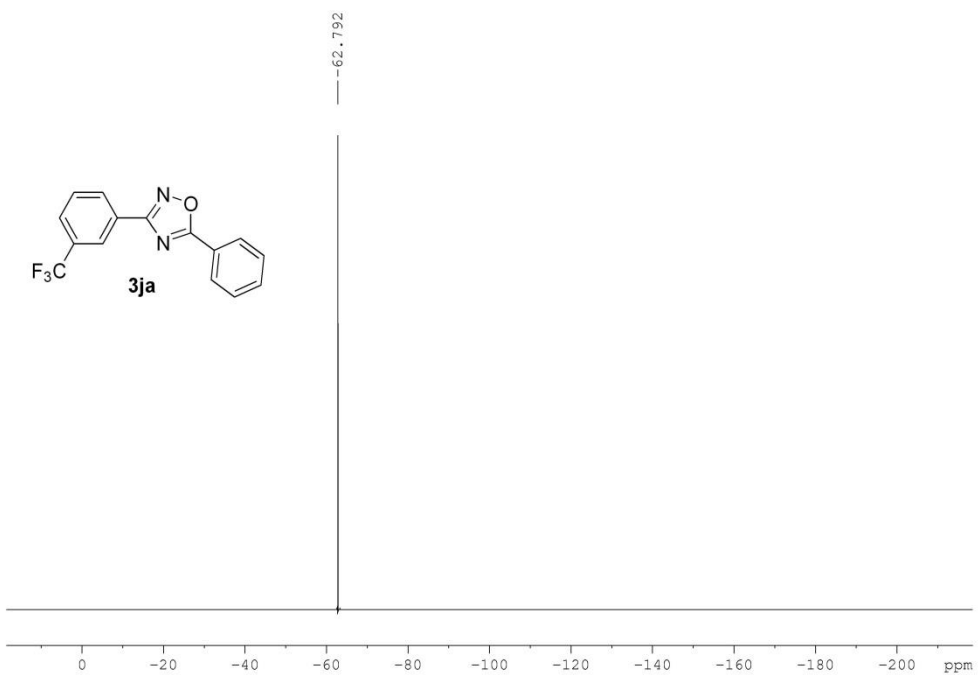



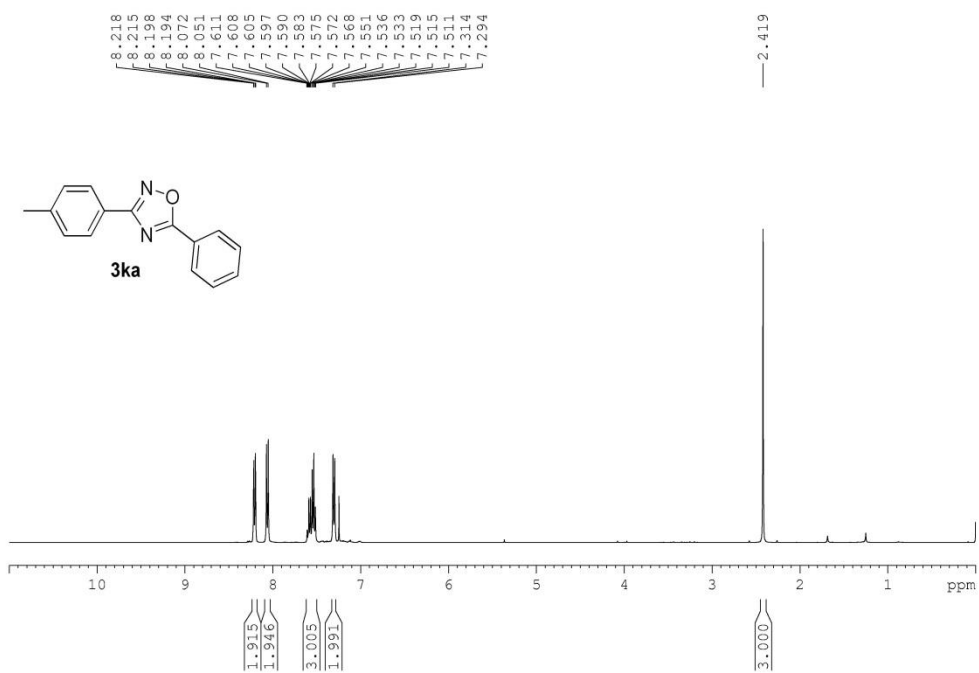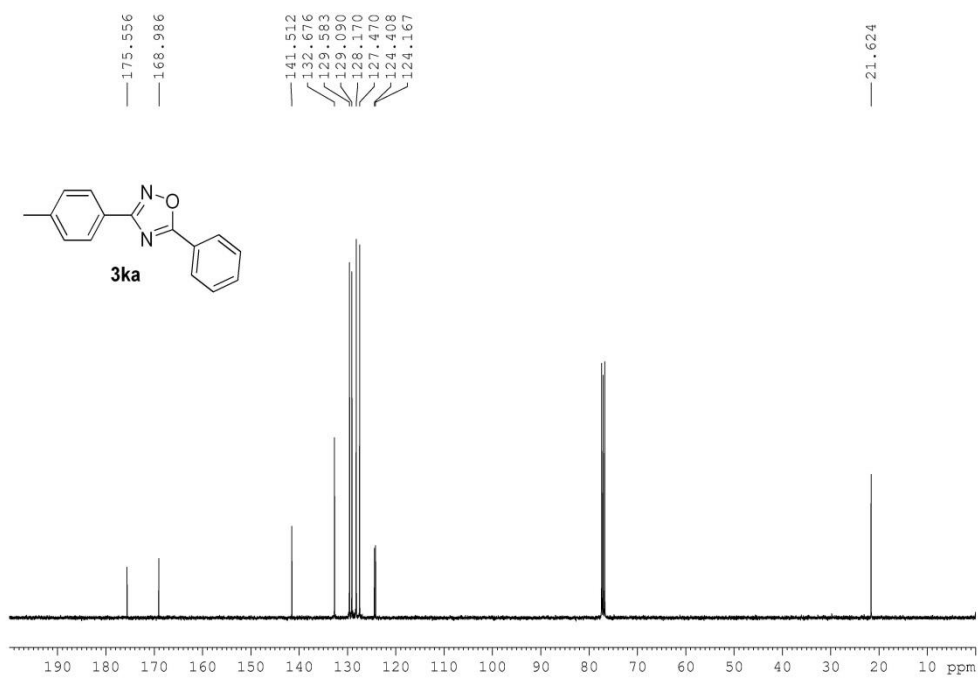

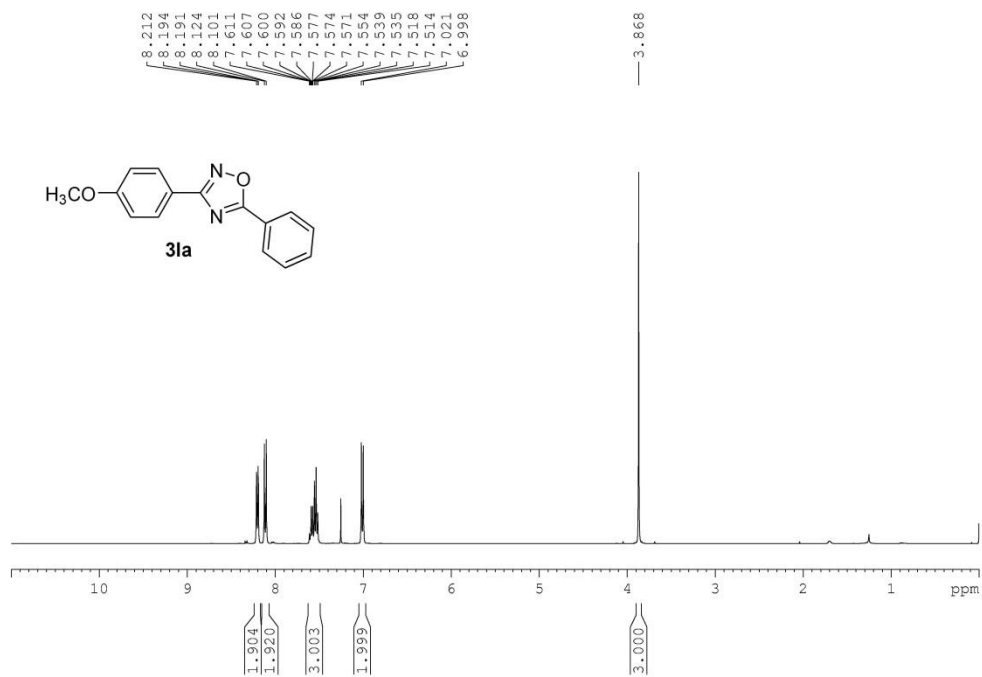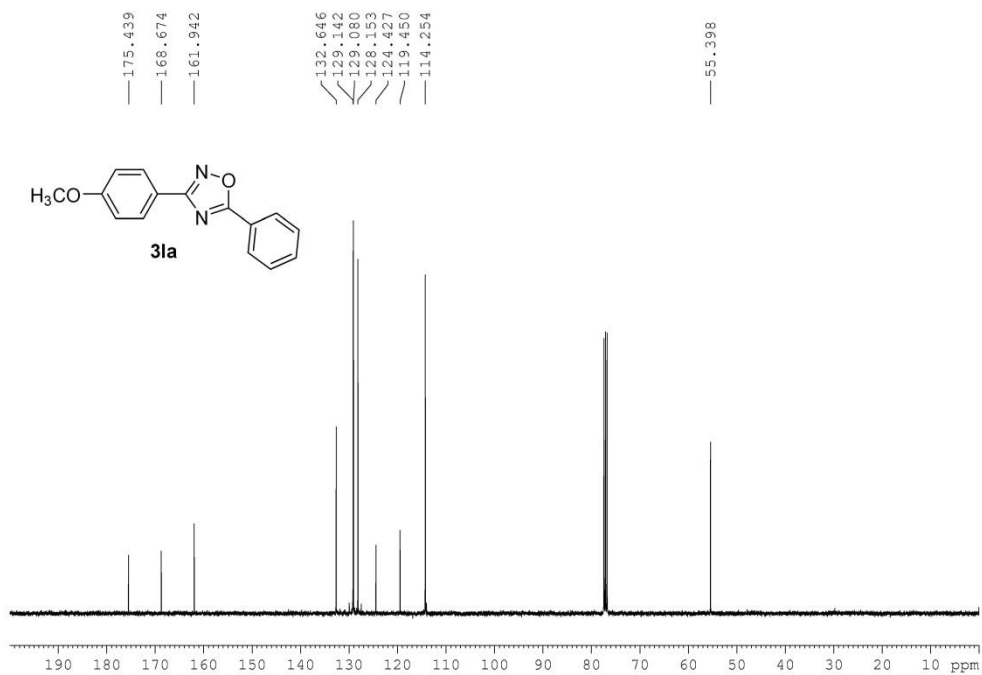

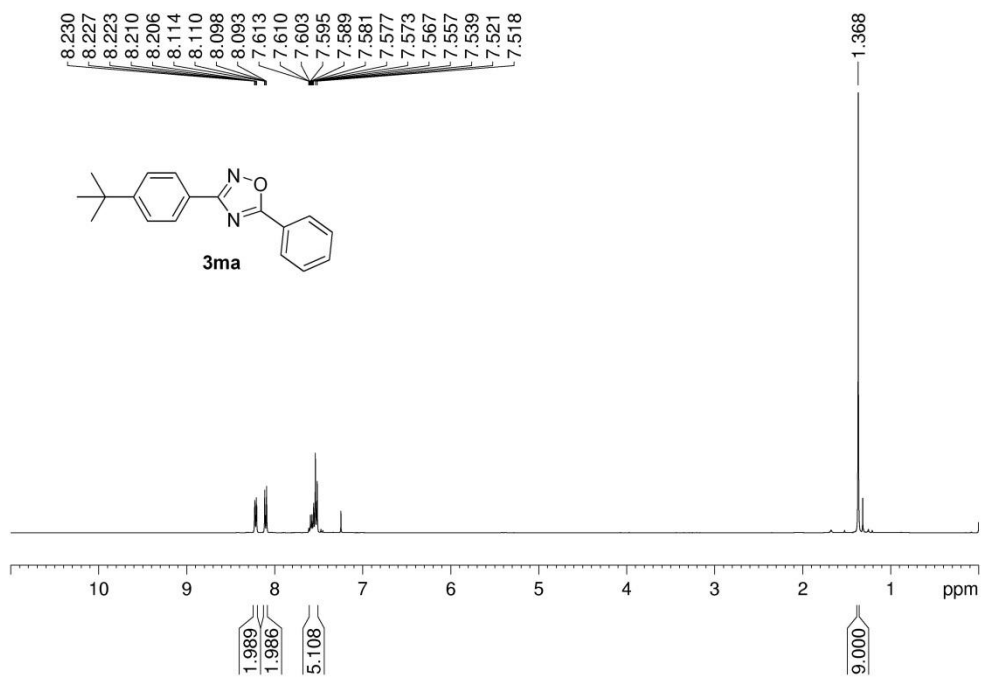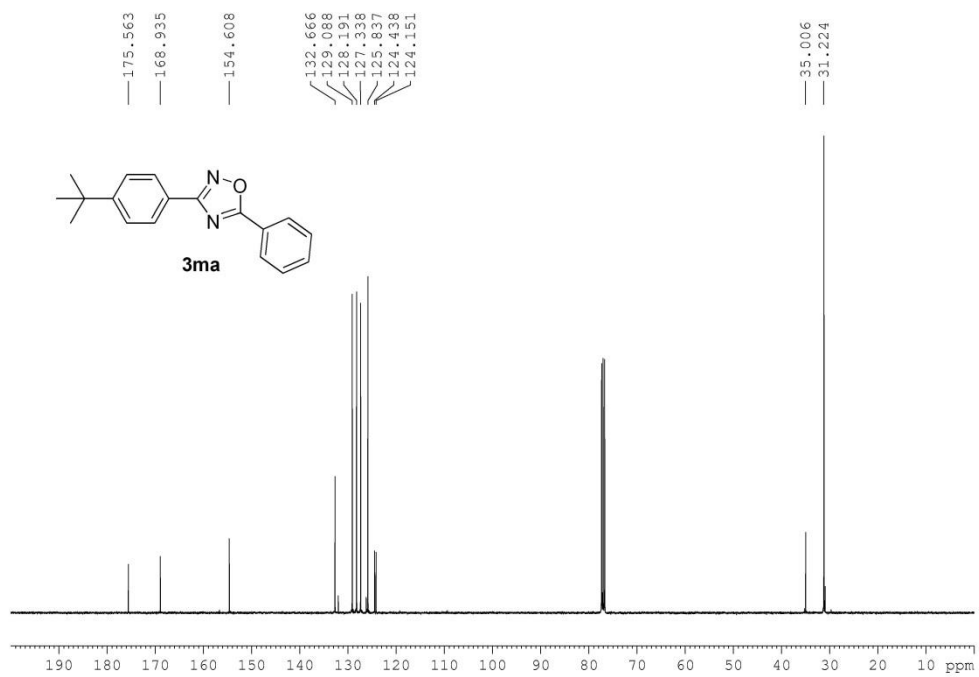

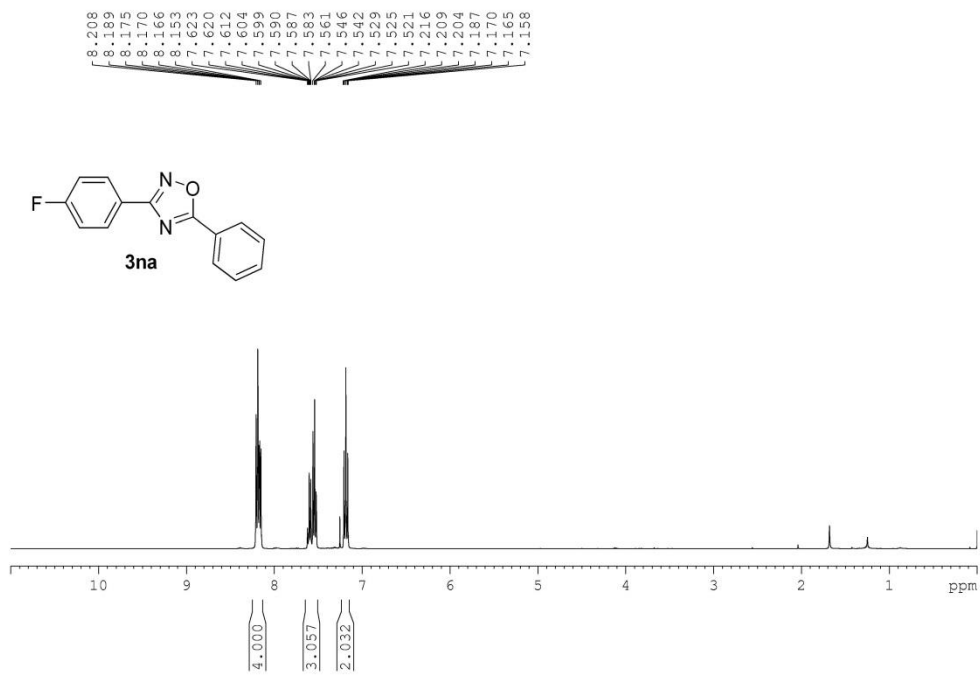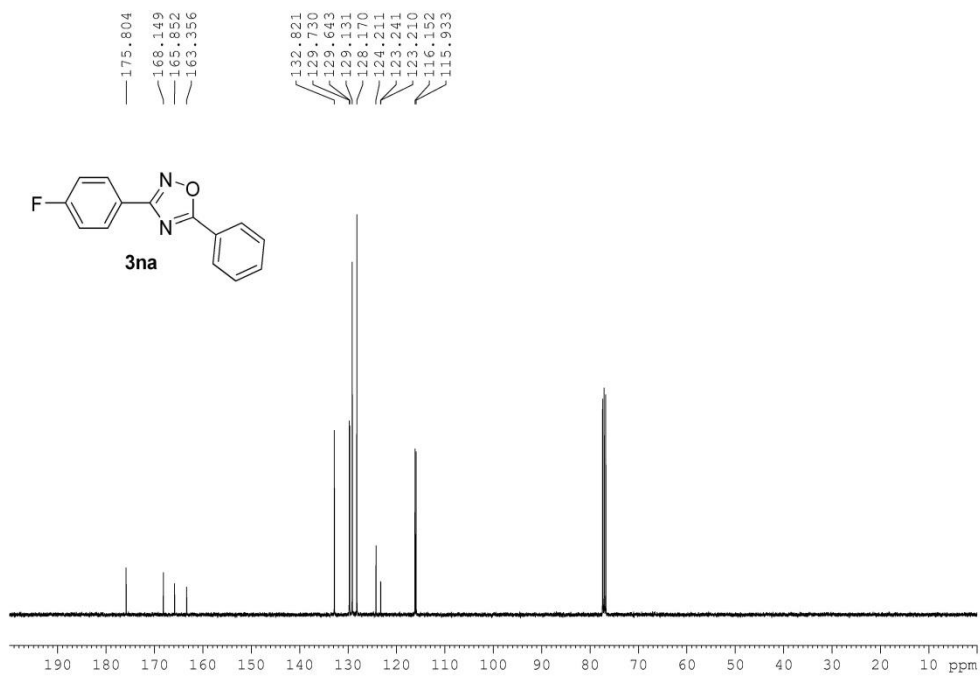

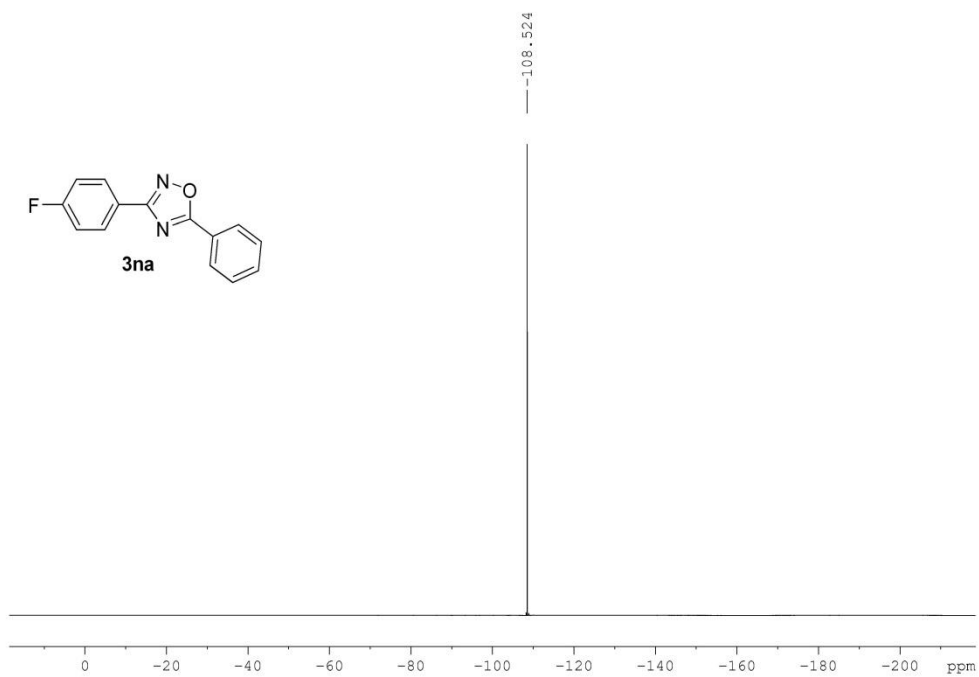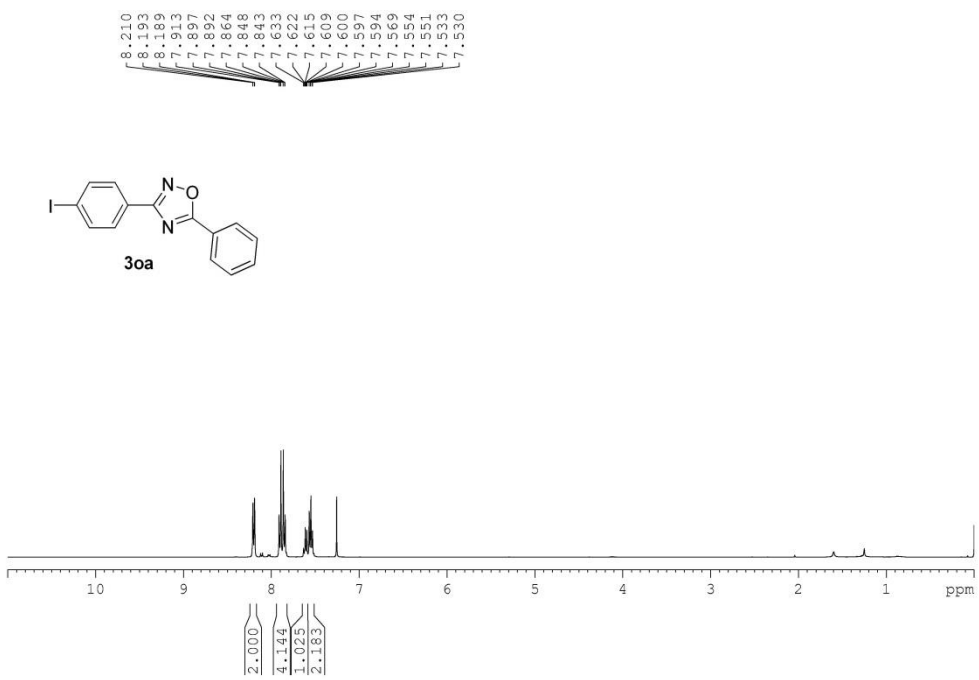

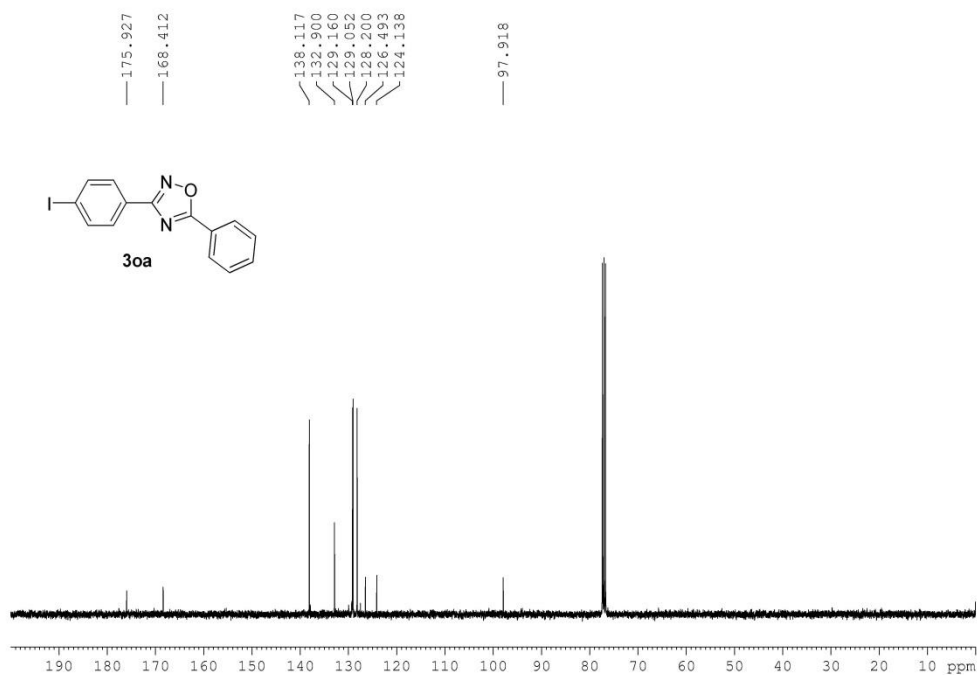

T: FTMS + p ESI Full lock ms [80.0000-1200.0000]

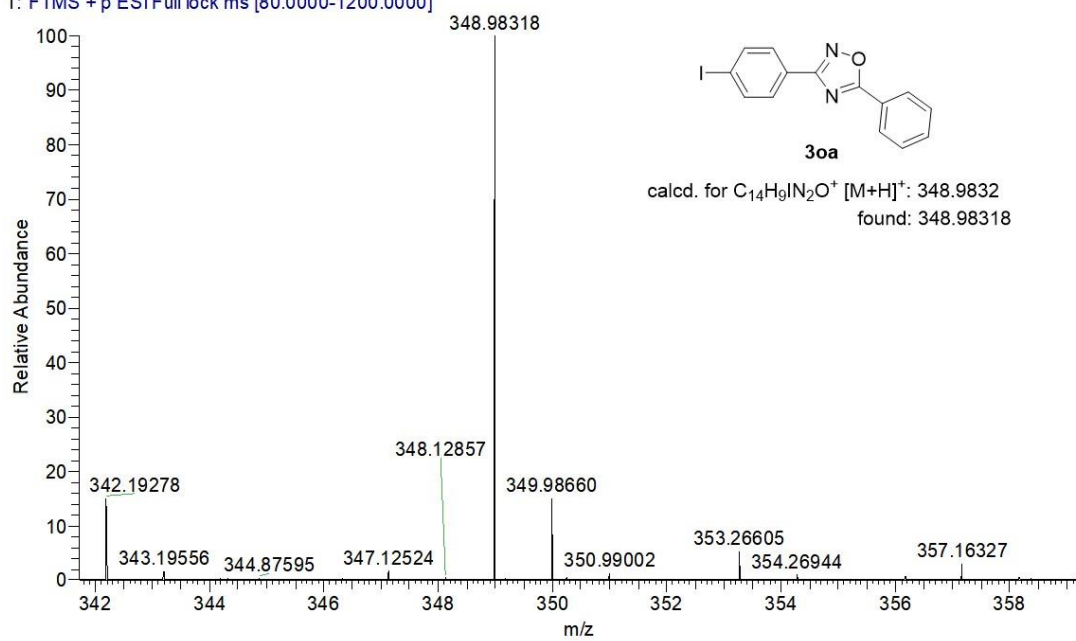

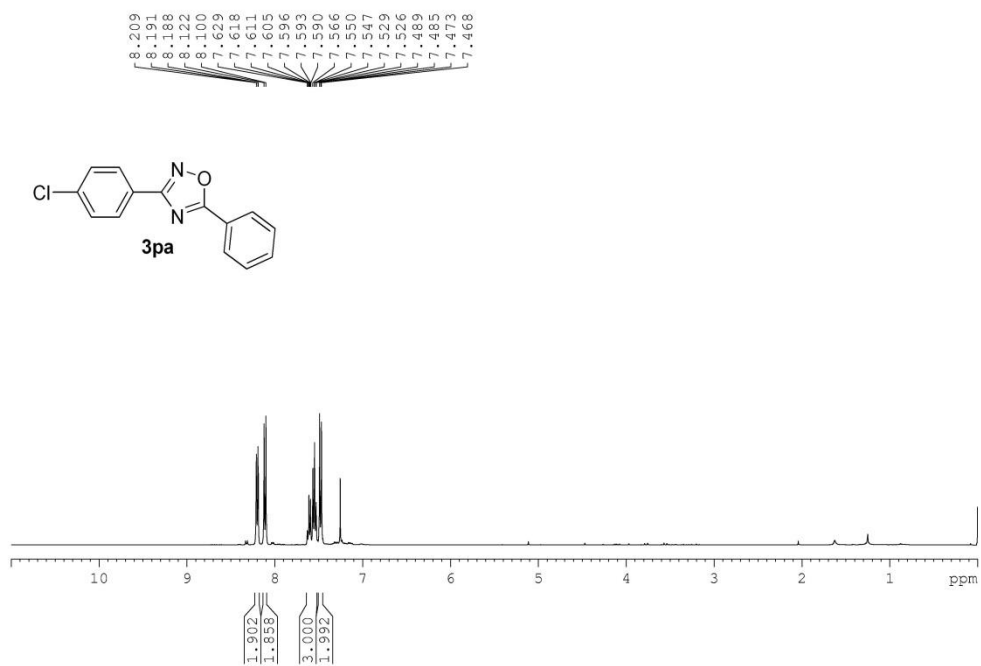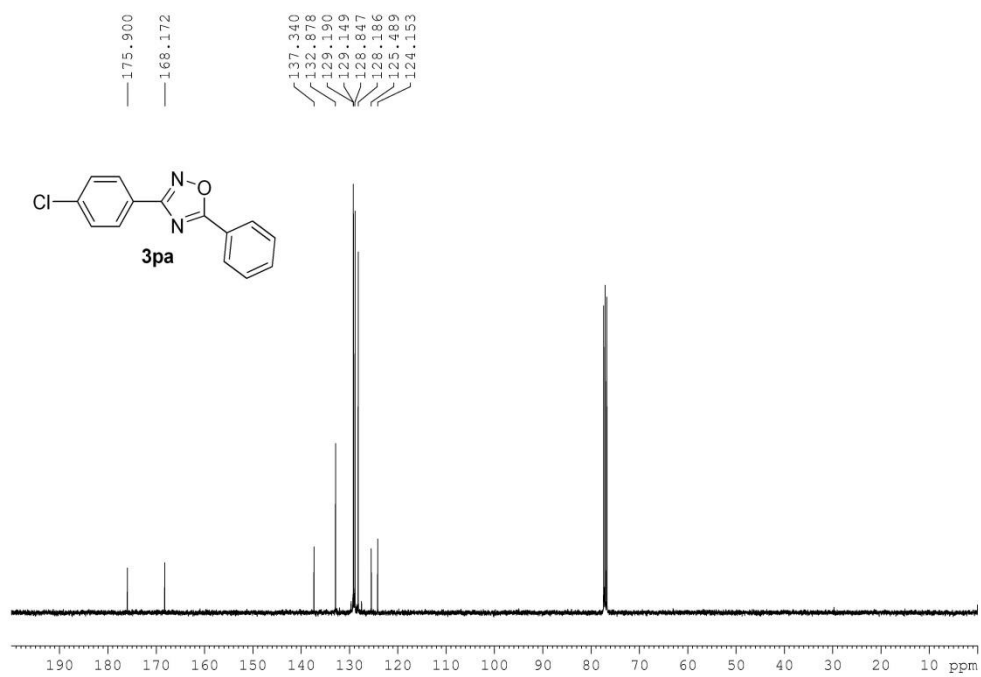

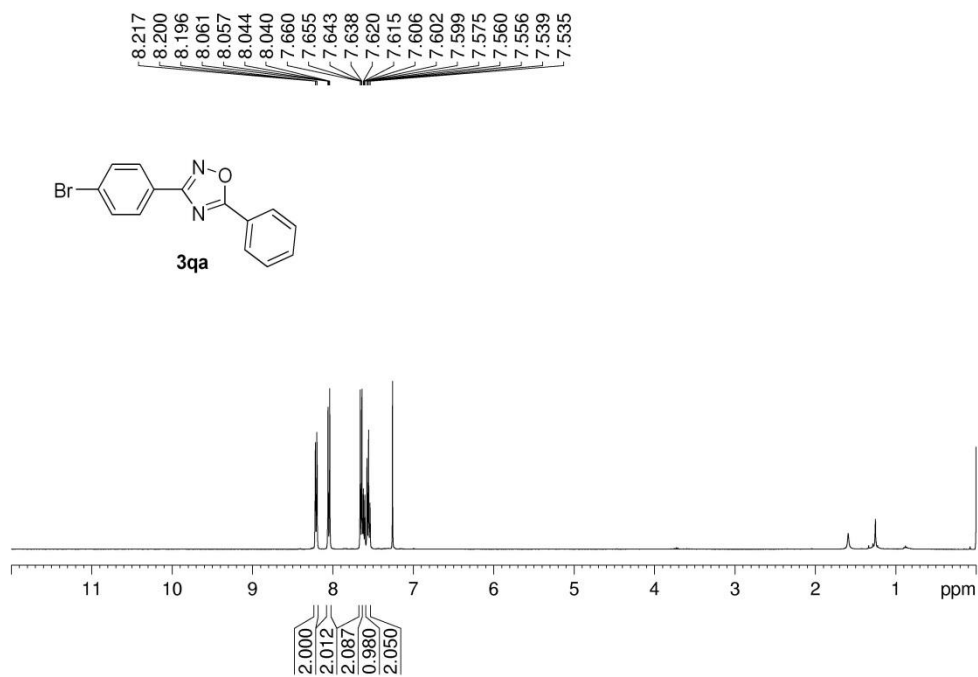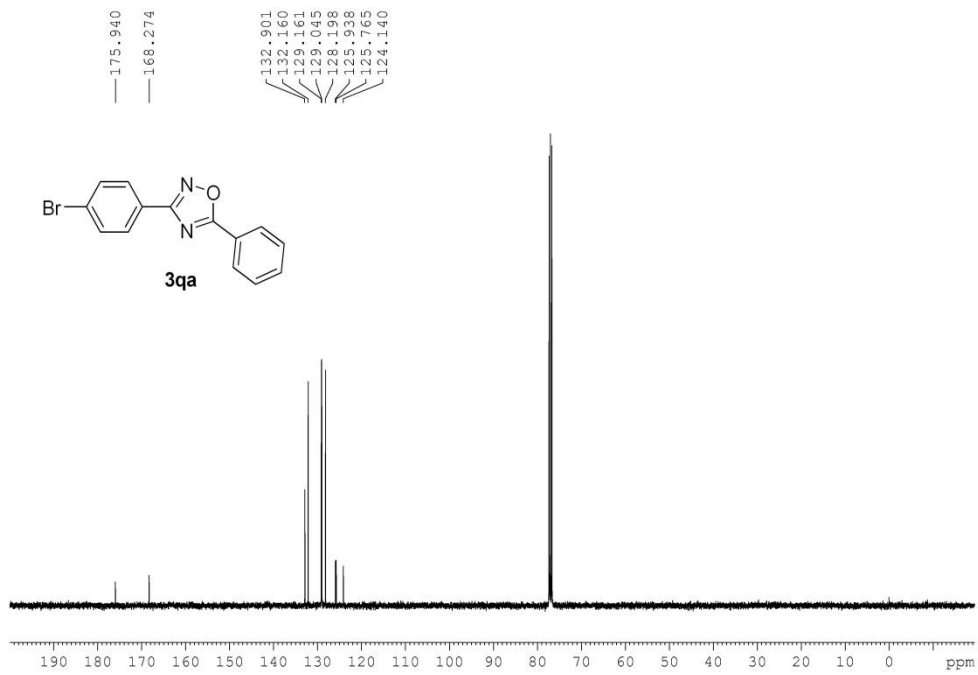



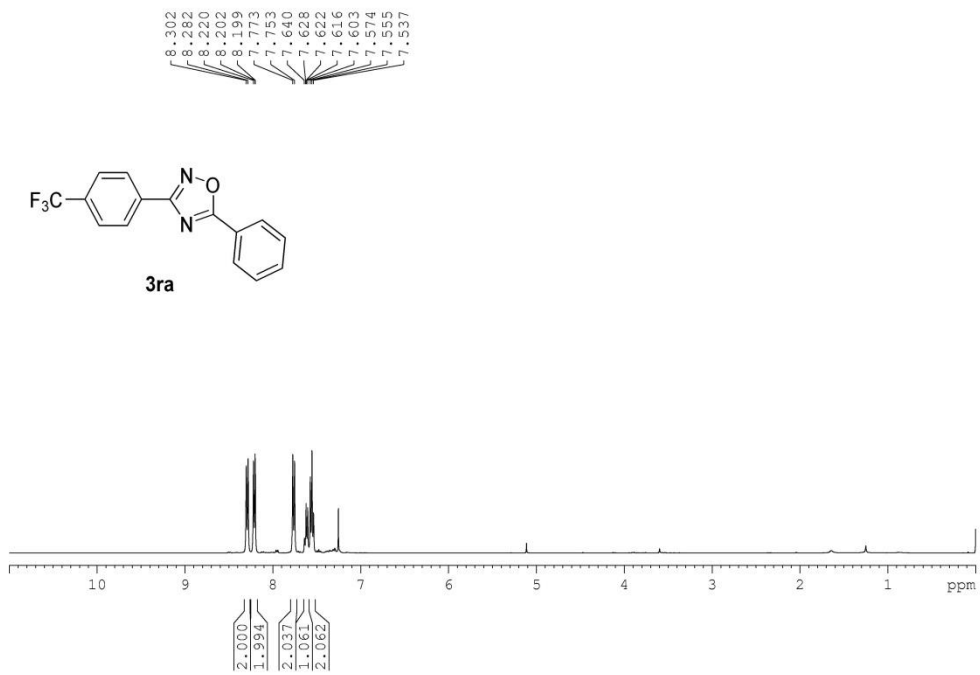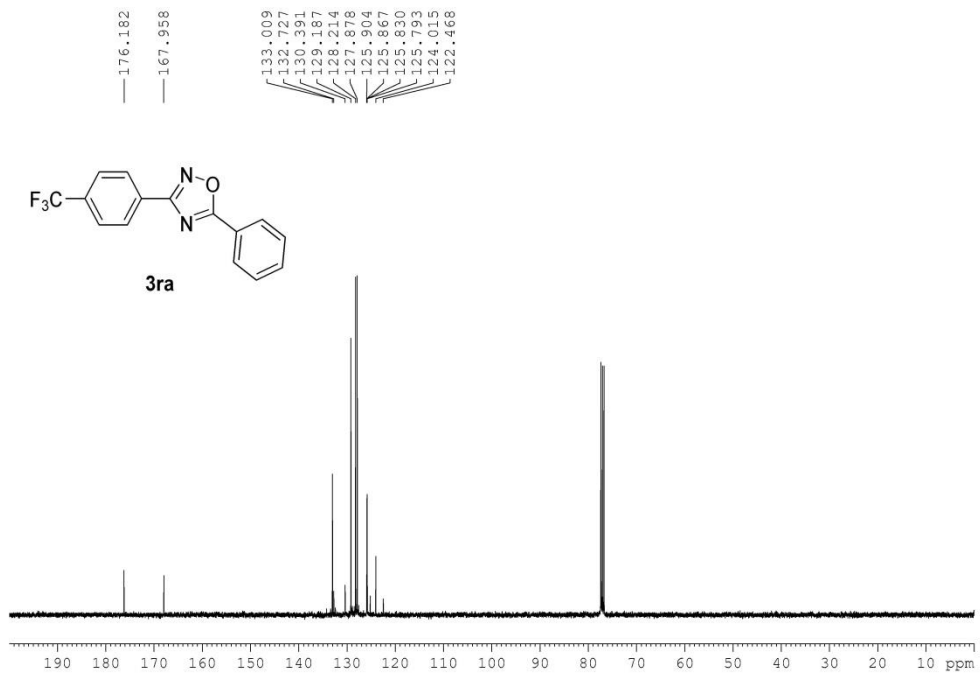

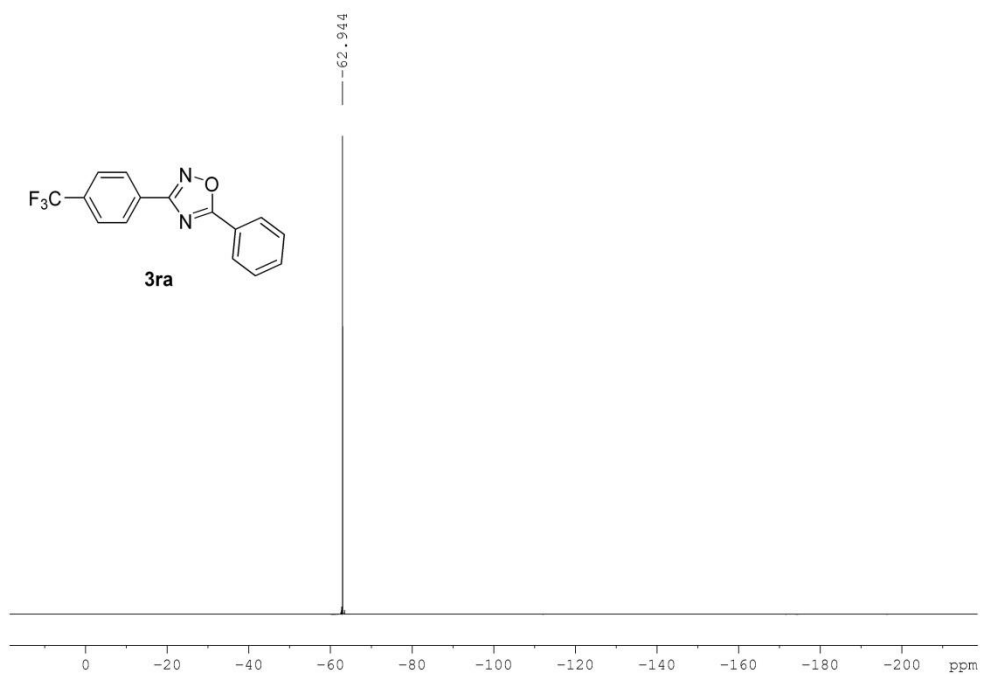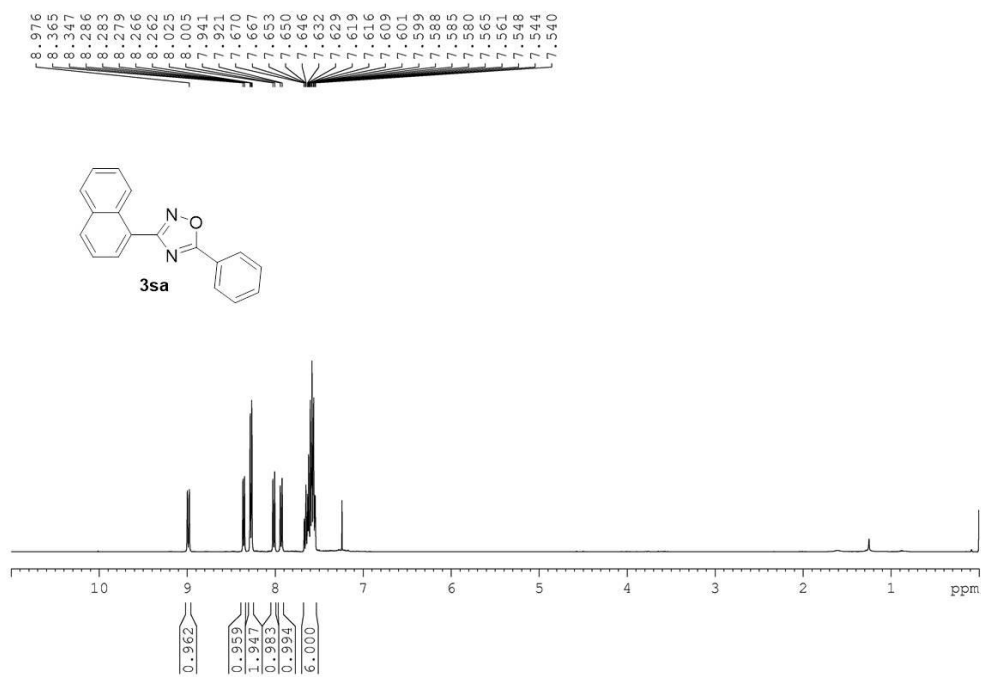

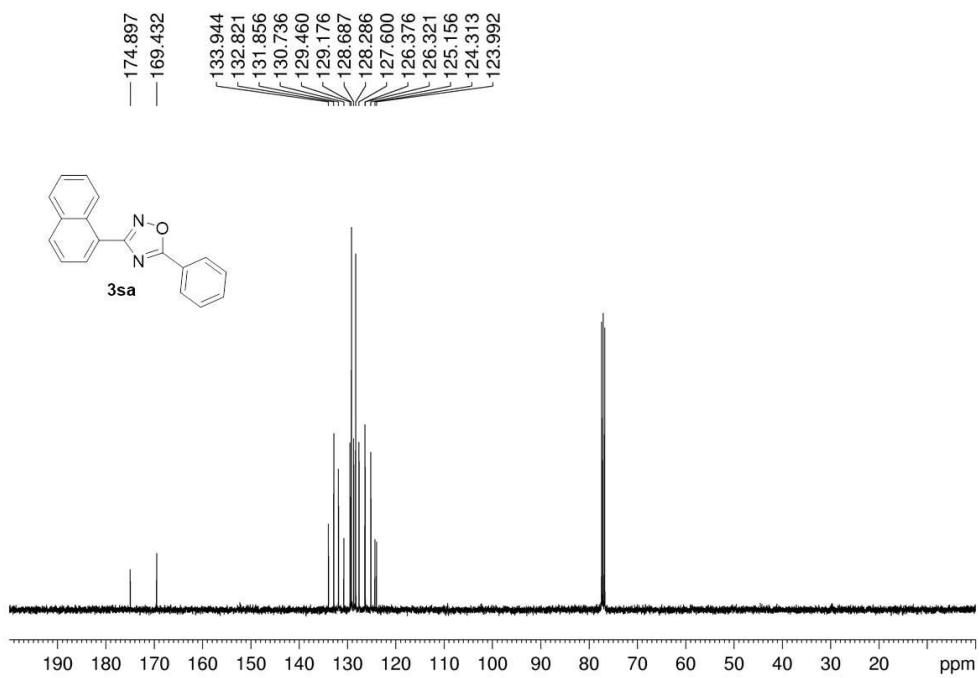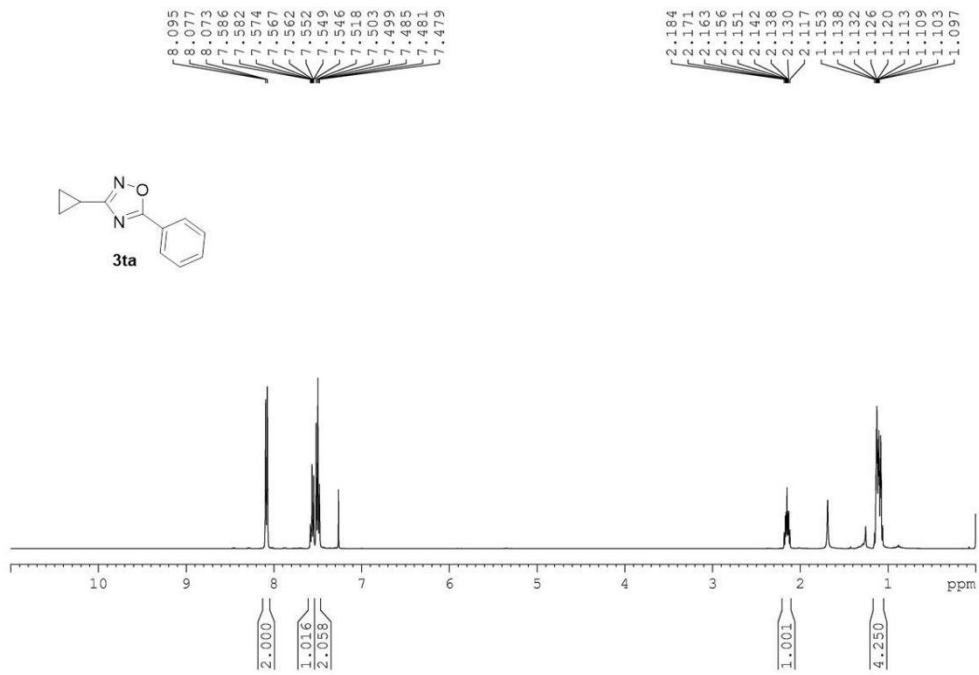

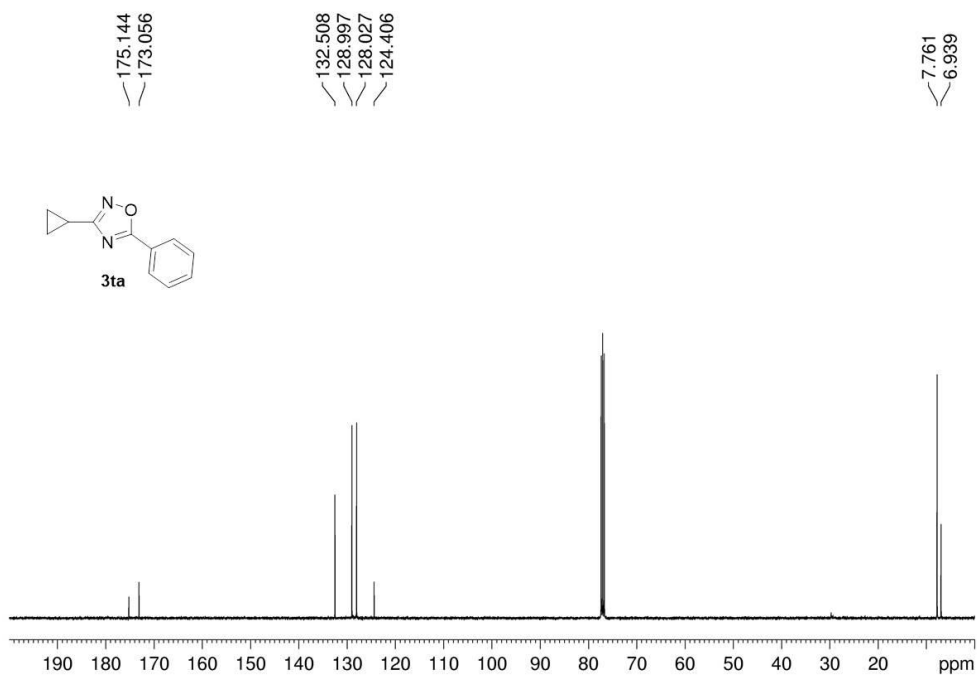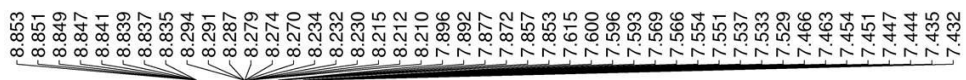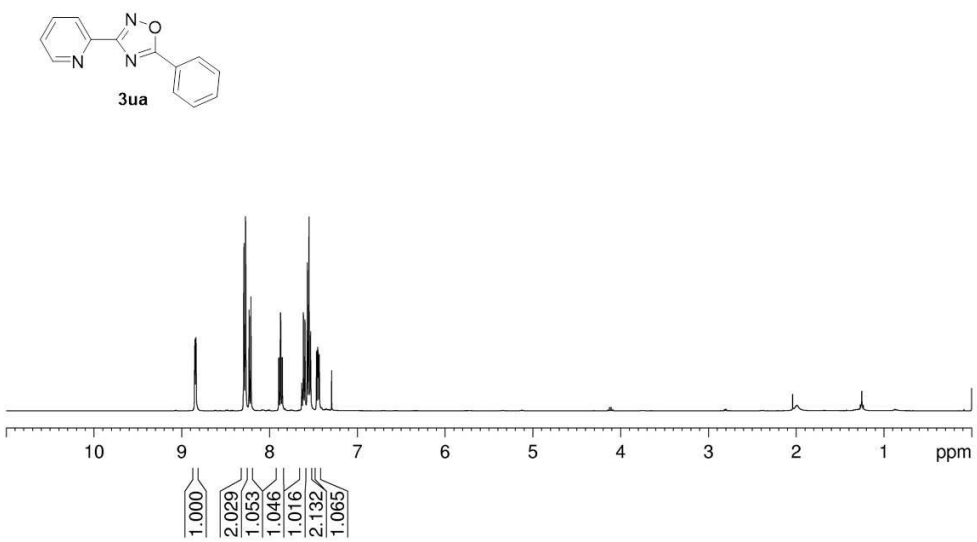

176.470  
168.780  
150.438  
146.463  
137.058  
132.952  
129.095  
128.330  
125.525  
123.995  
123.263

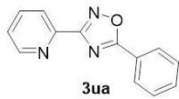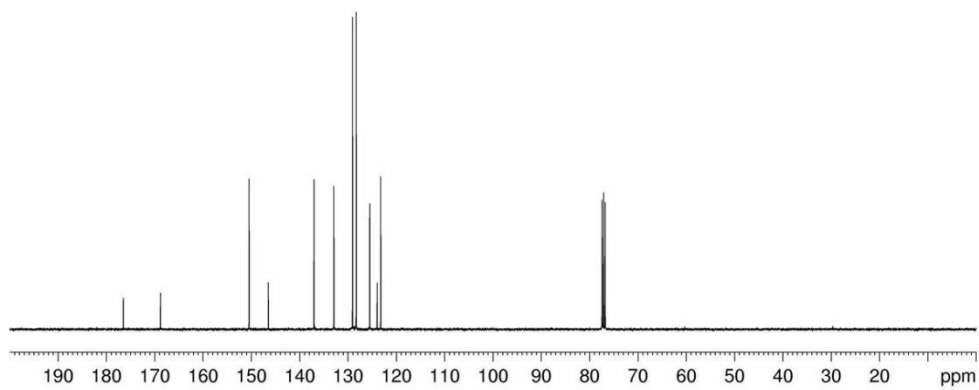

8.213  
8.195  
8.192  
7.748  
7.646  
7.628  
7.616  
7.609  
7.604  
7.591  
7.560  
7.541  
7.523  
7.221  
7.213  
6.599  
6.595  
6.591  
6.587

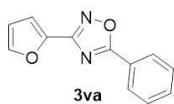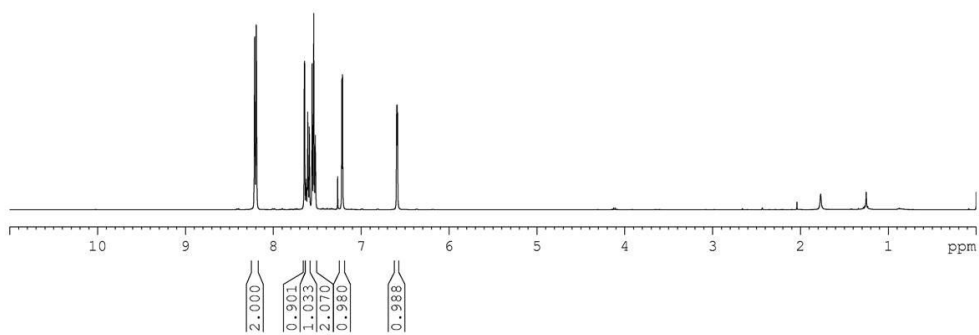

— 175.739  
 — 161.899  
 \ 145.199  
 \ 142.397  
 \ 132.982  
 \ 129.132  
 \ 128.258  
 \ 123.868  
 \ 113.778  
 \ 111.874

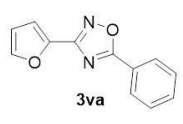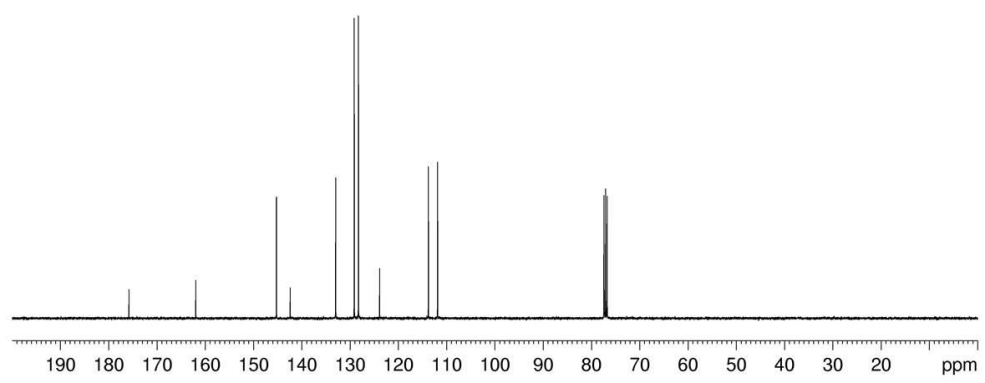

T: FTMS + p ESI Full lock ms [80.0000-1200.0000]

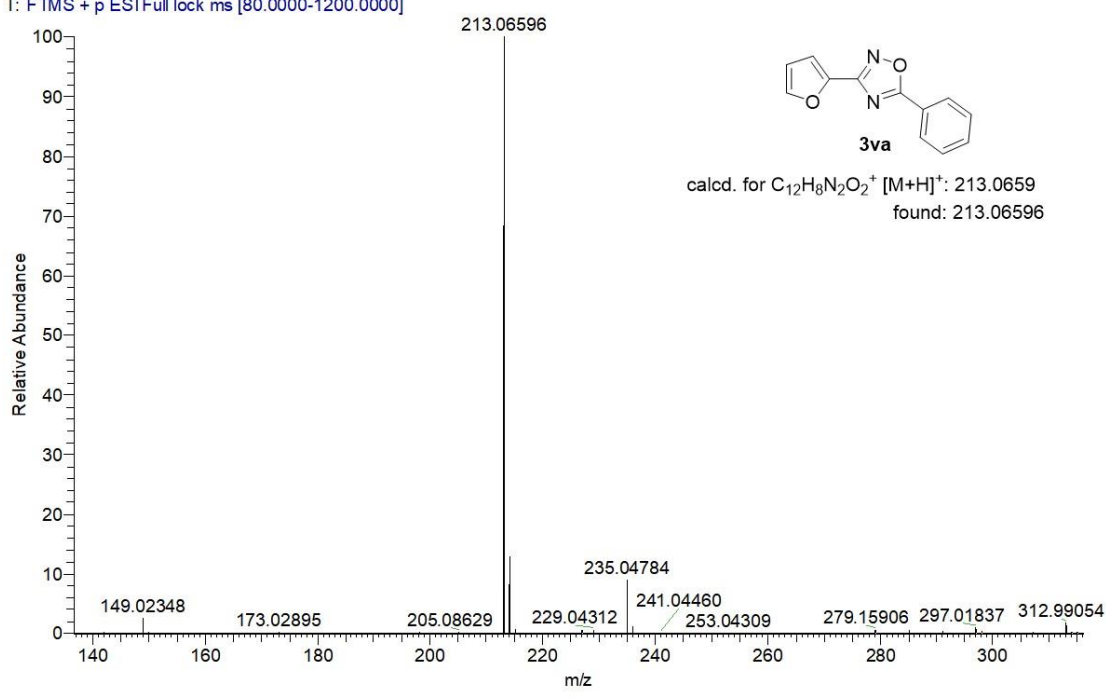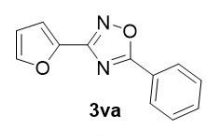

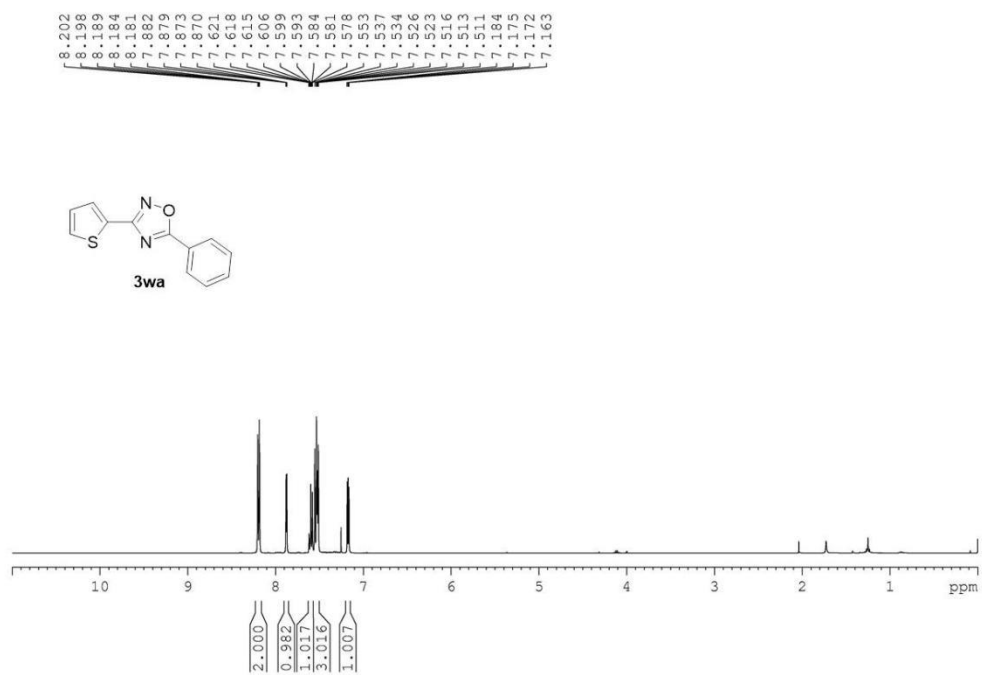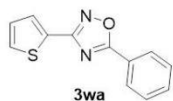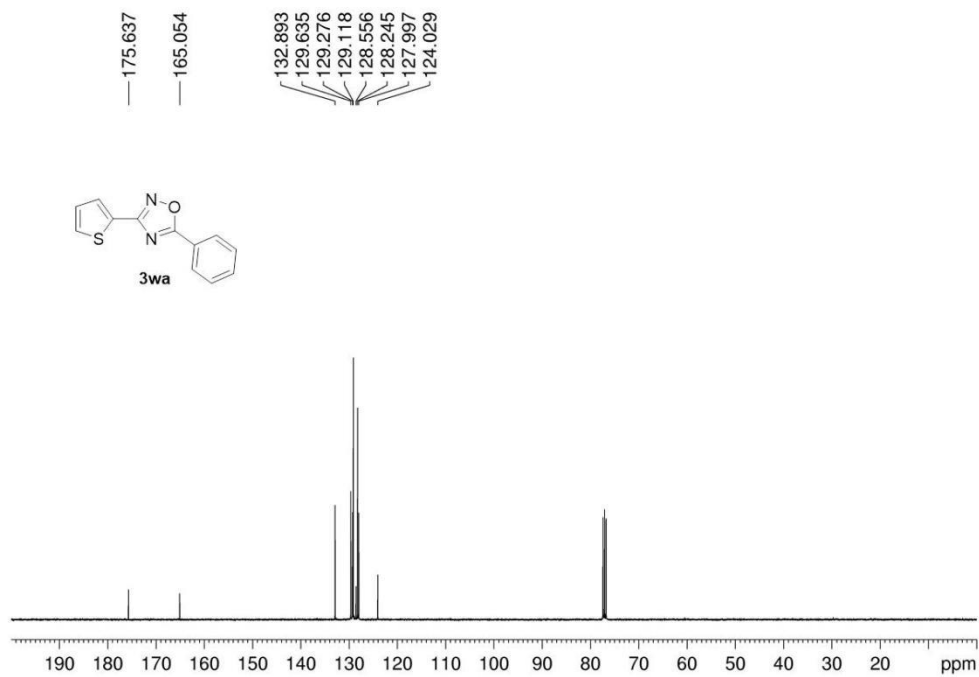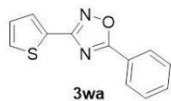

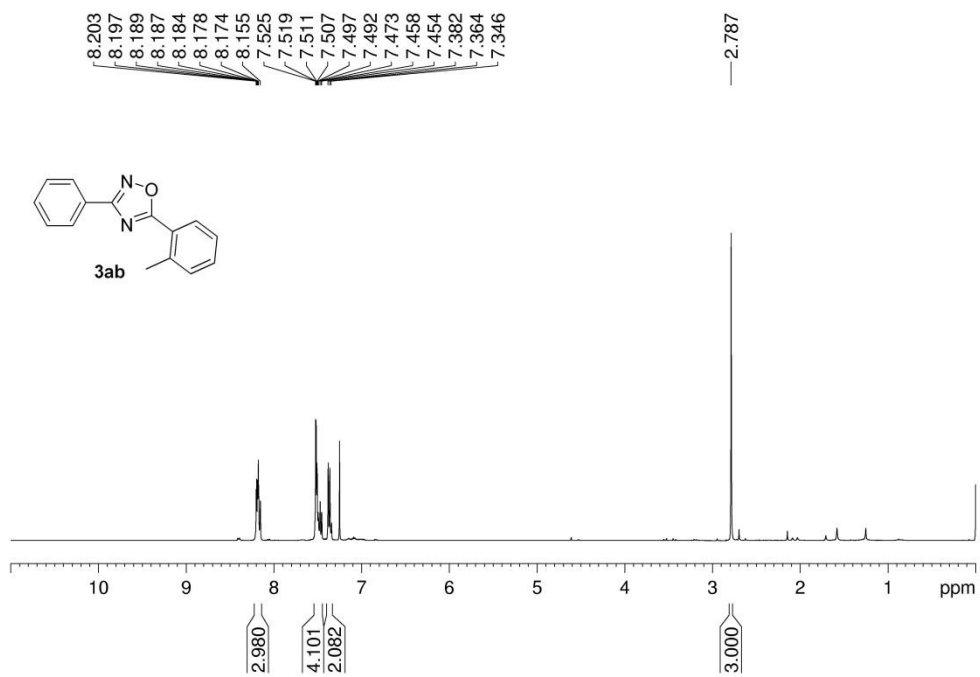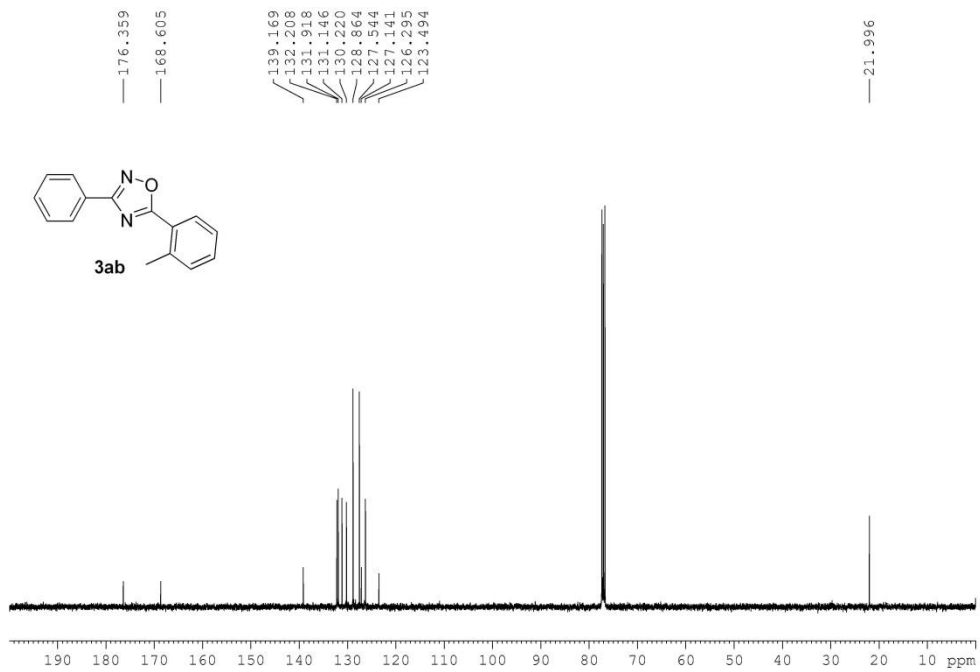



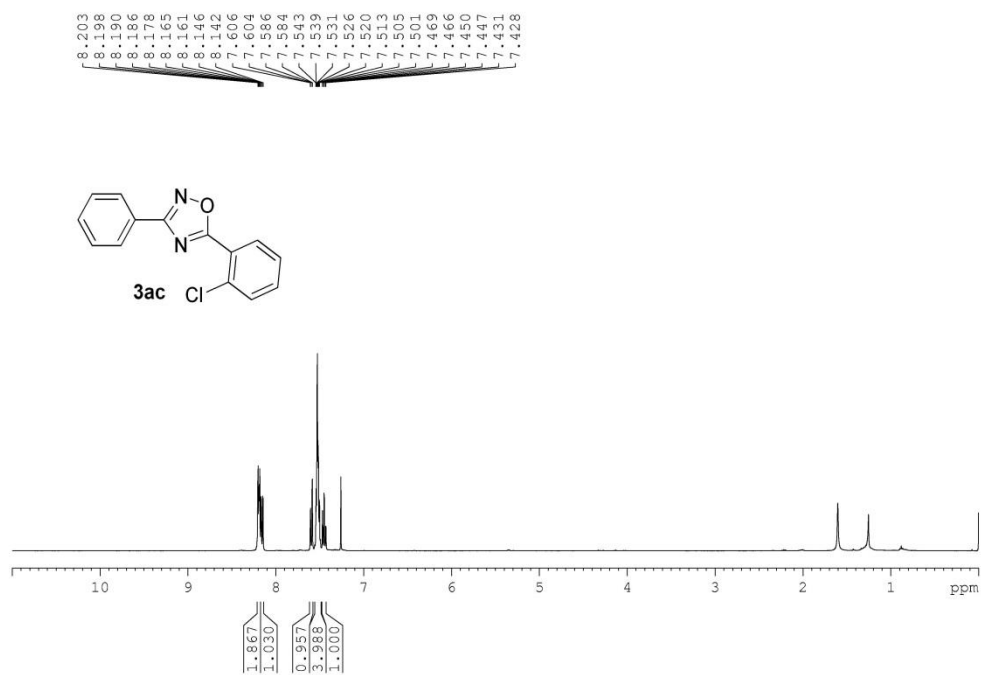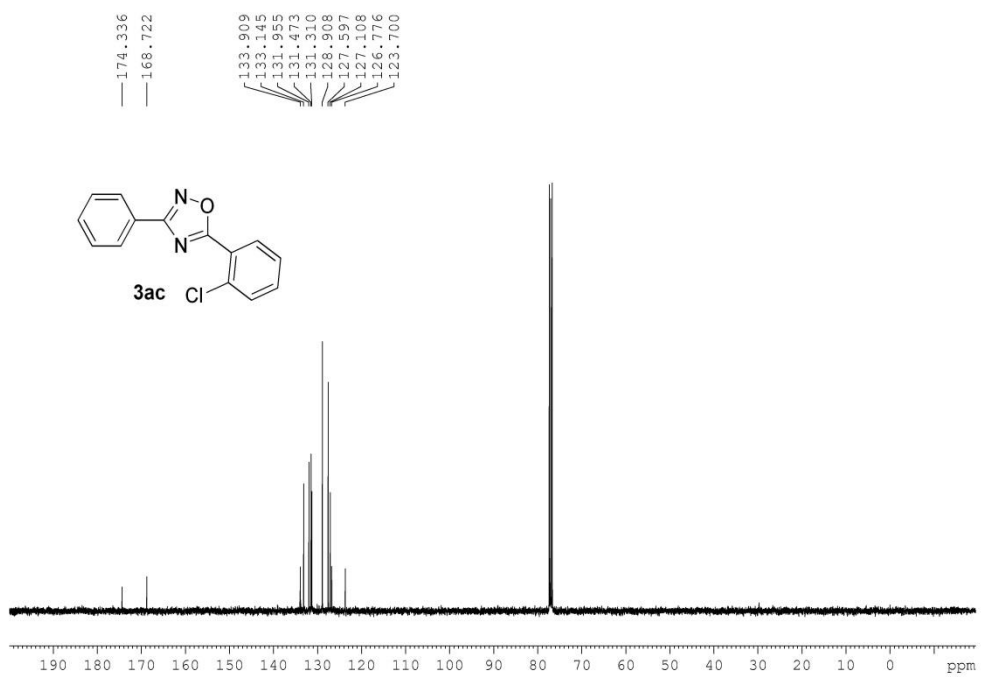

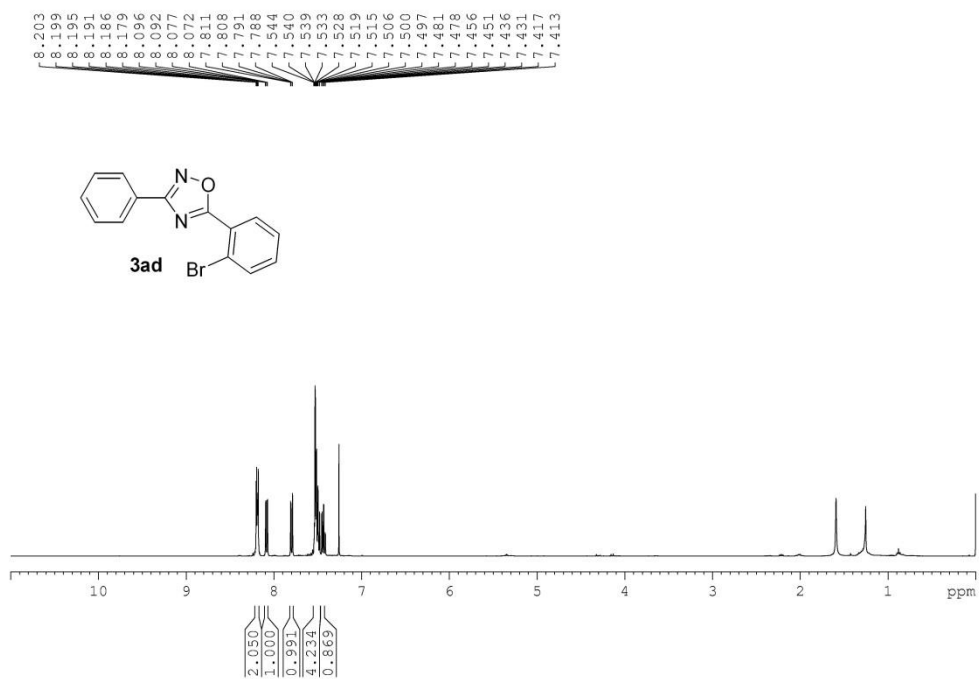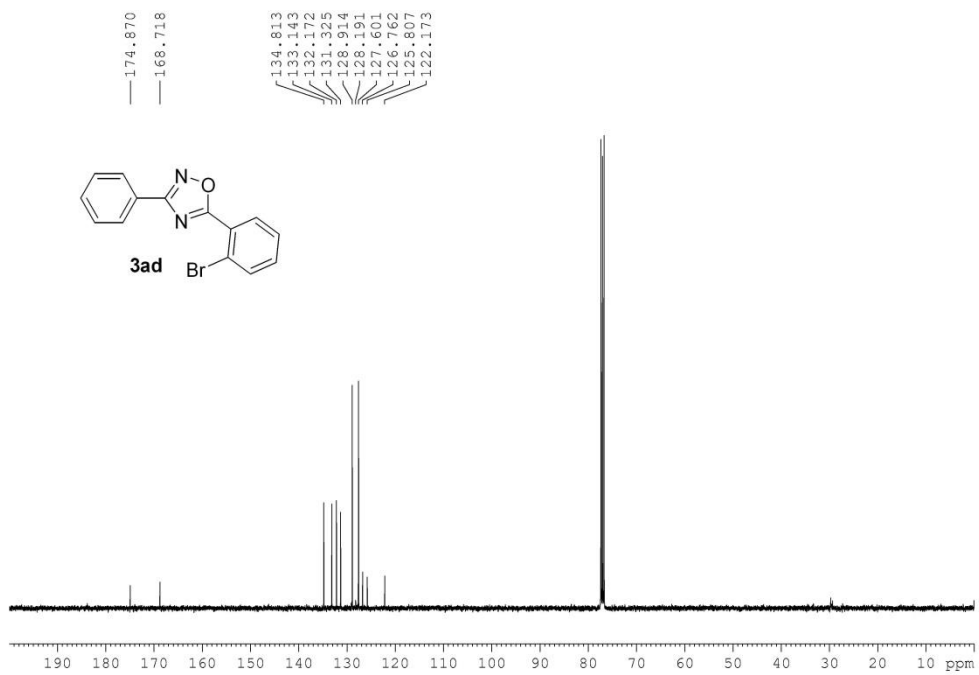

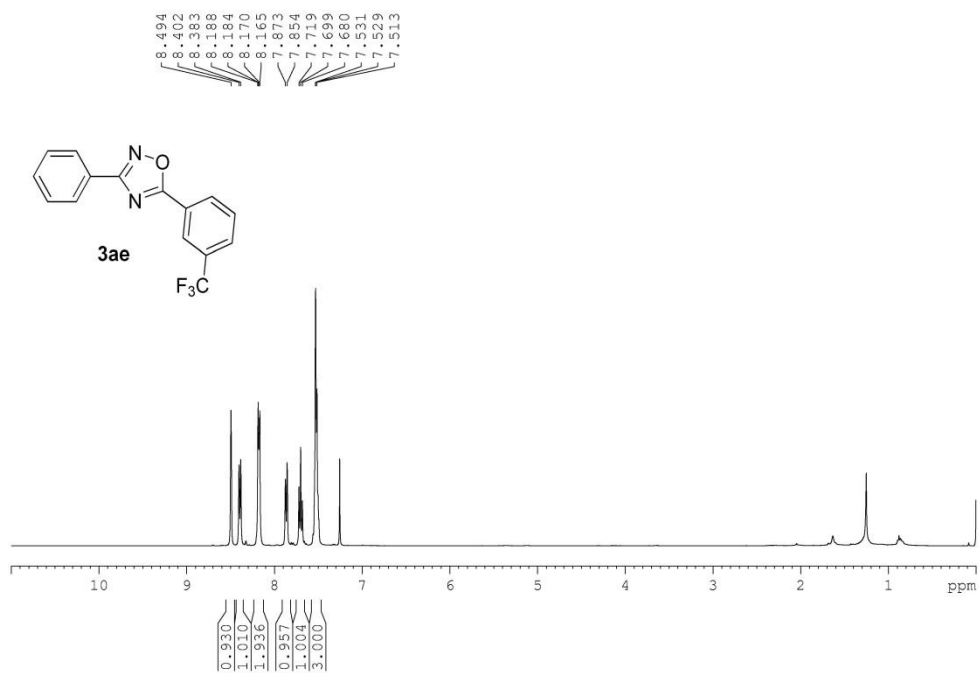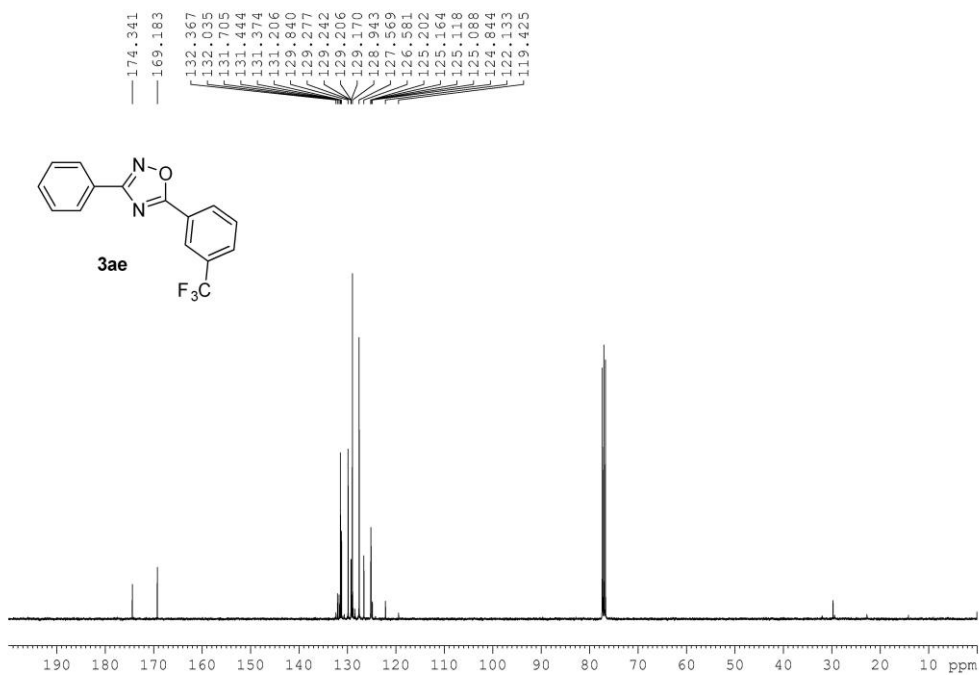

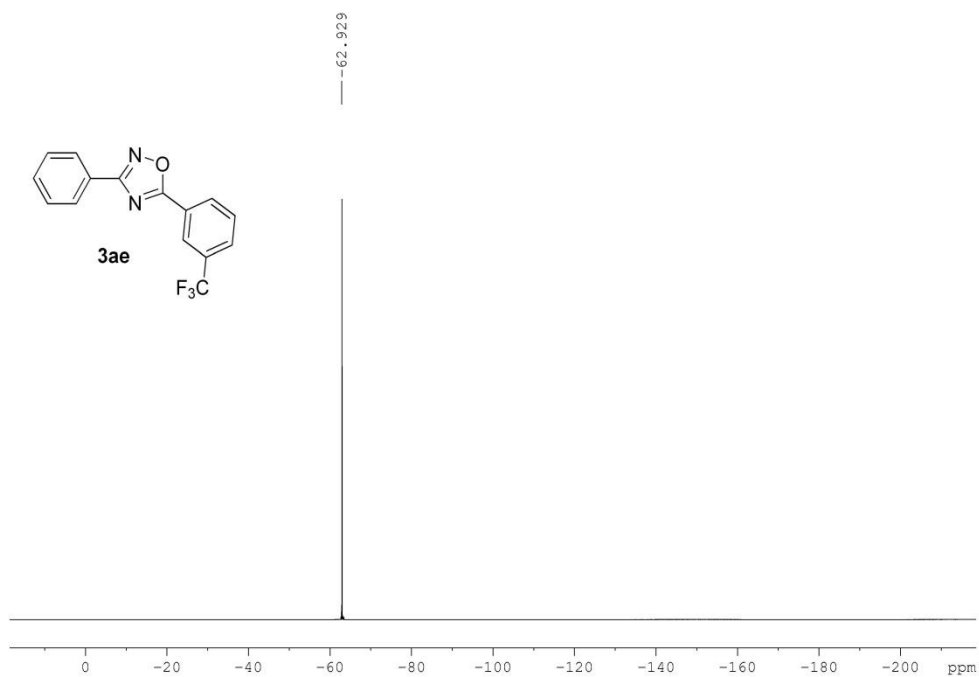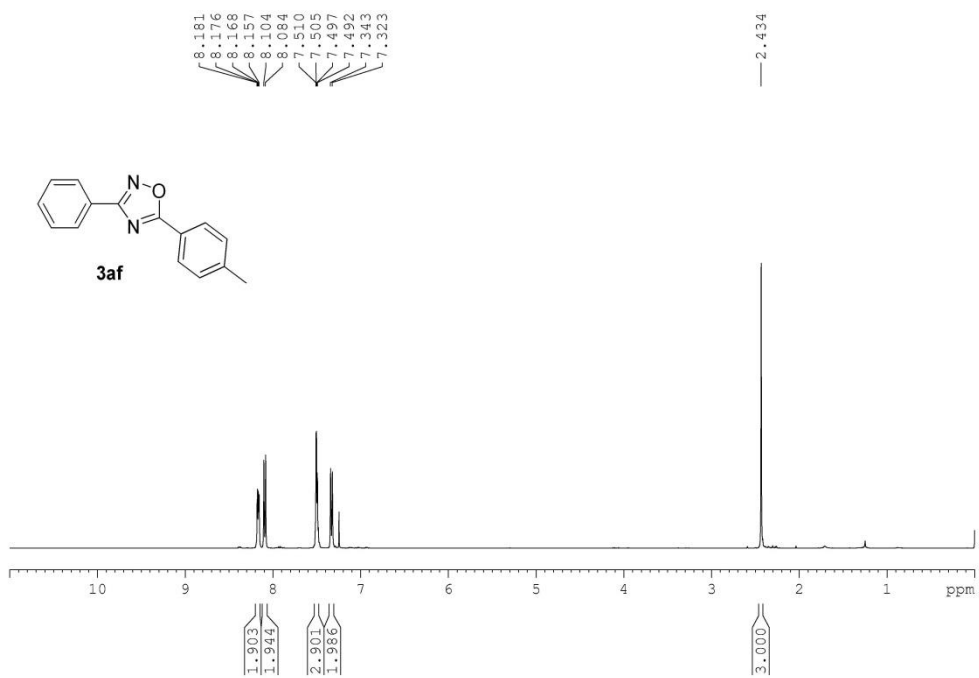

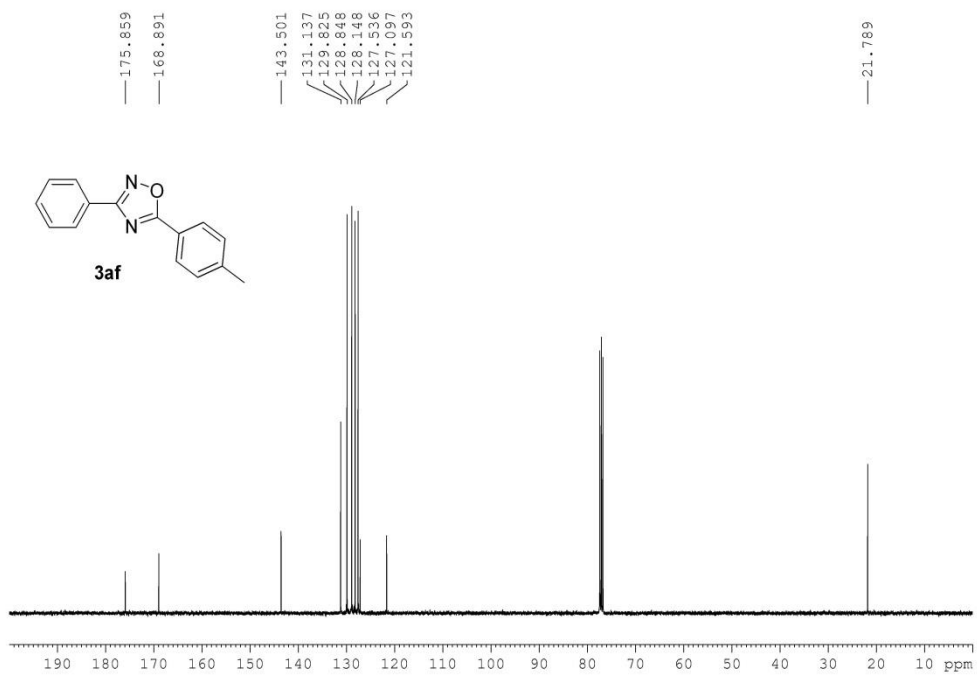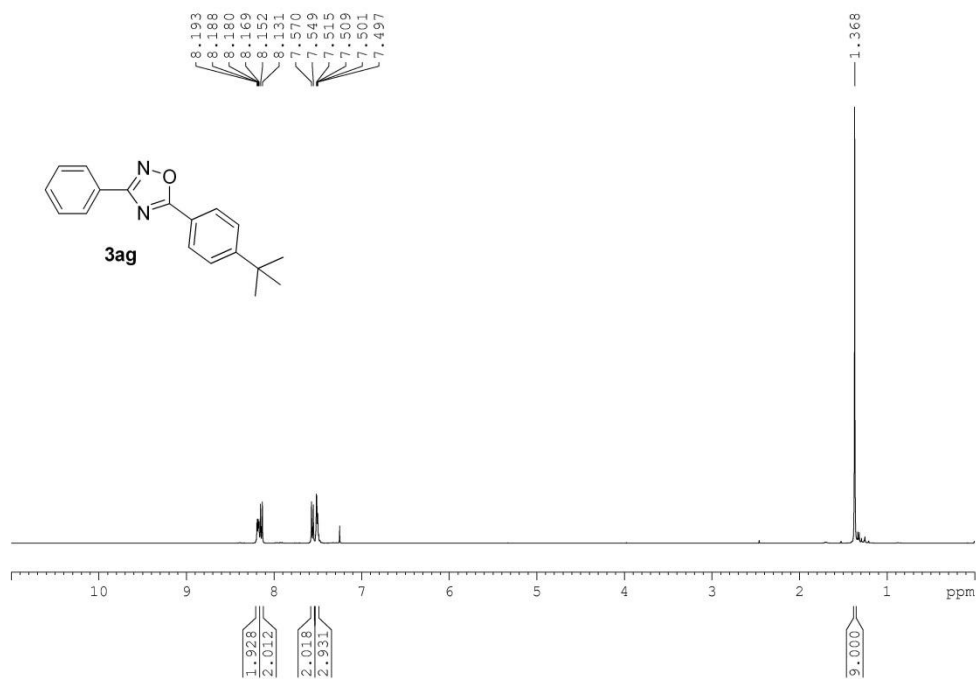

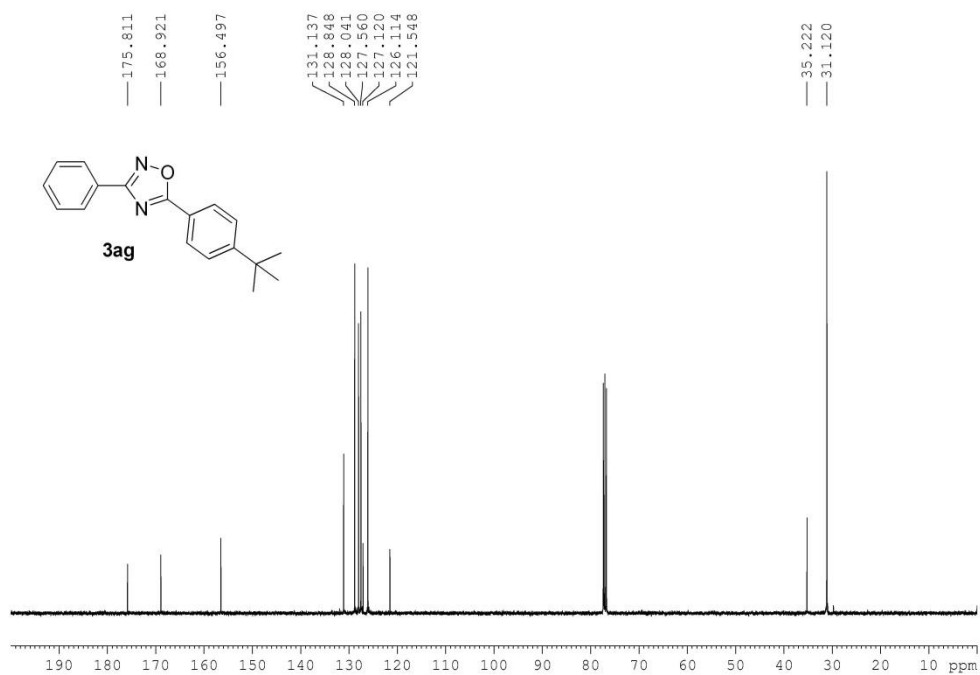

T: FTMS + p ESI Full lock ms [80.0000-1200.0000]

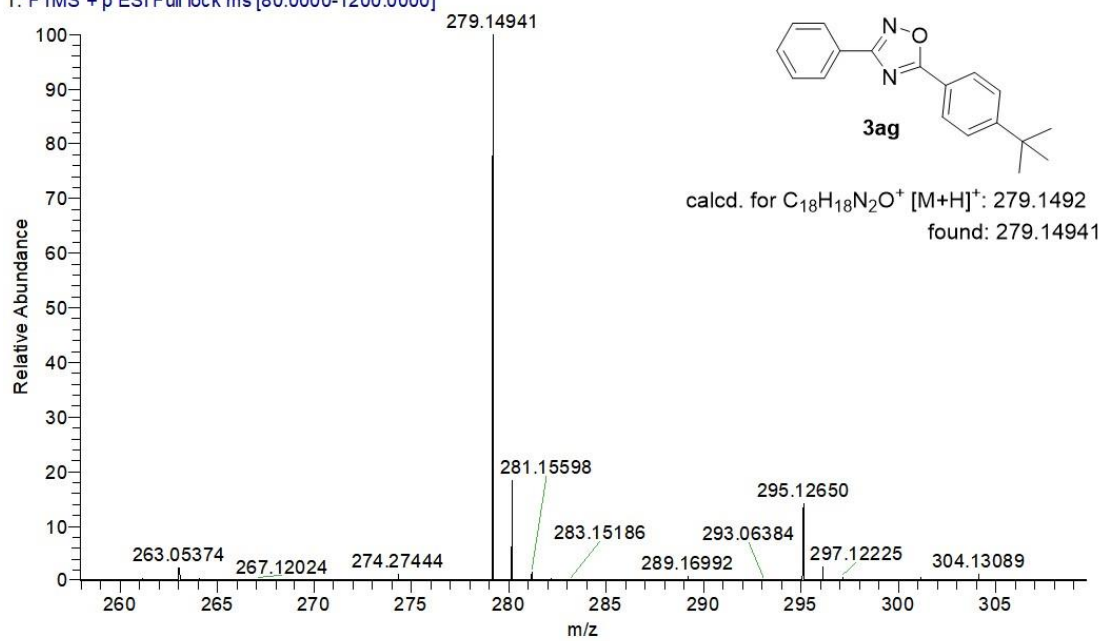

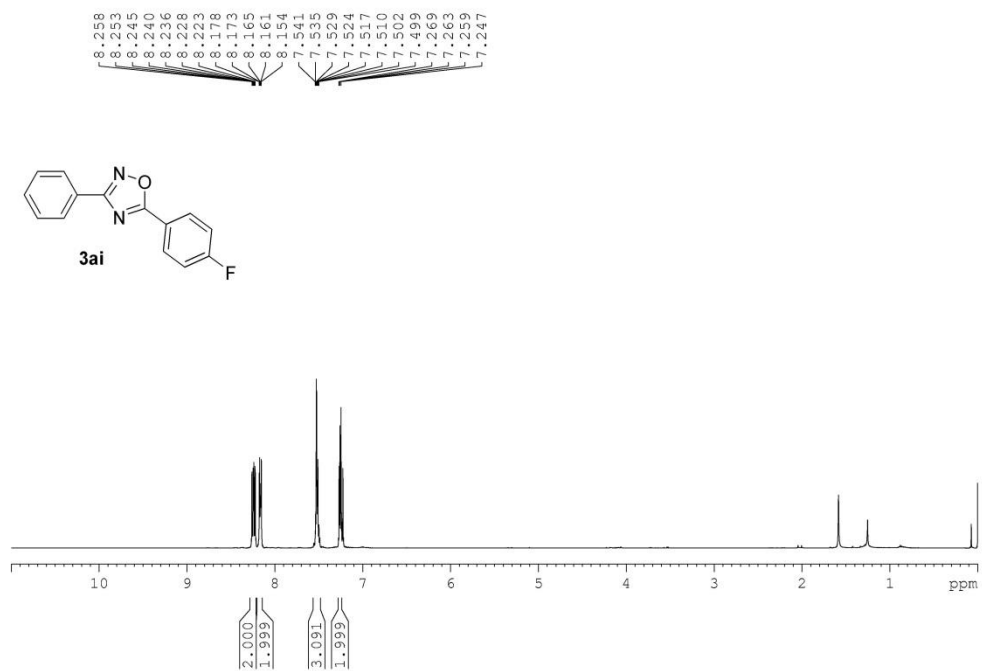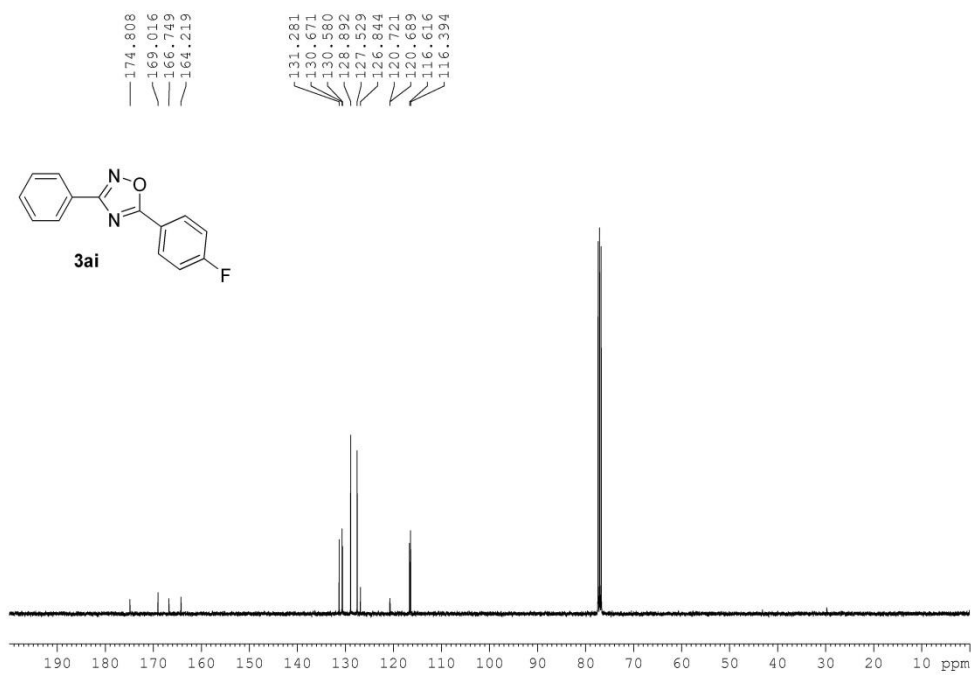

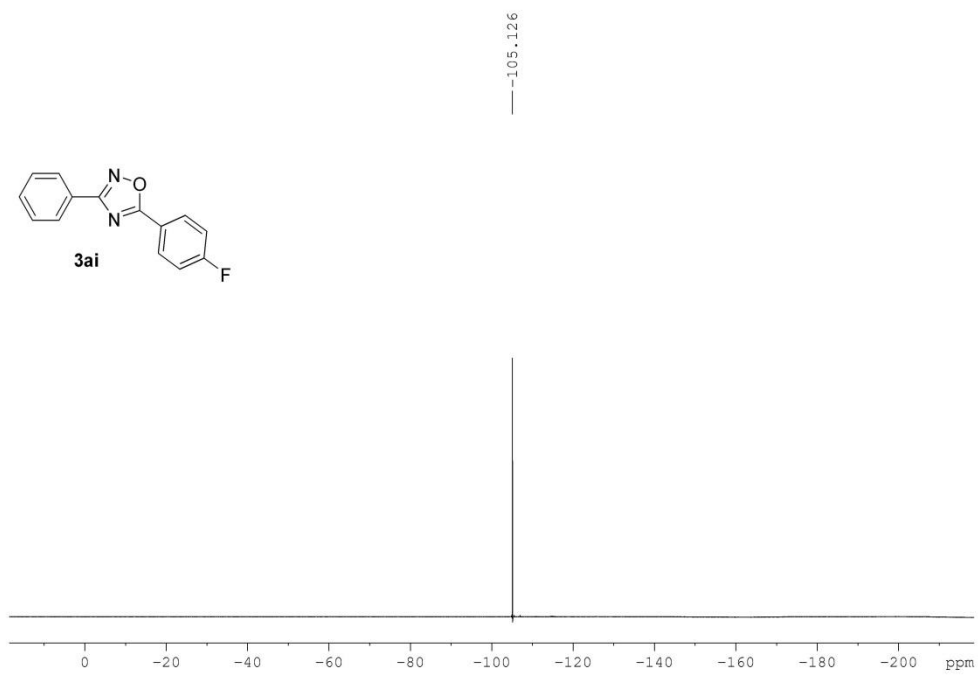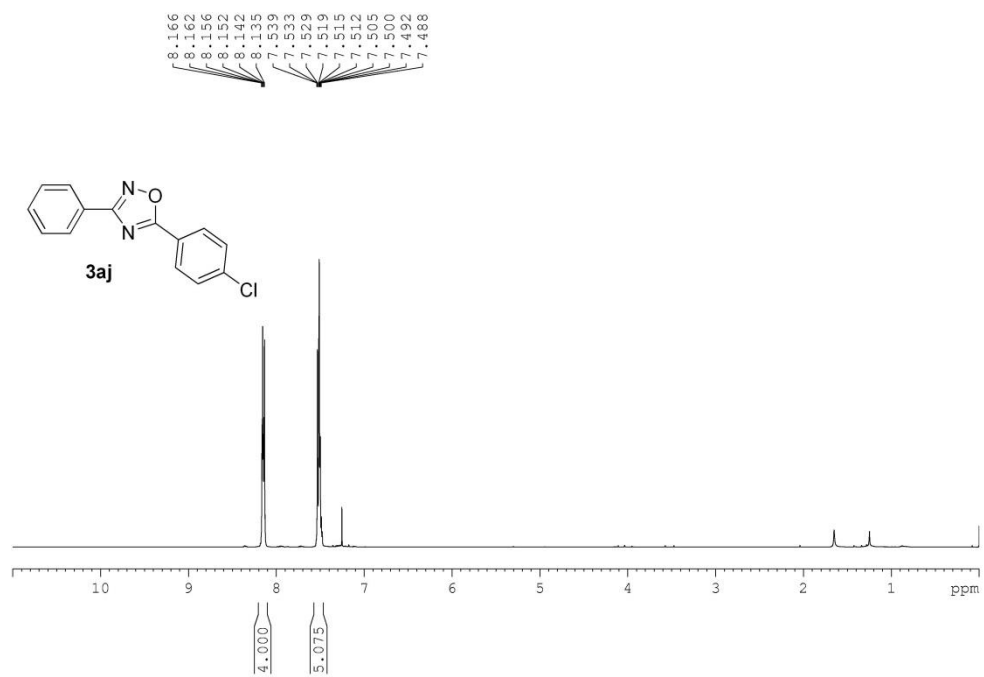



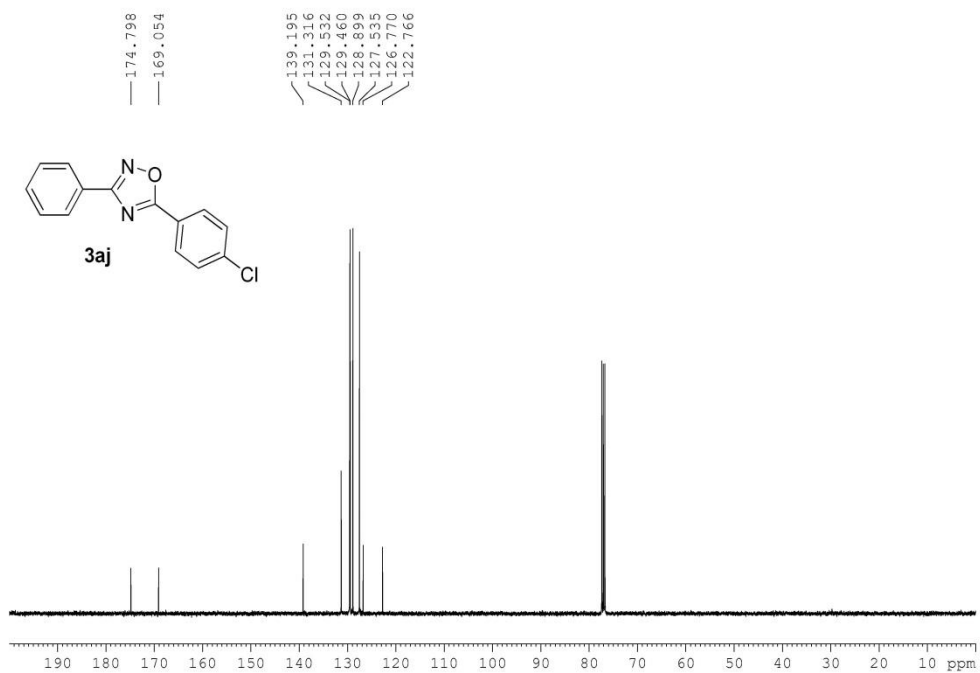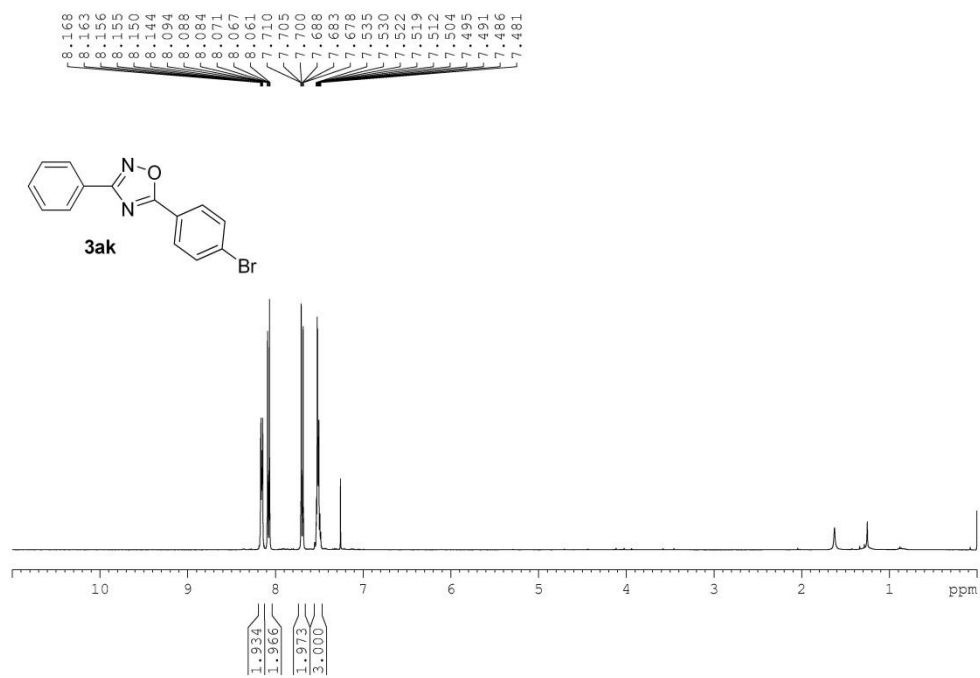

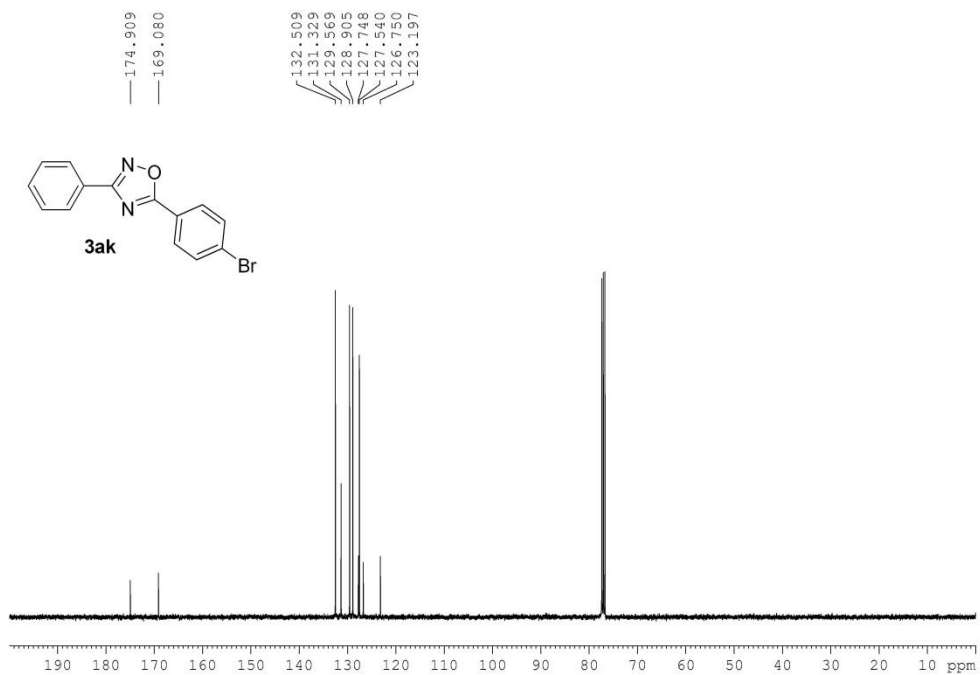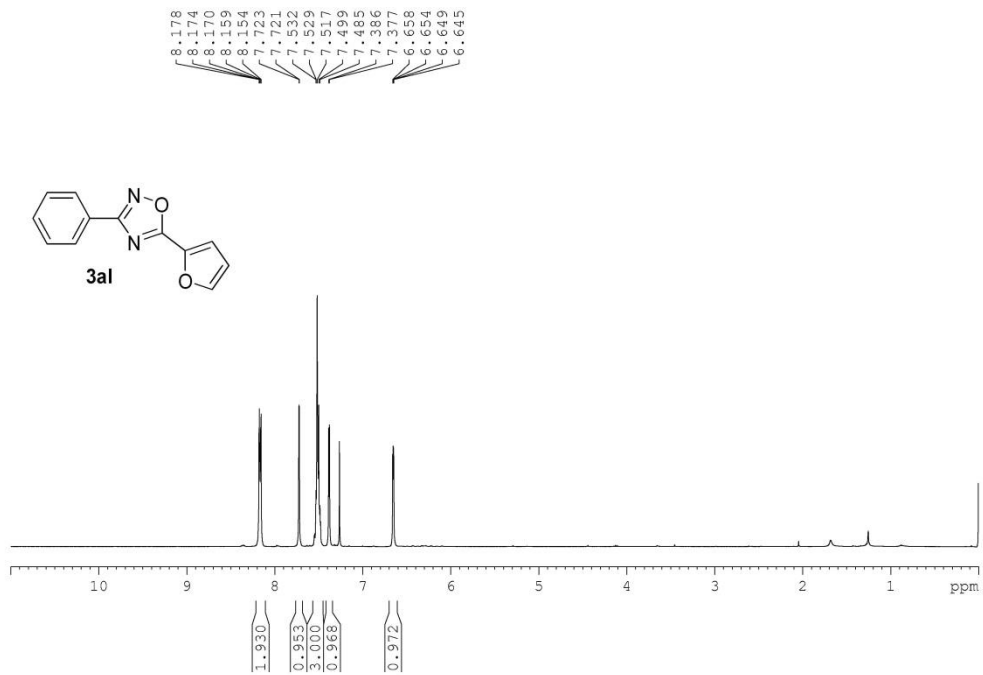

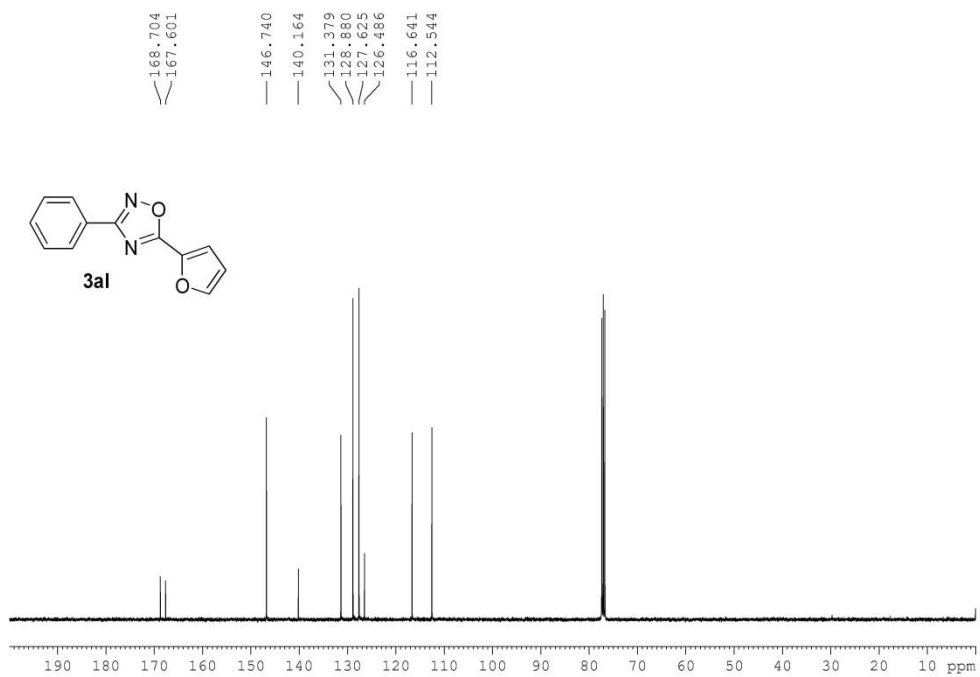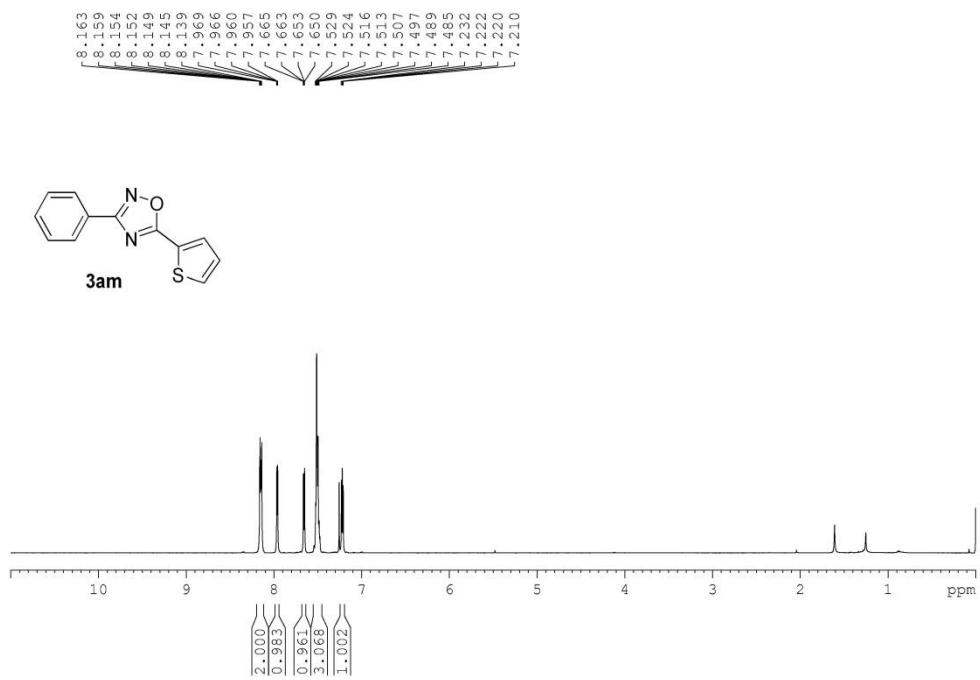

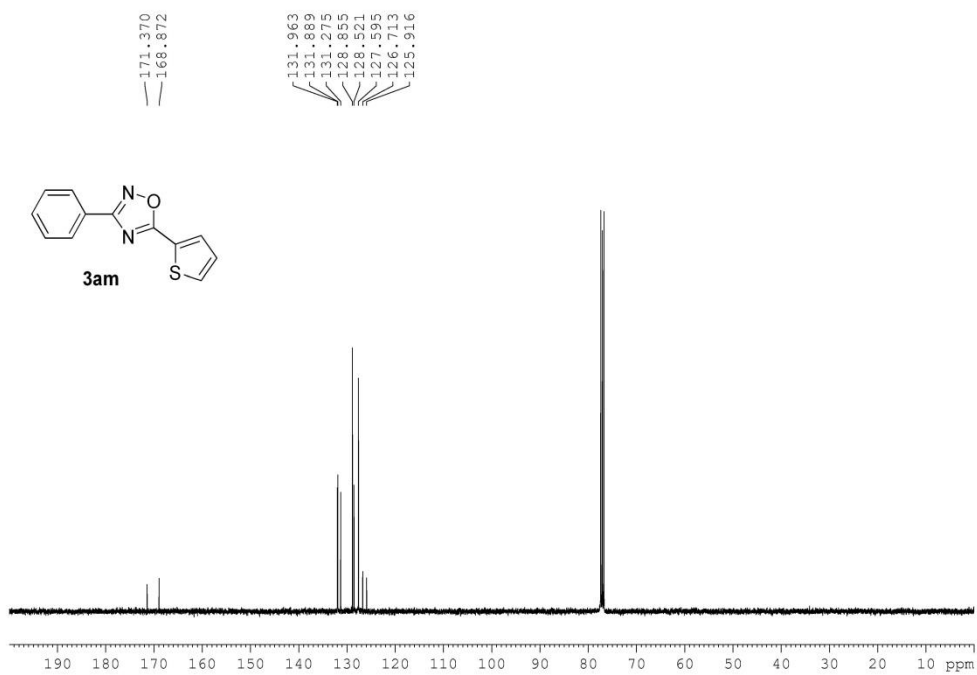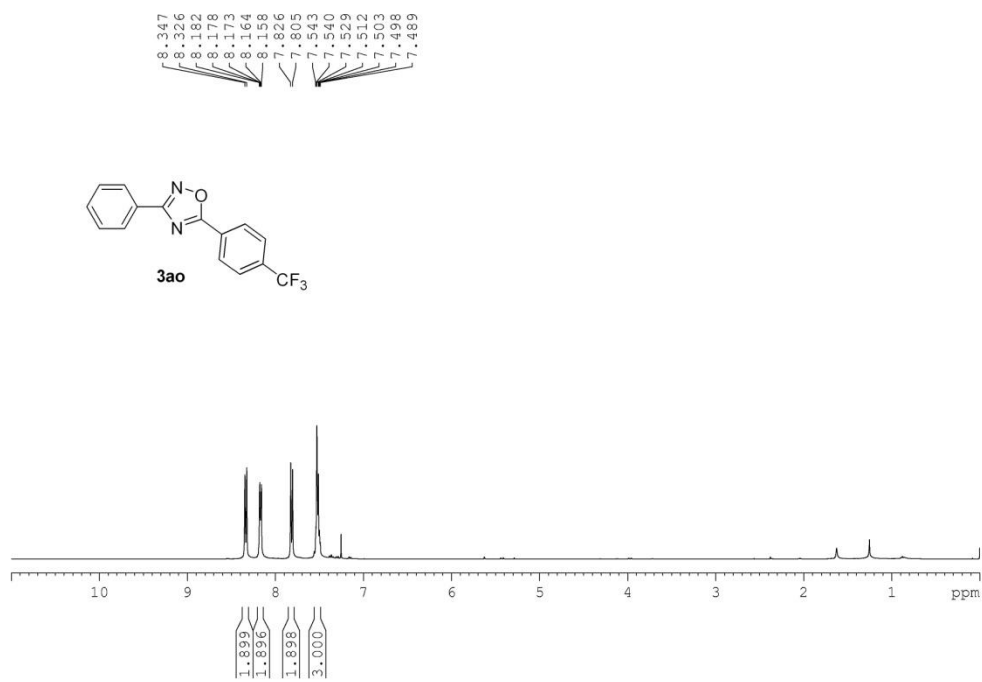

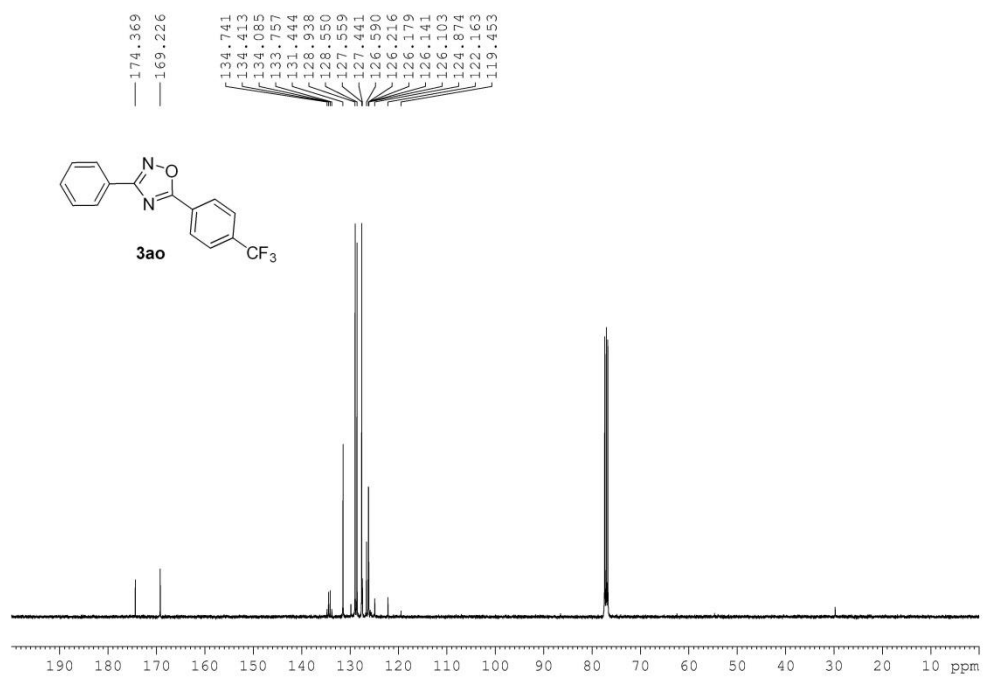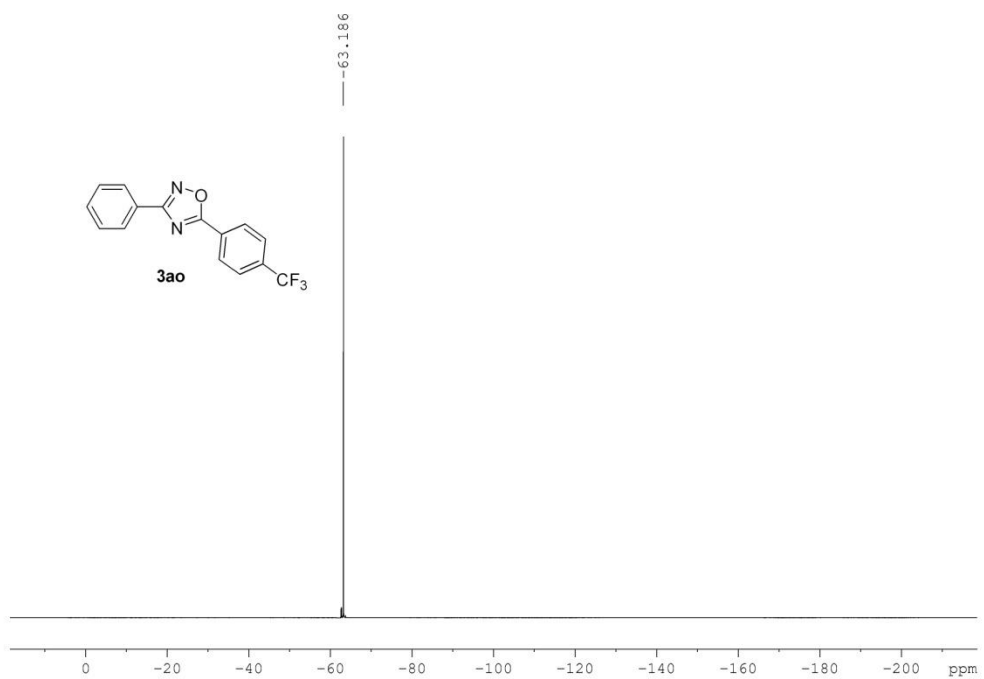

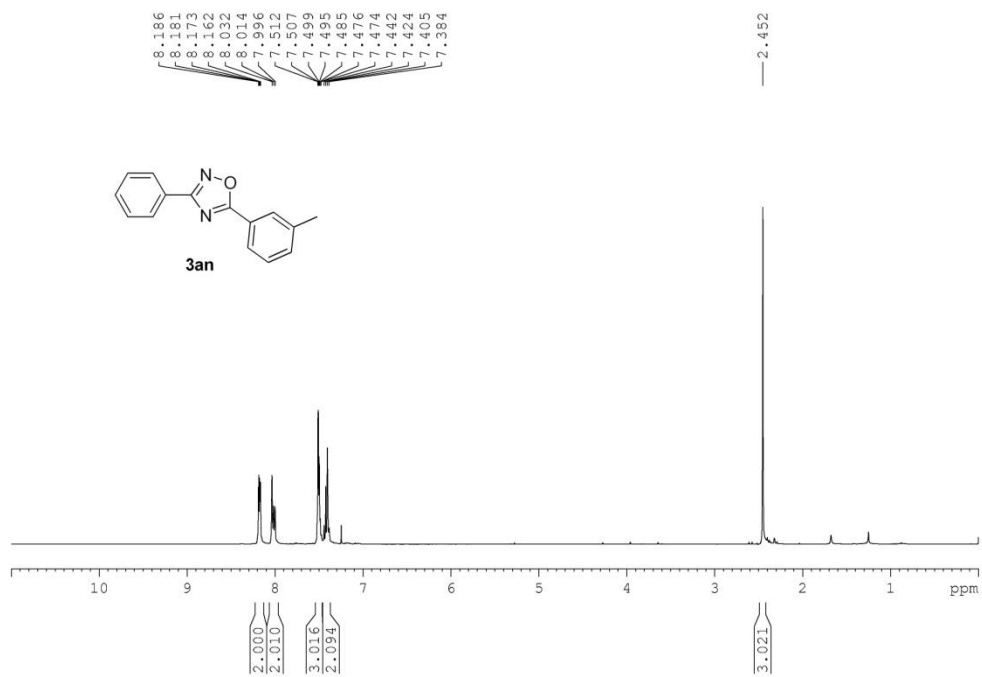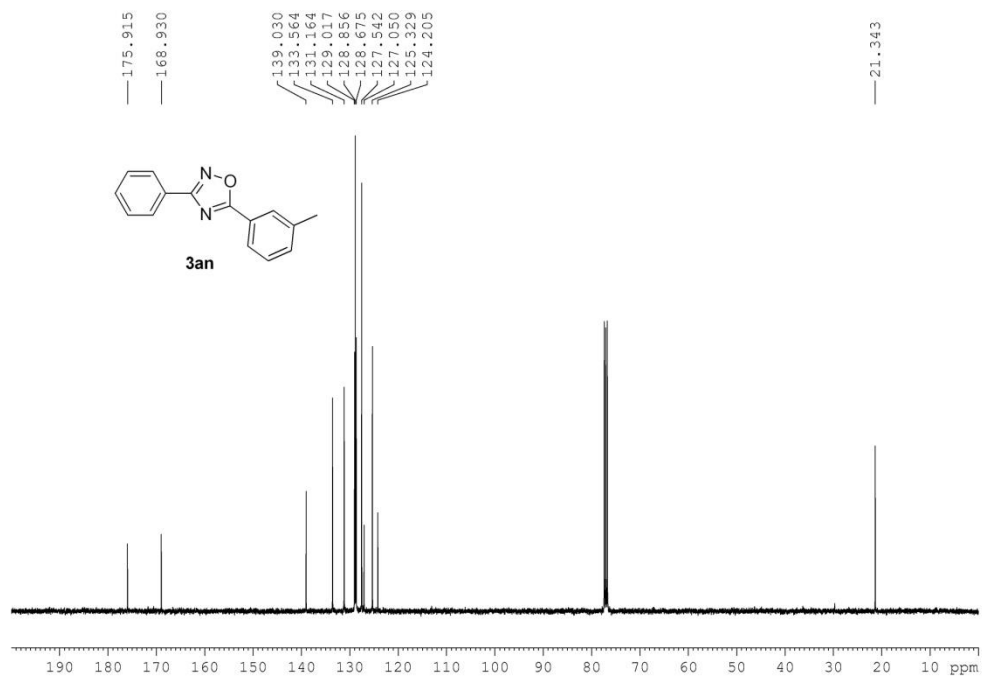

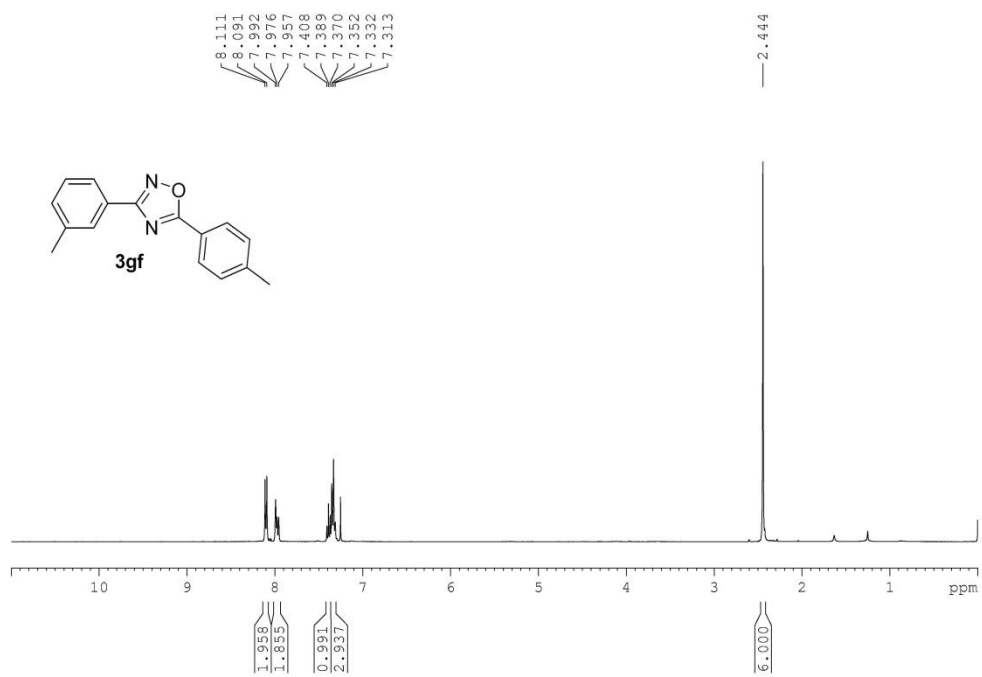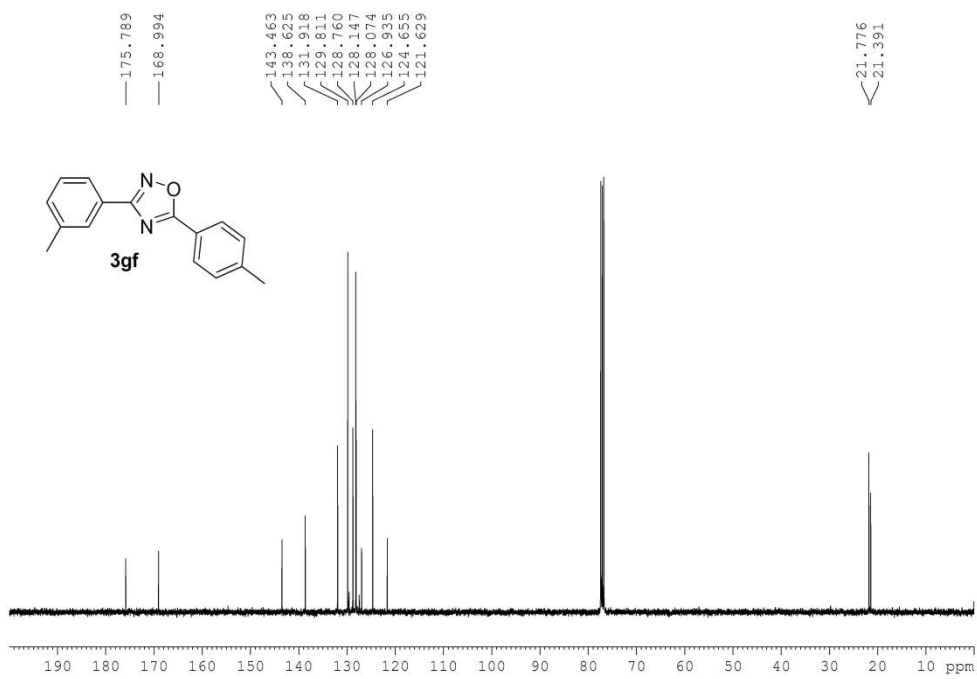

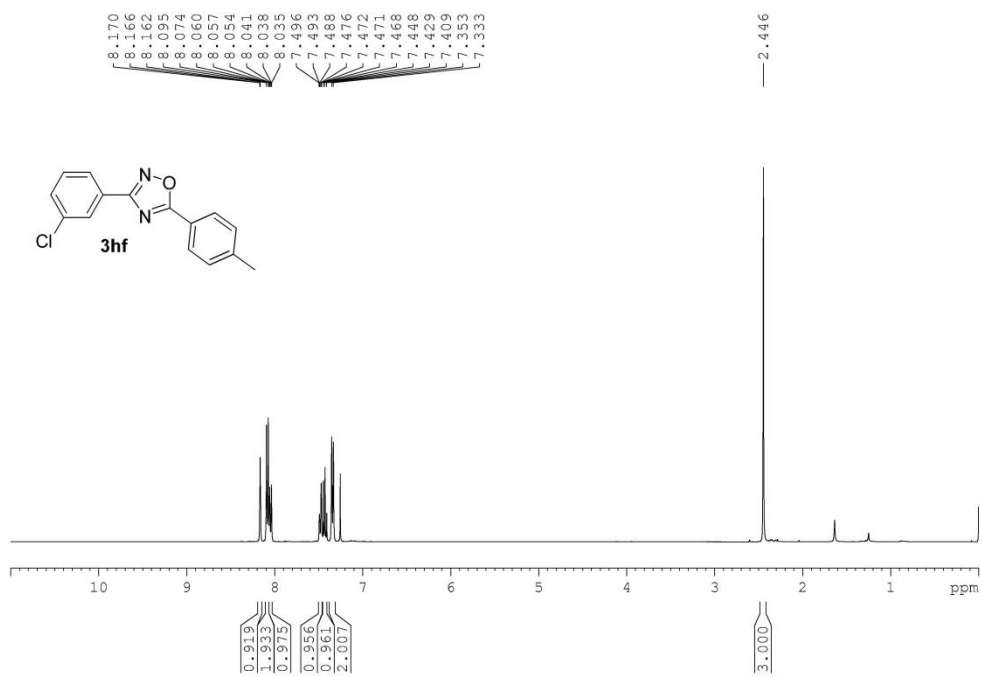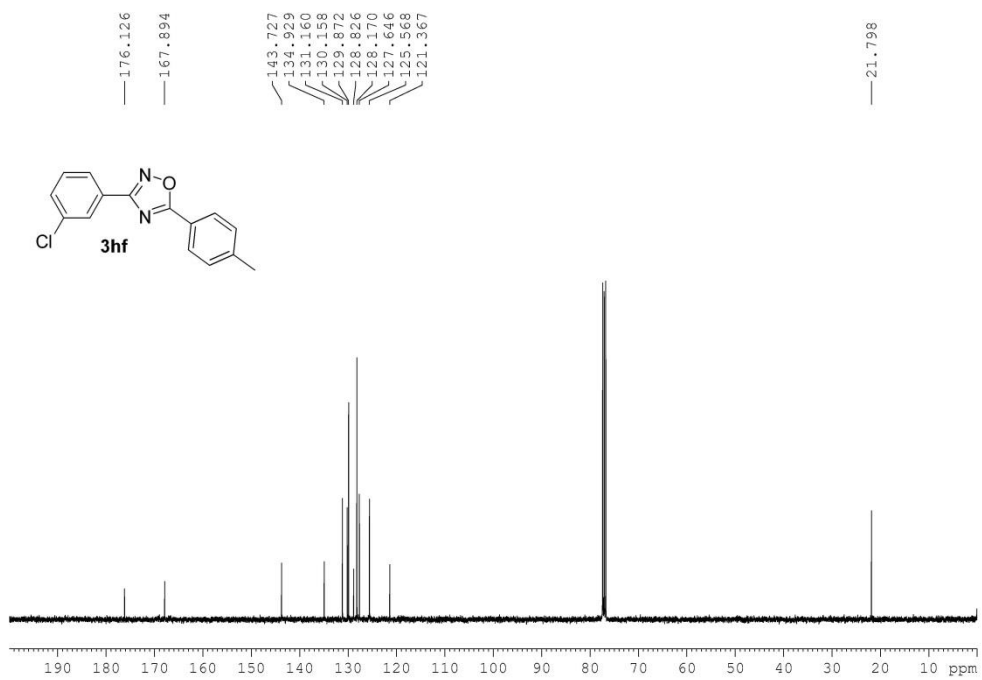



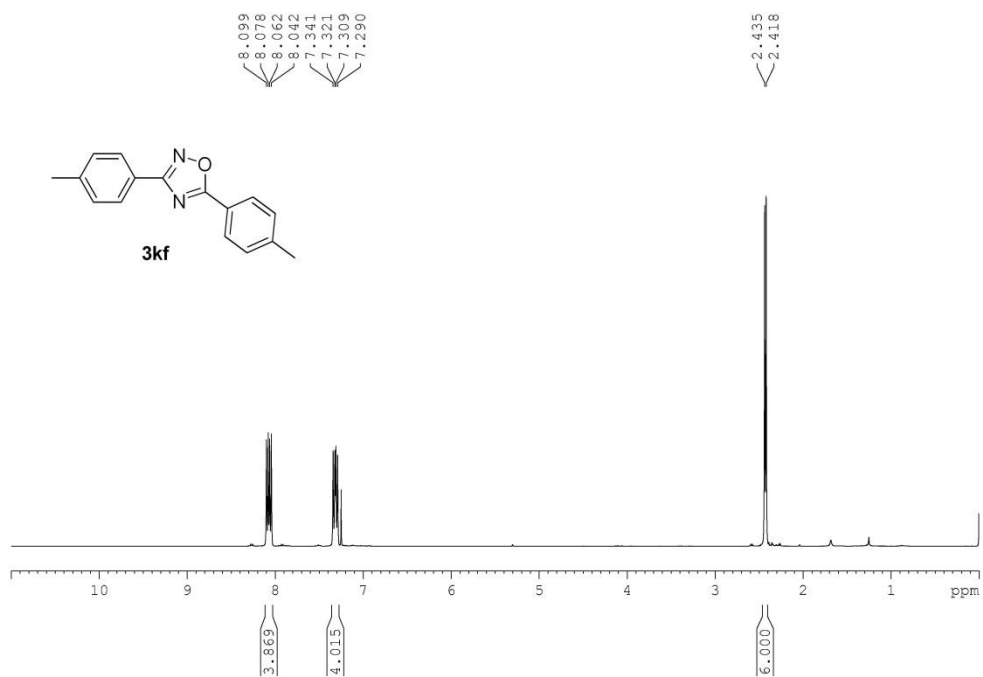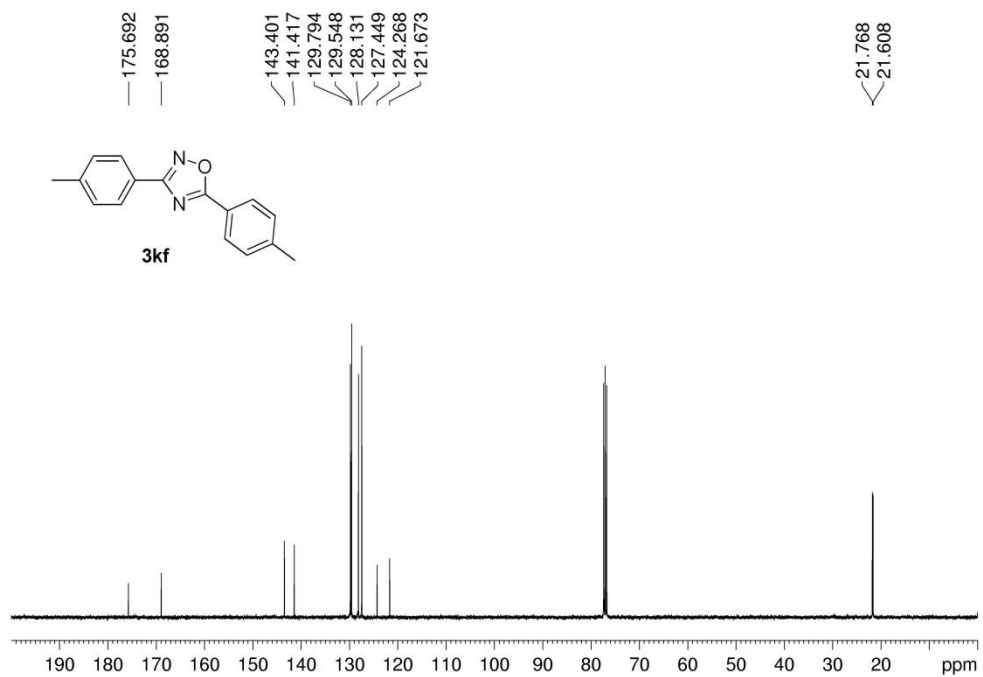

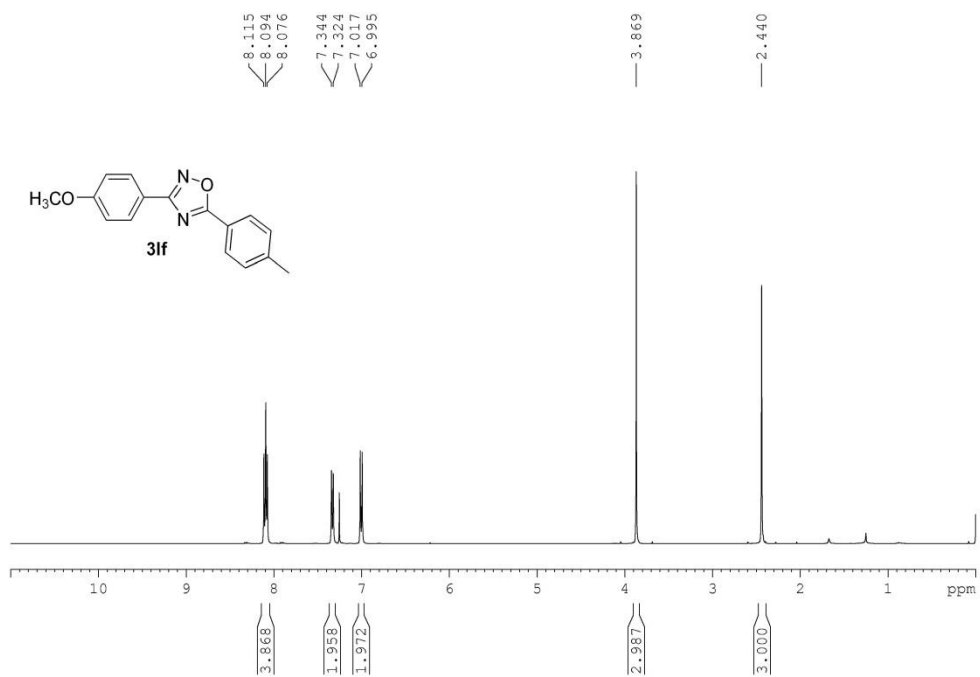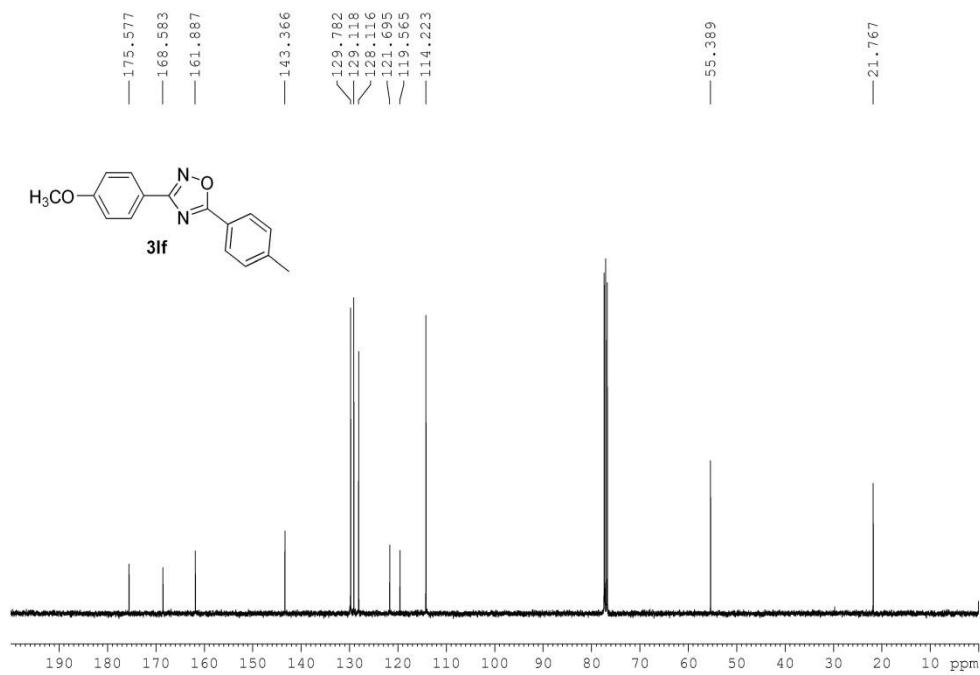

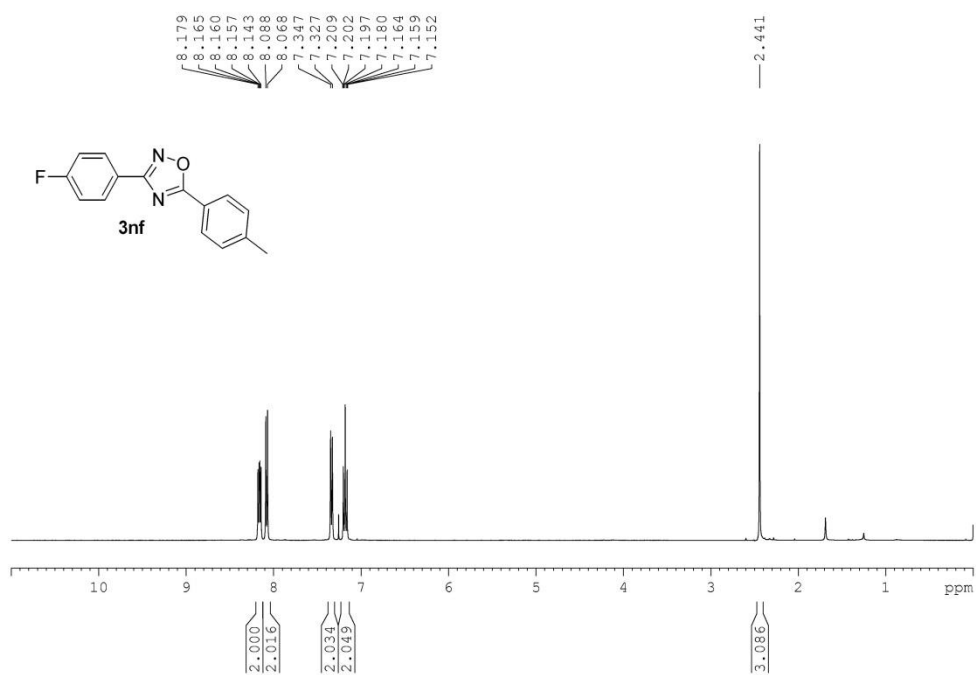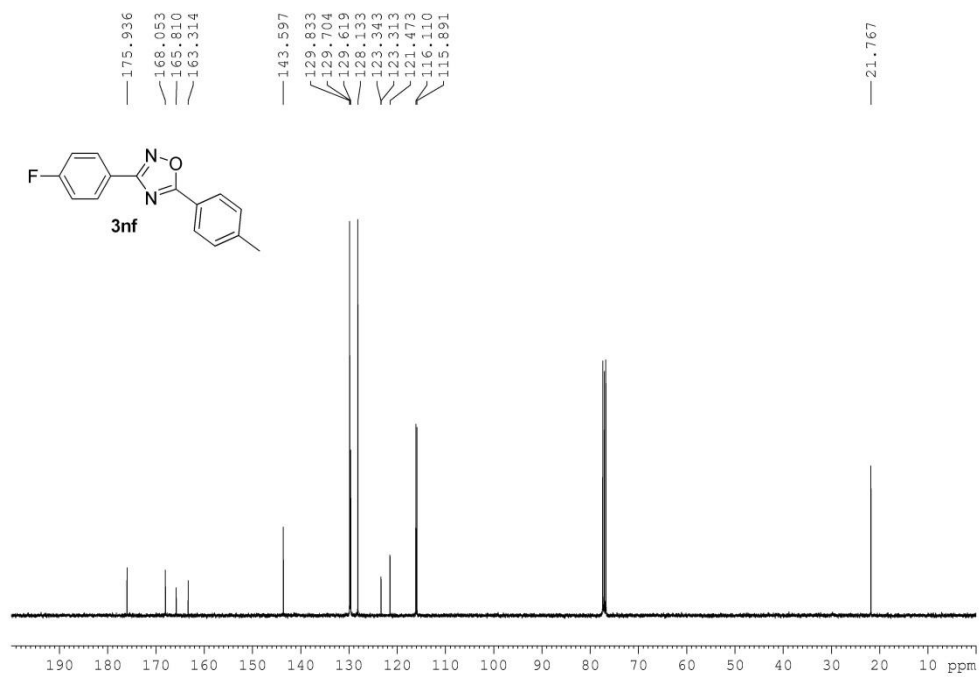

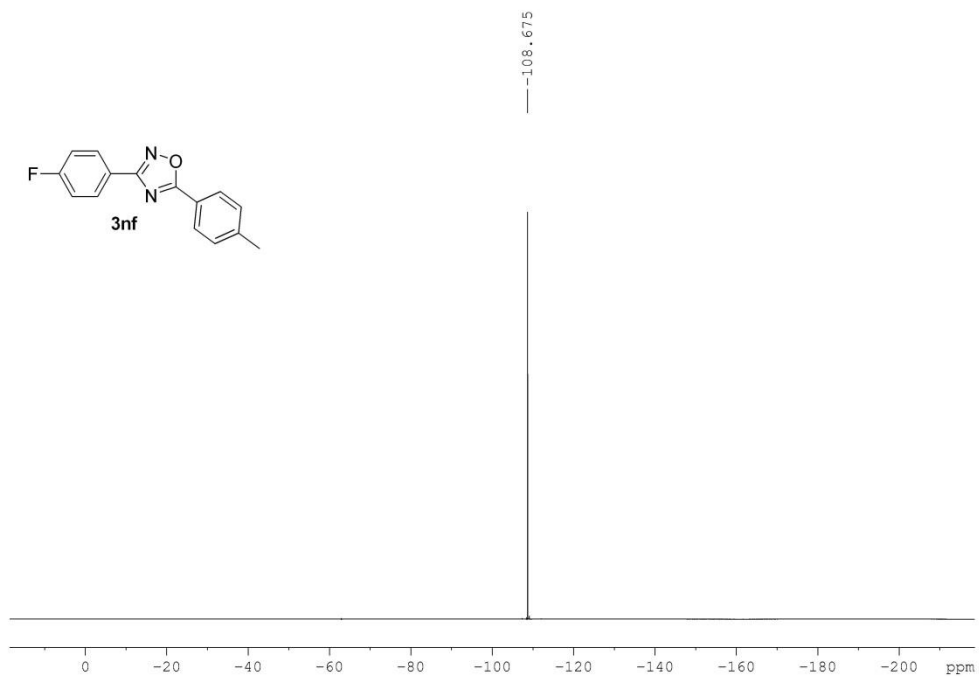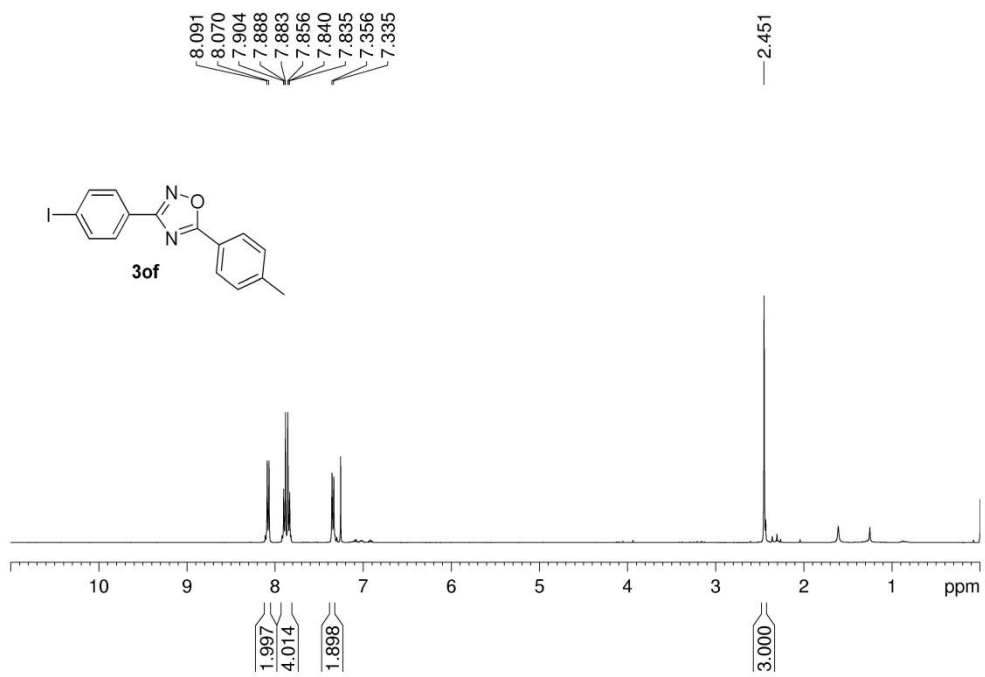

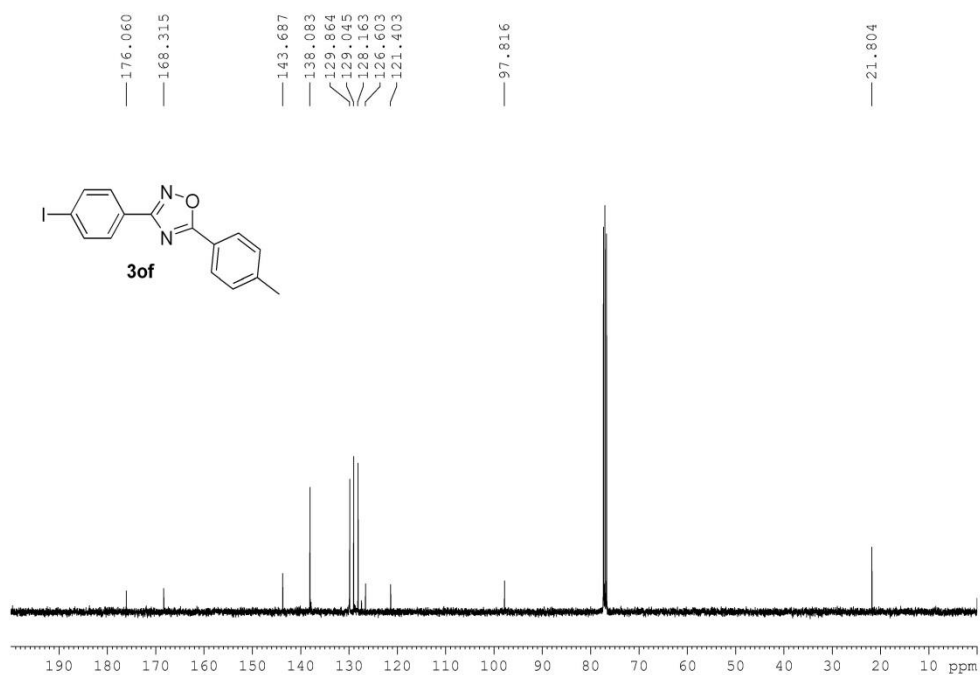

T: FTMS + p ESI Full lock ms [80.0000-1200.0000]

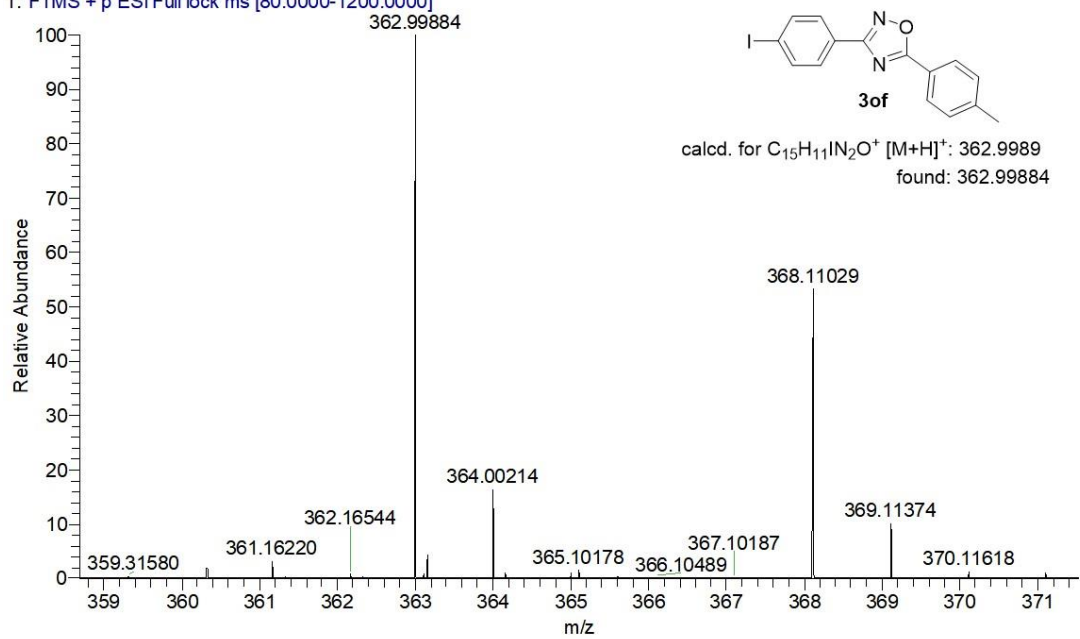

8.495  
8.409  
8.389  
8.312  
8.291  
7.899  
7.879  
7.790  
7.769  
7.742  
7.722  
7.702

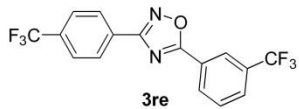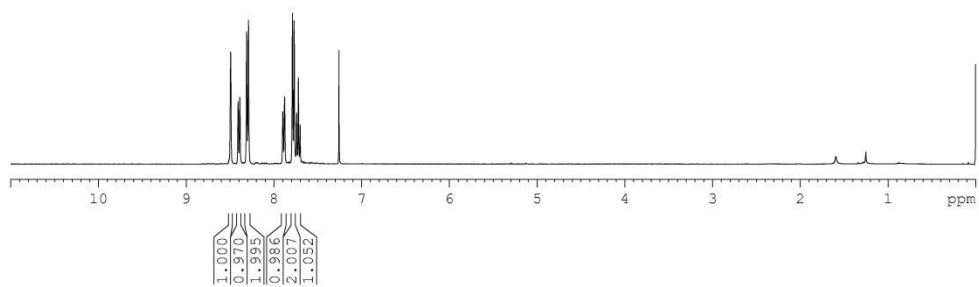

174.842  
168.189  
158.664  
153.538  
153.013  
132.688  
132.515  
132.185  
131.853  
131.522  
131.256  
129.955  
129.565  
129.530  
129.494  
129.458  
128.708  
127.946  
127.839  
127.513  
126.009  
125.973  
125.926  
125.868  
125.264  
125.226  
125.167  
125.148  
124.839  
124.805  
122.422  
122.094  
119.714  
119.385

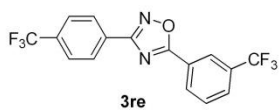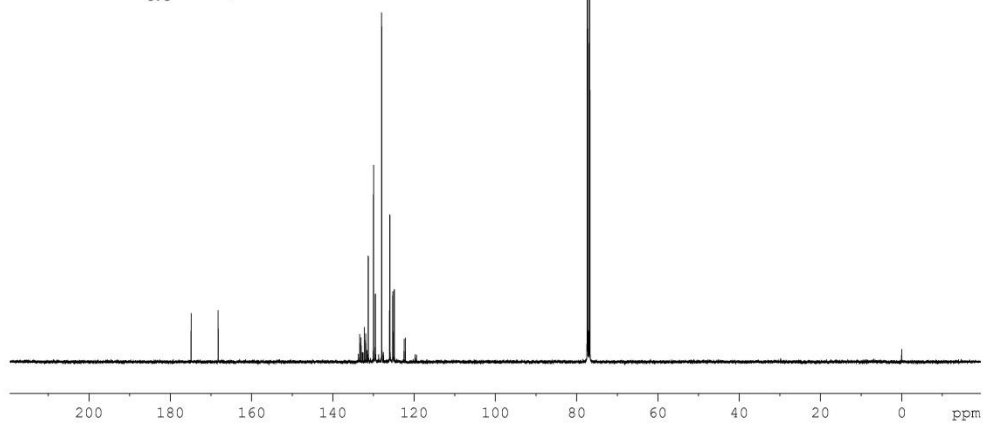

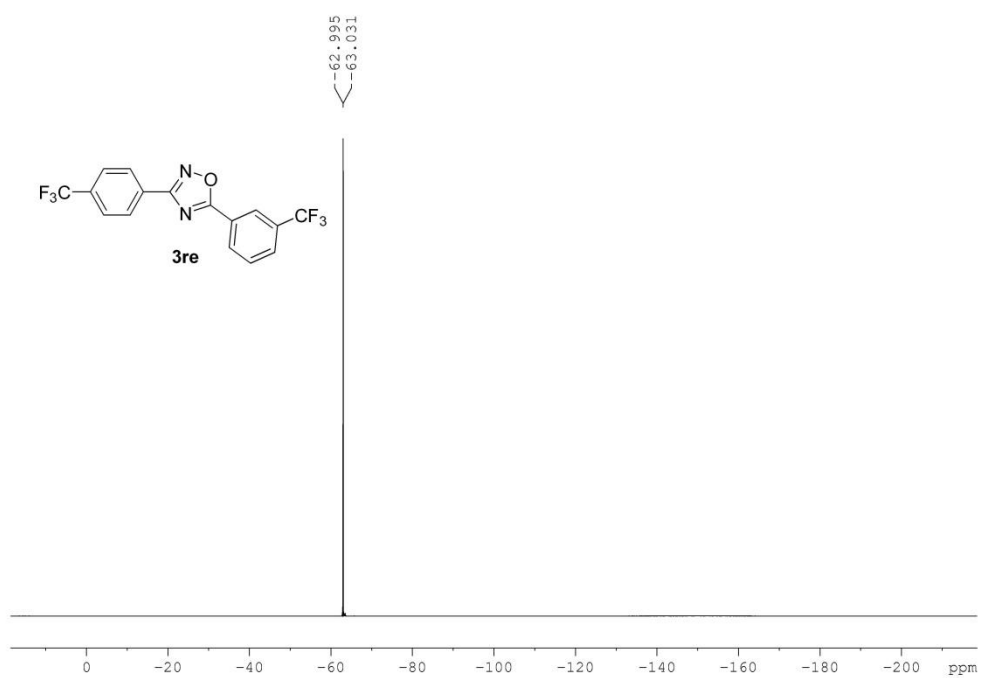

T: FTMS + p ESI Full lock ms [80.0000-1200.0000]

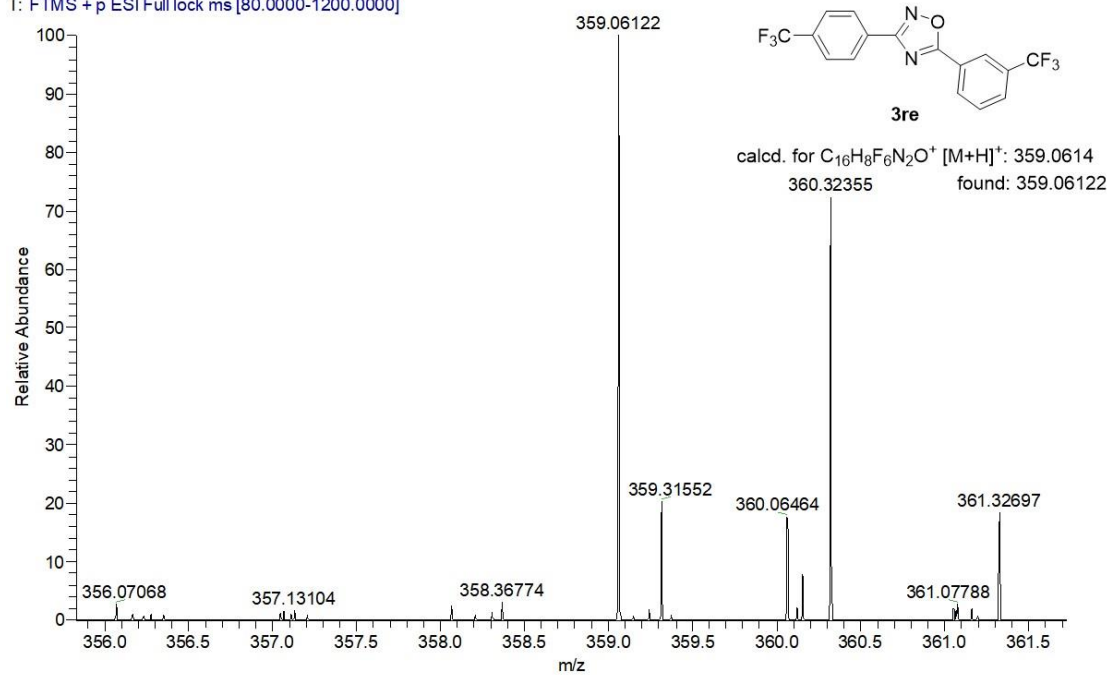

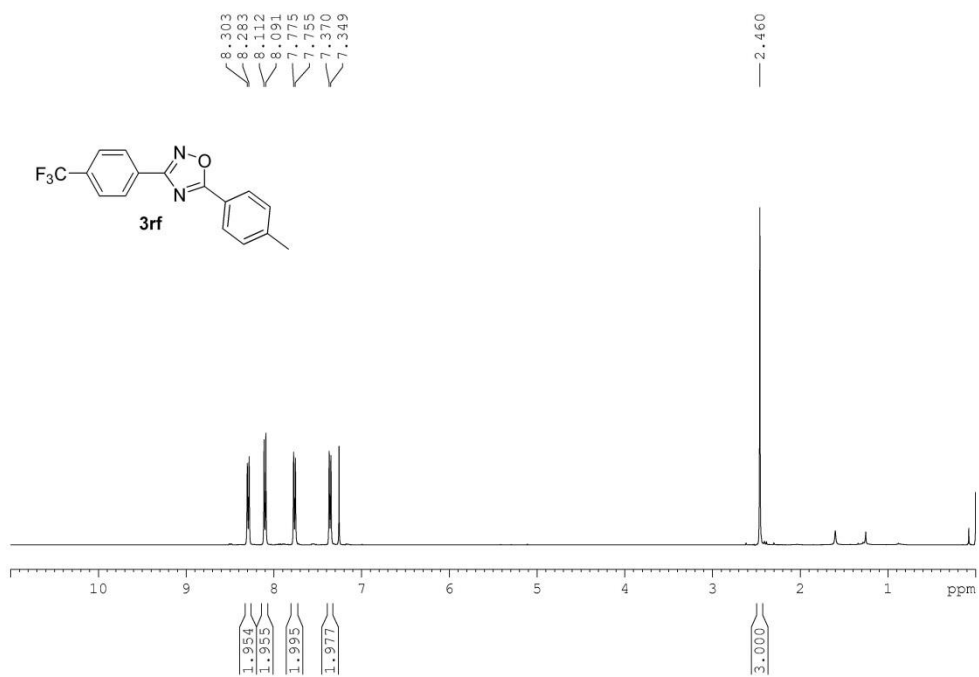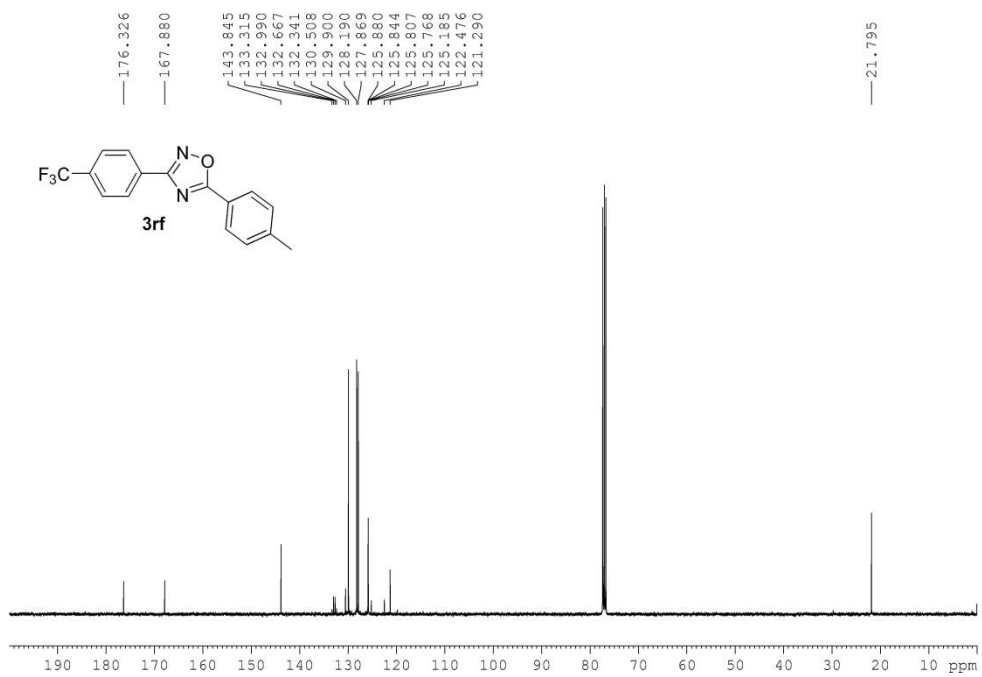



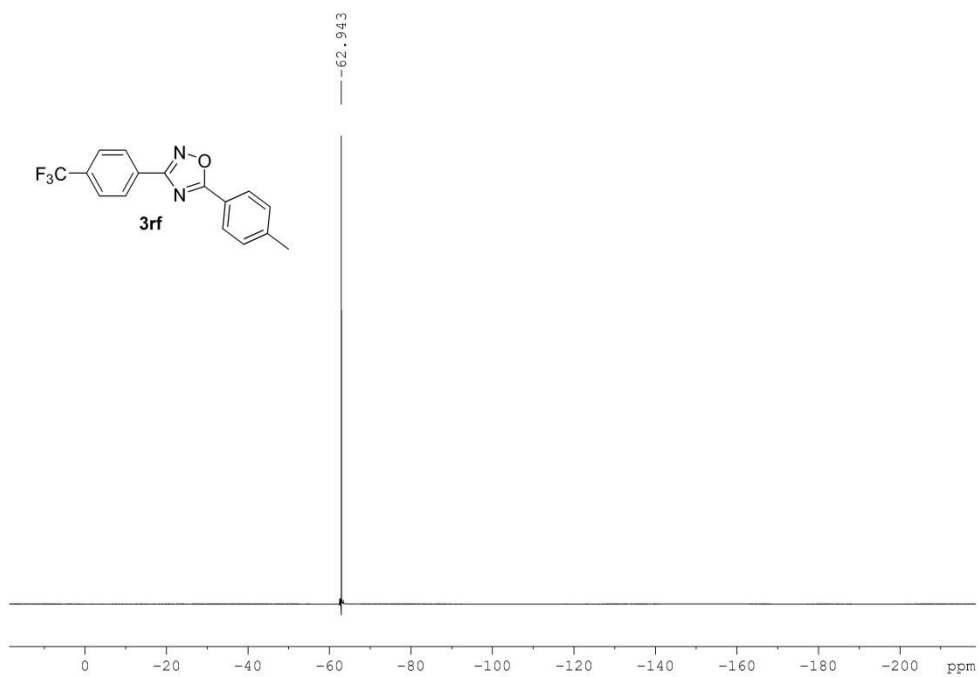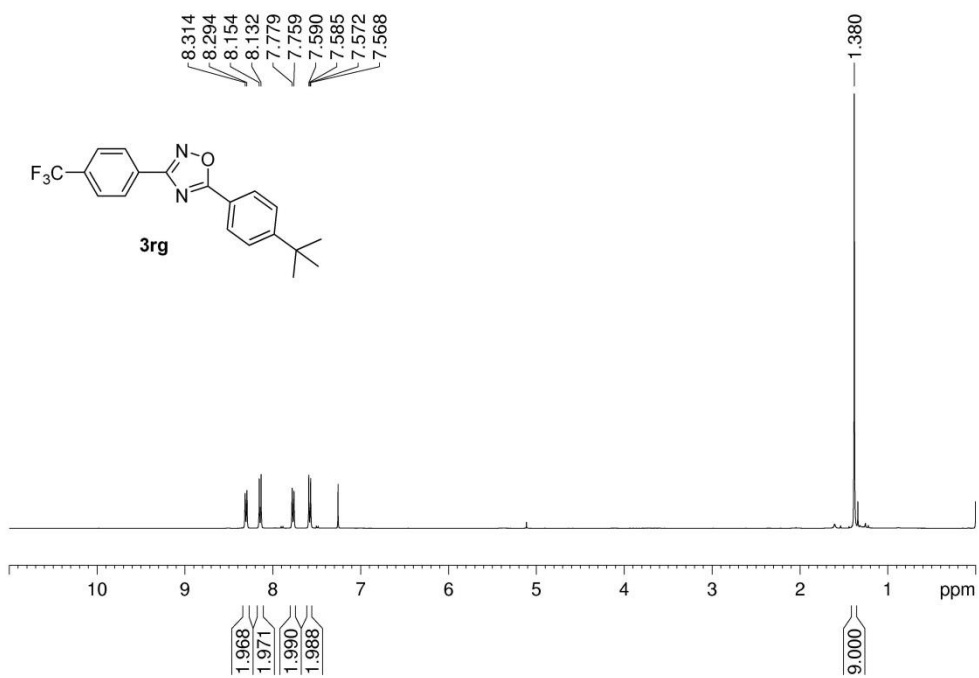

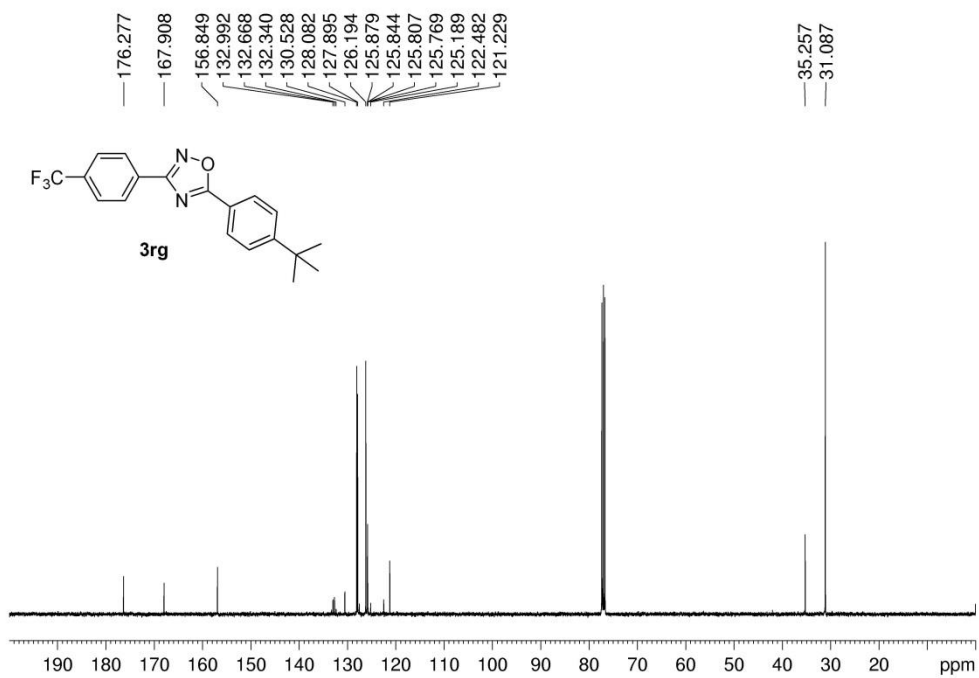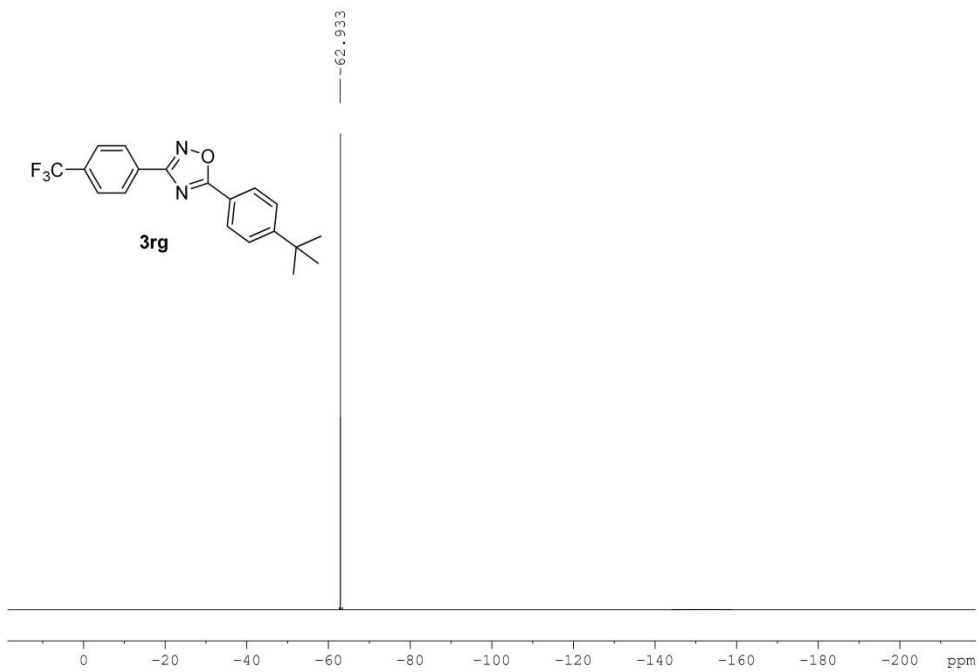

T: FTMS + p ESI Full lock ms [80.0000-1200.0000]

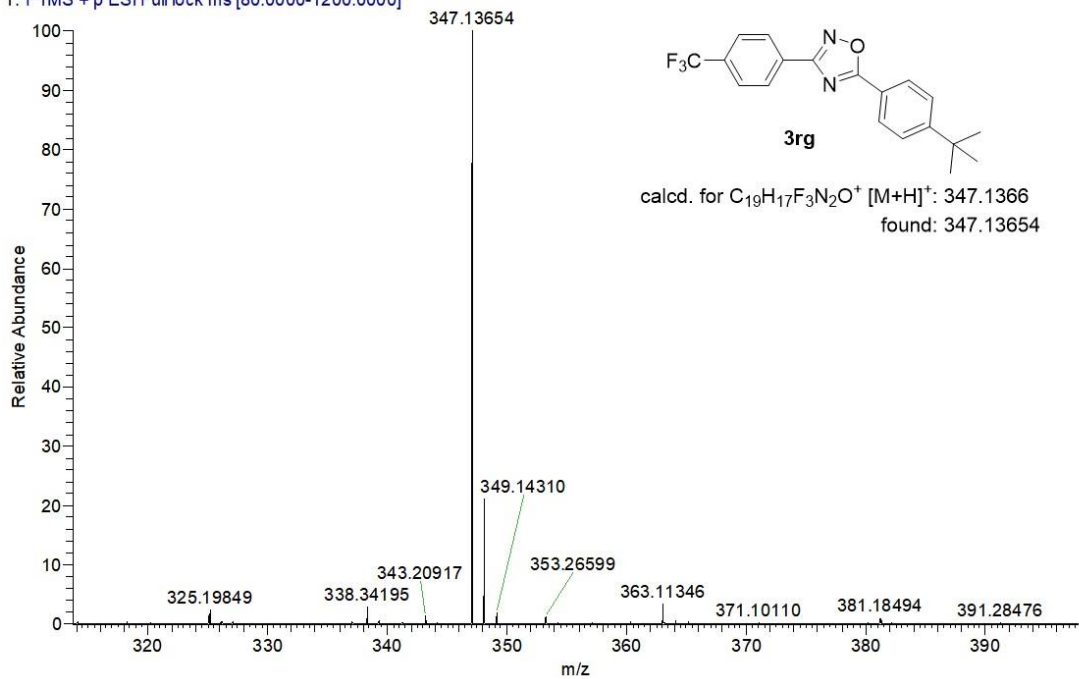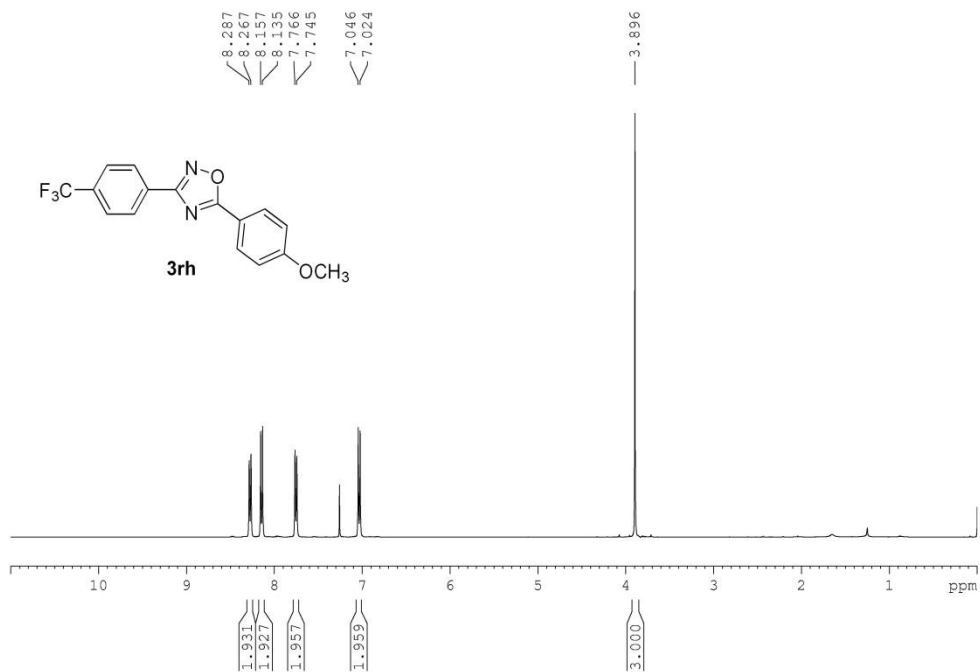

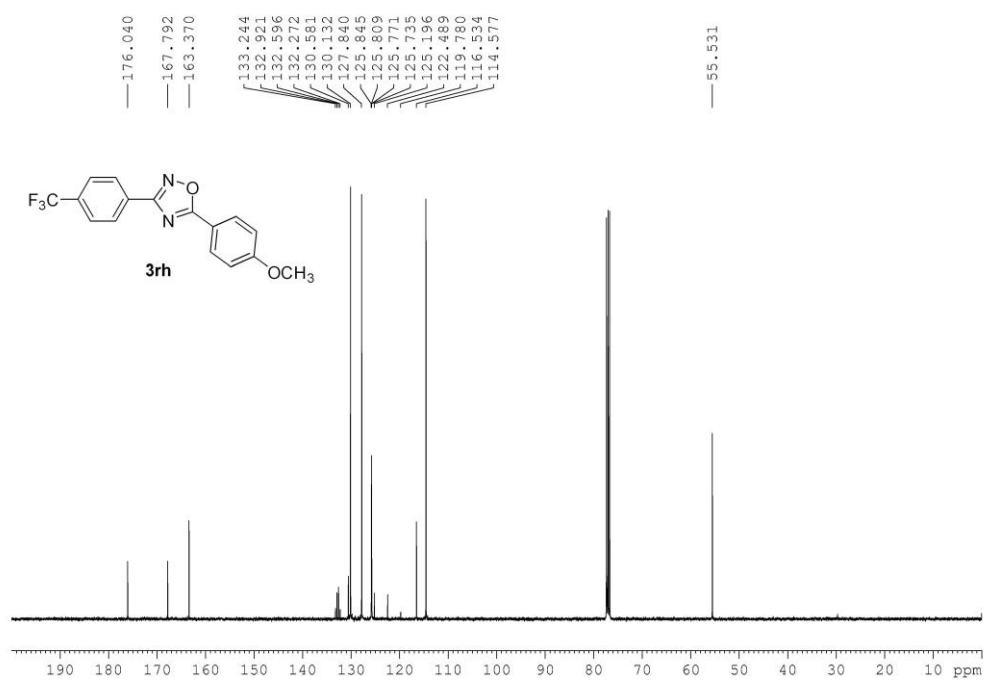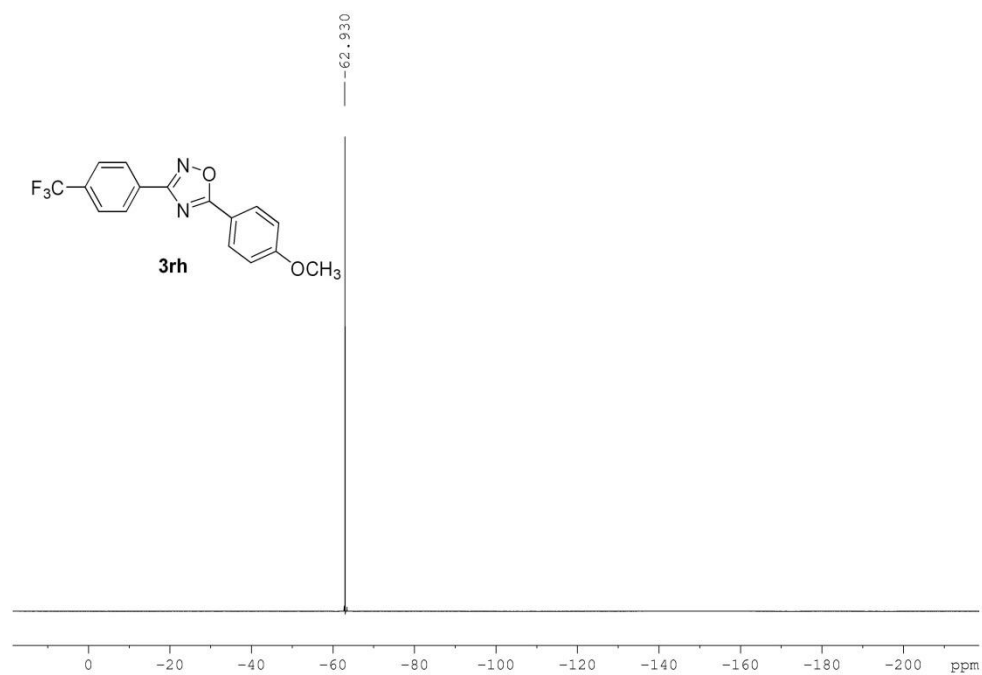

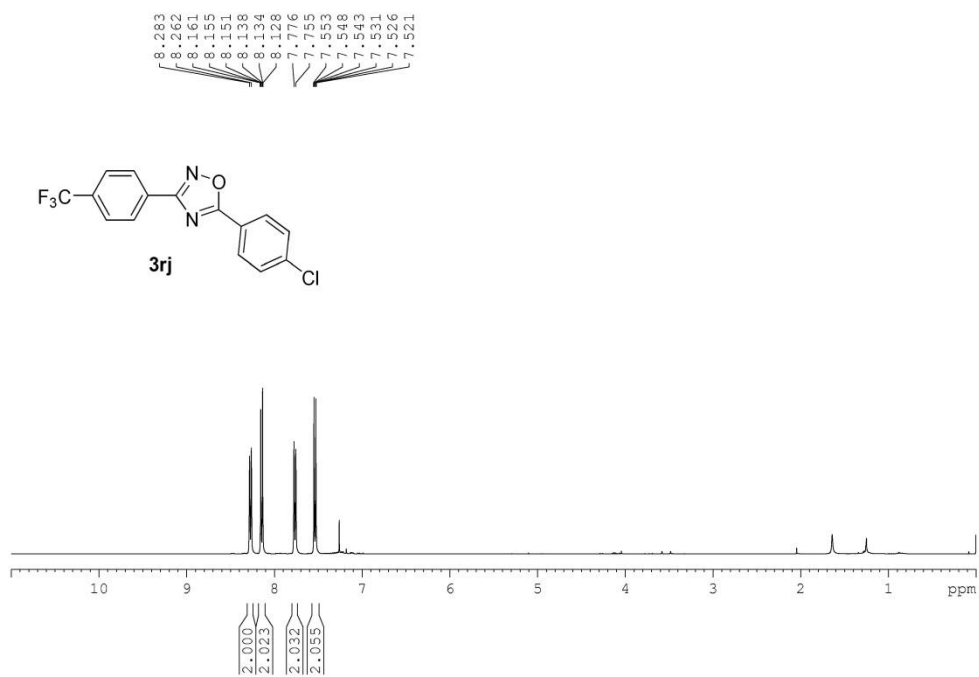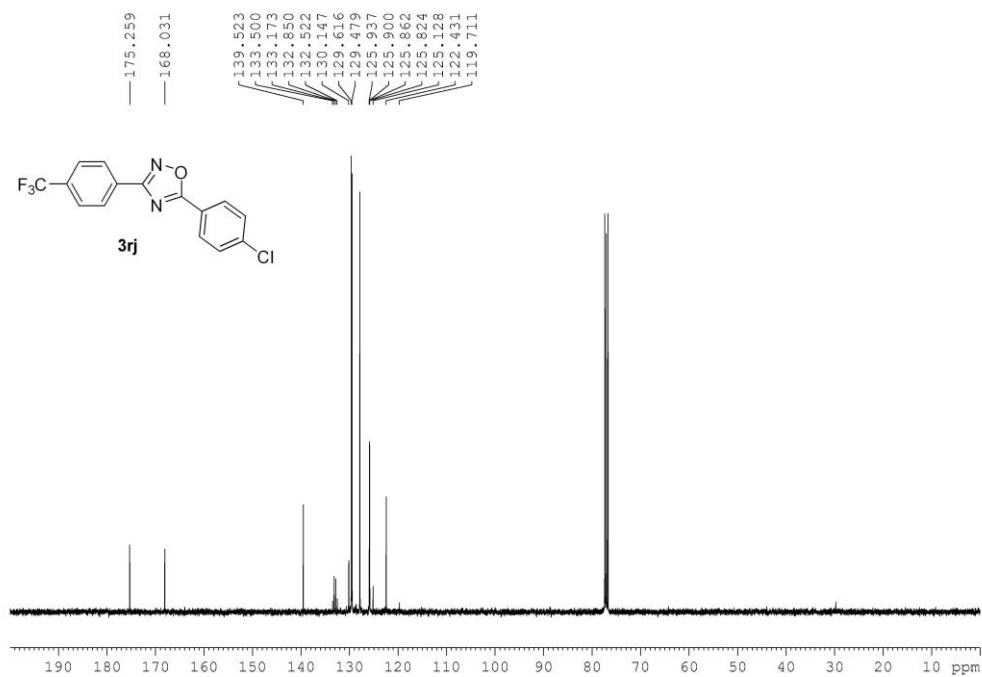

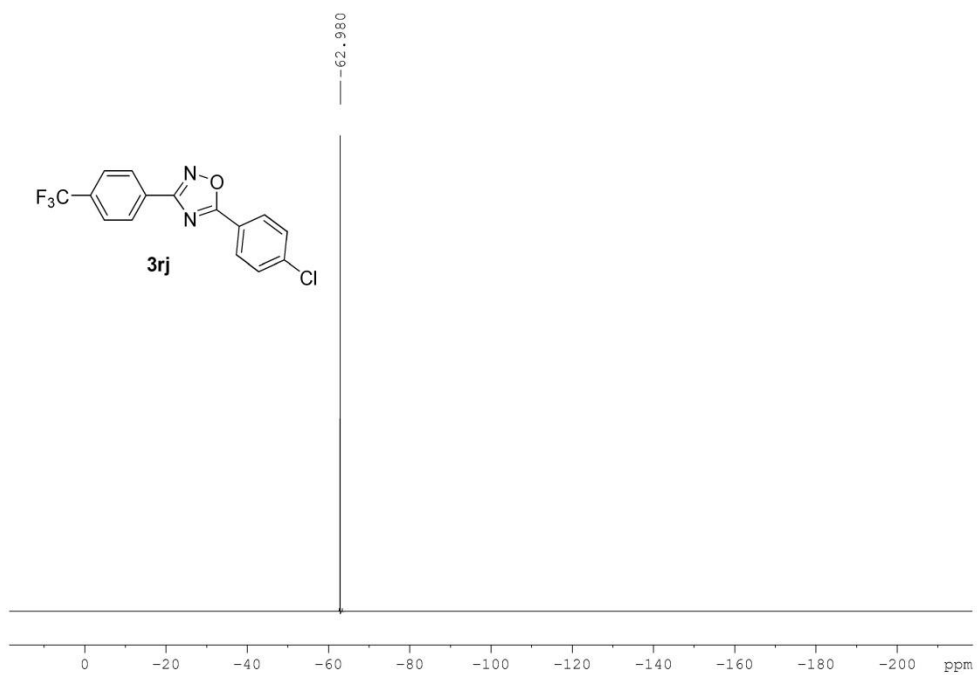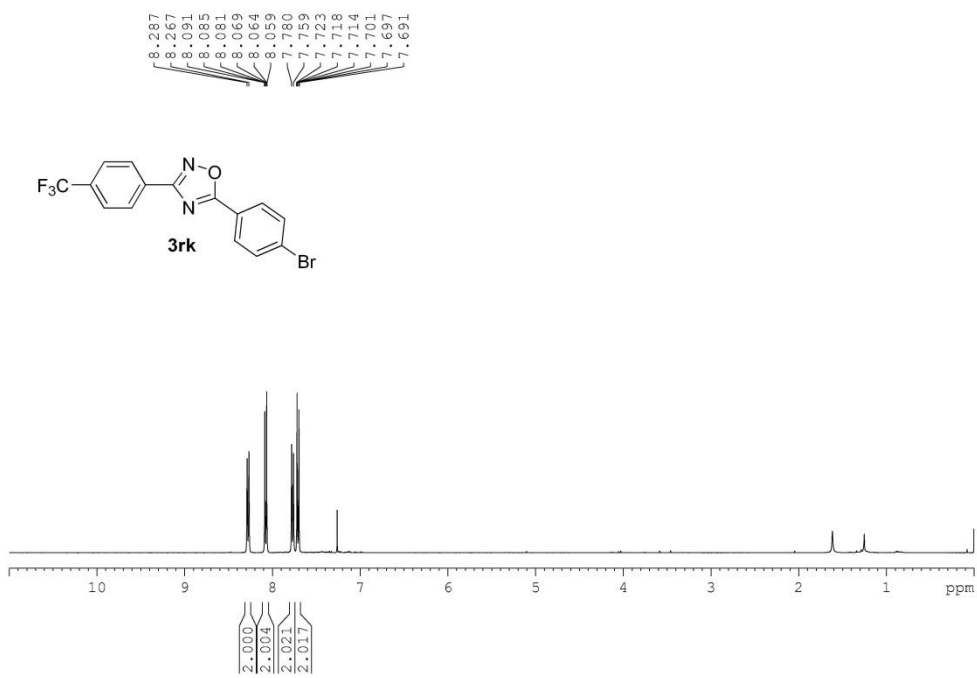

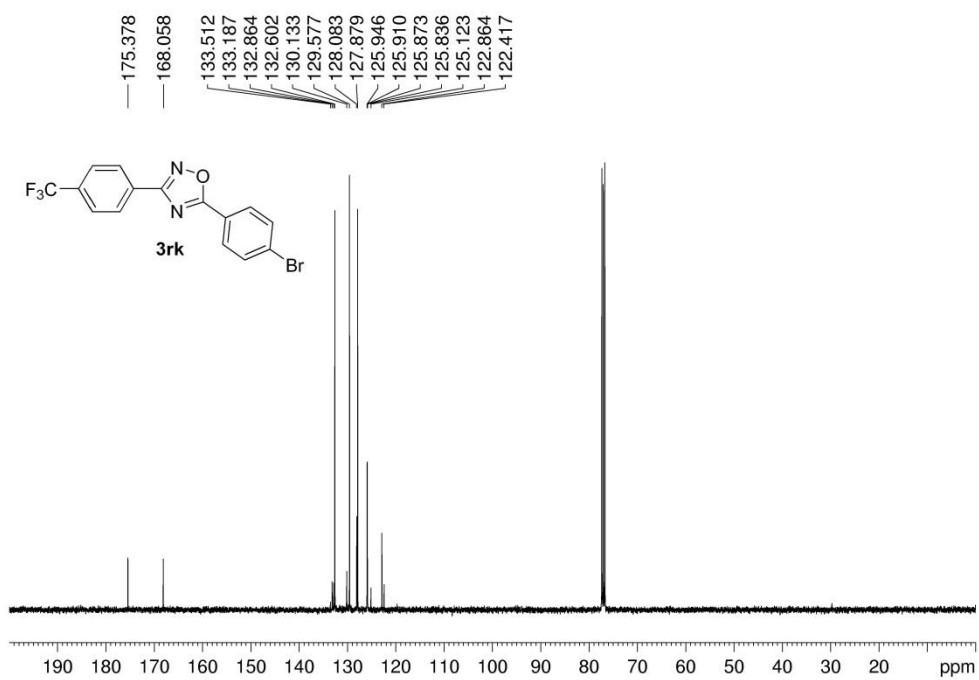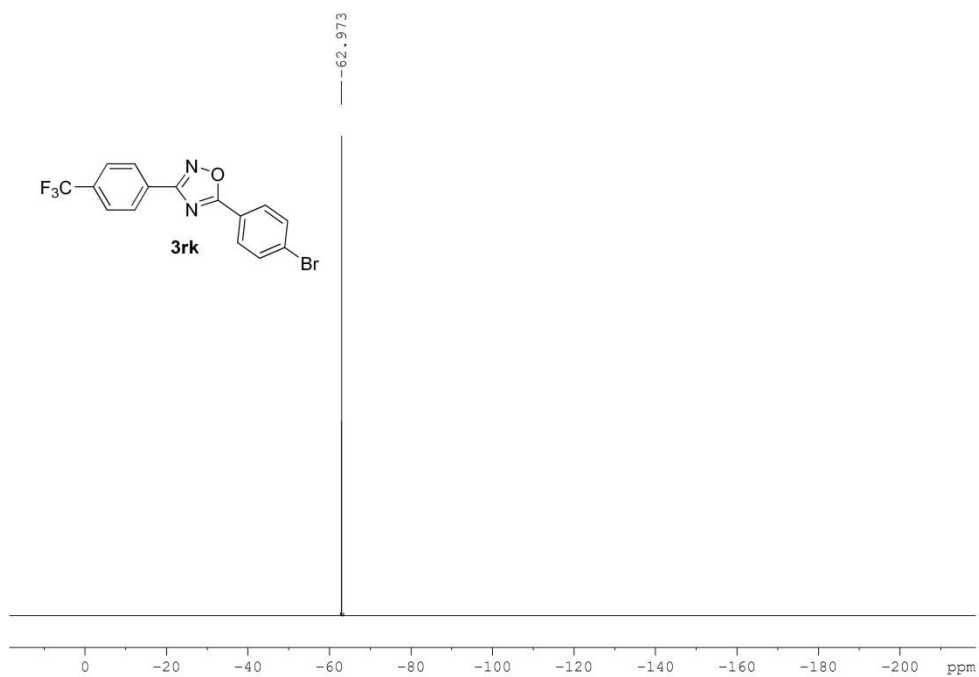

T: FTMS + p ESI Full lock ms [80.0000-1200.0000]

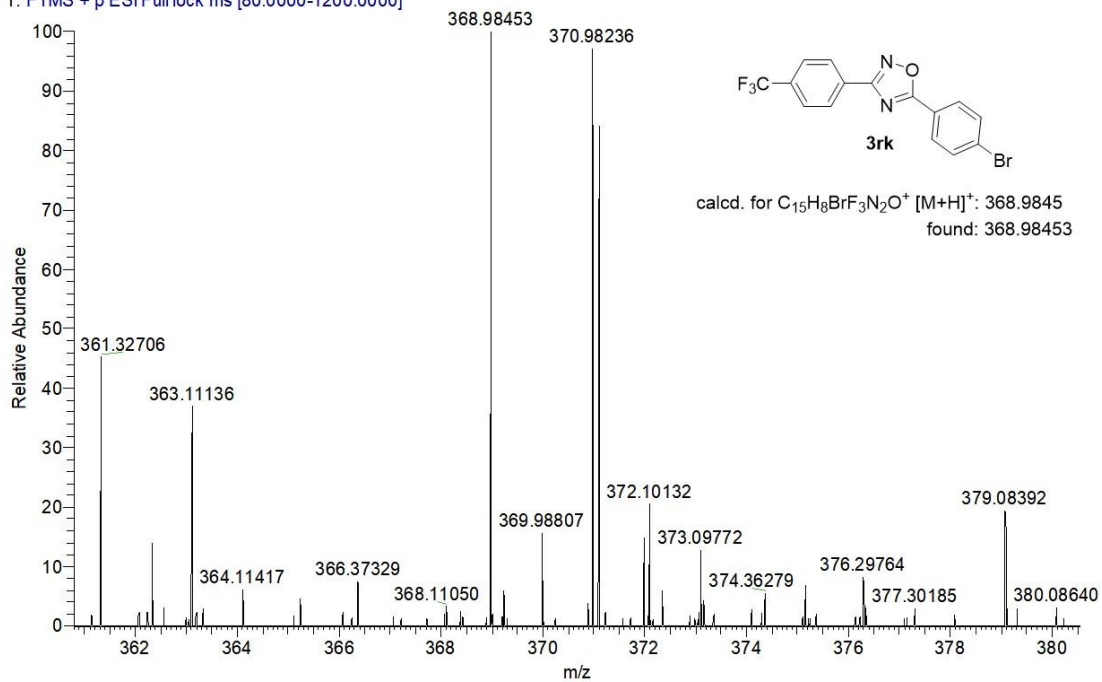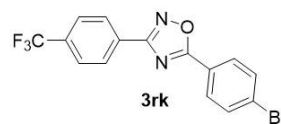

calcd. for  $C_{15}H_8BrF_3N_2O^+$   $[M+H]^+$ : 368.9845  
found: 368.98453

8.300  
8.279  
7.778  
7.757  
7.744  
7.741  
7.410  
7.402  
6.679  
6.671  
6.666

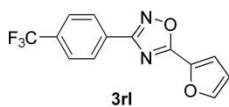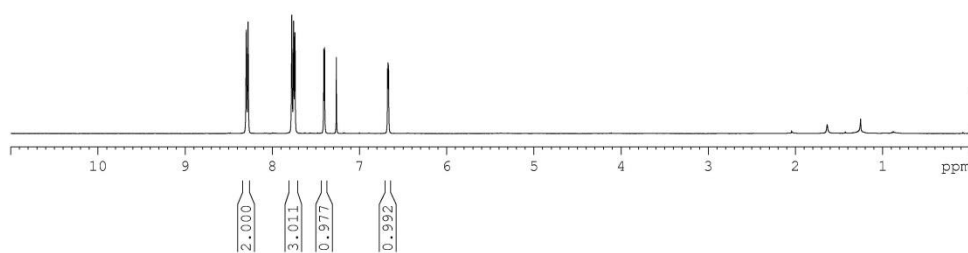



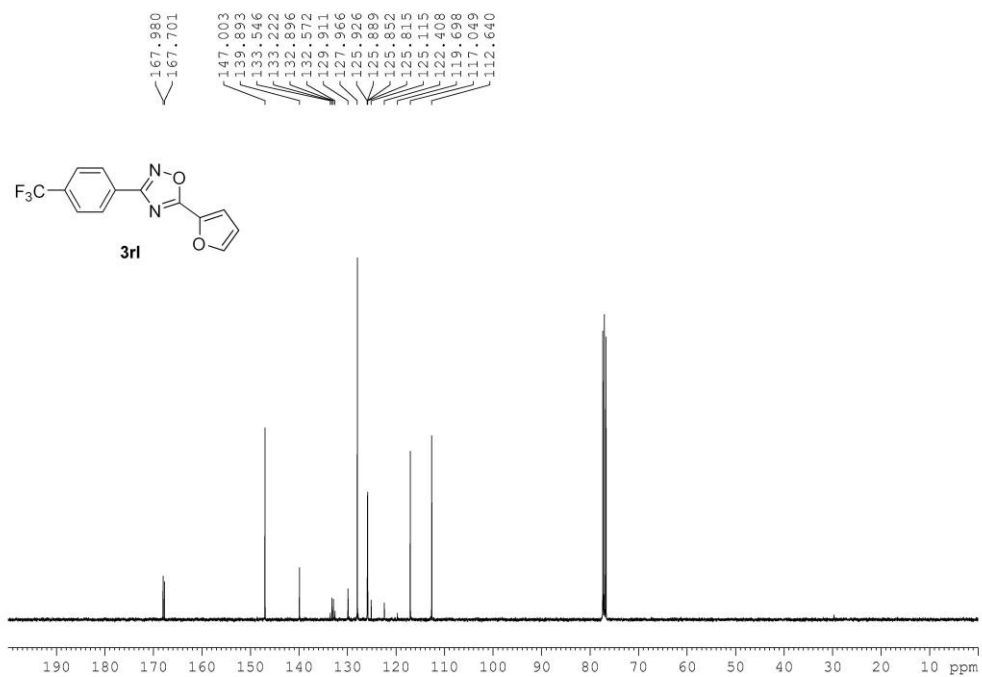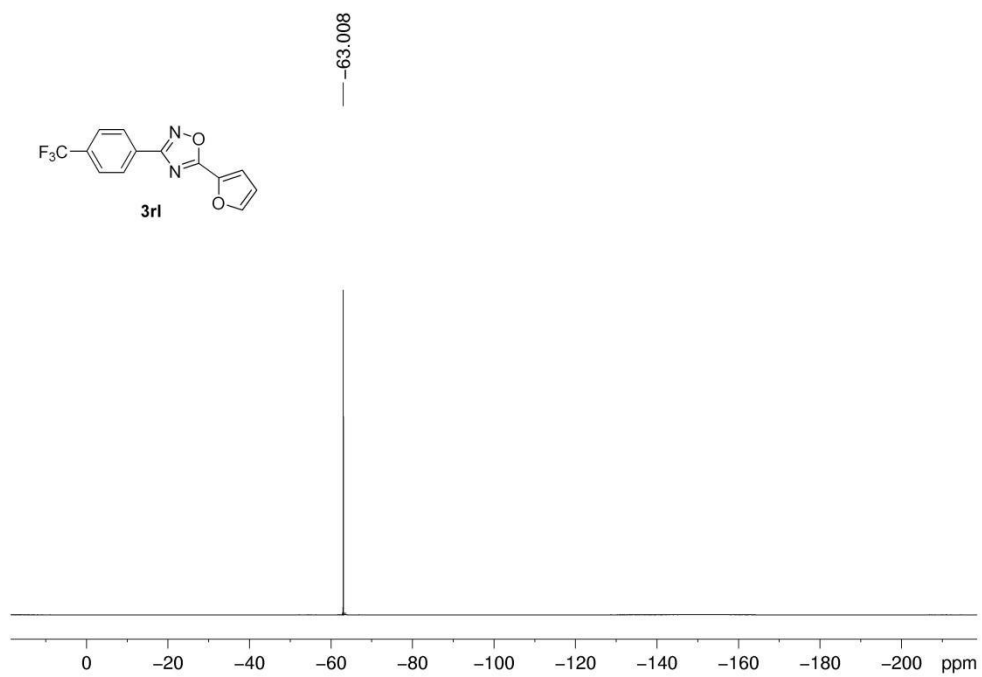

I: FTMS + p ESI Full lock ms [80.0000-1200.0000]

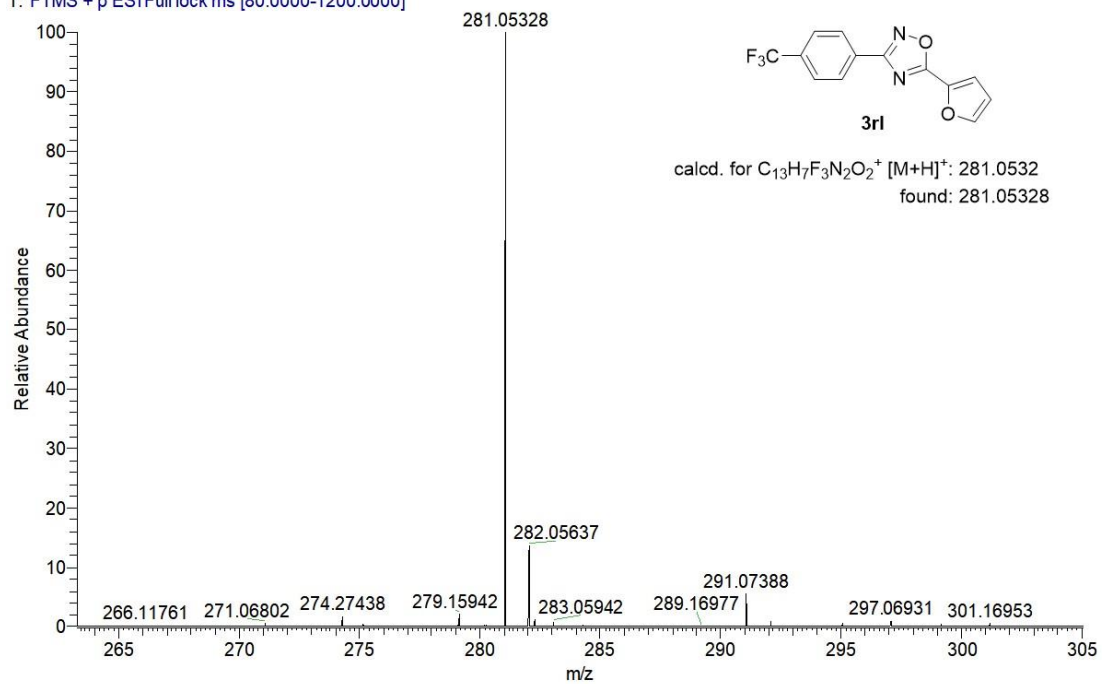

## 6. References

- [1] J. C. P. Mayer, T. V. Acunha, O. E. D. Rodrigues, D. F. Back, O. A. Chaves, L. Dornelles, B. A. Iglesias, *New J. Chem.*, 2021, **45**, 471-484.
- [2] W. Wang, H. Xu, Y. Q. Xu, T. Ding, W. K. Zhang, Y. R. Ren and H. B. Chang, *Org. Biomol. Chem.*, 2016, **14**, 9814-9822.
- [3] H. A. Swarup, N. Chaithra, K. Mantelingu, K. S. Rangappa, *ChemistrySelect*, 2018, **3**, 5390-5394.
- [4] S. Kandrea, P. R. Bhagatb, R. Sharmaa, A. Gupte, *Tetrahedron Lett.*, 2013, **54**, 3526-3529.
- [5] C. Wang, X. Y. Rui, D. J. Si, R. P. Dai, Y. Y. Zhu, H. M. Wen, W. Li and J. Liu, *Adv. Synth. Catal.*, 2021, **363**, 1-10.
- [6] Y. Zhang, C. J. Wu, X. Y. Wan, C. D. Wan, *J. Heterocycl. Chem.*, 2021, **58**, 1-11.
- [7] A. Savateev, N. V. Tarakina, V. Strauss, T. Hussain, K. T. Brummelhuis, J. M. S. Vadillo, Y. Markushyna, S. Mazzanti, A. P. Tyutyunnik, R. Walczak, M. Oschatz, D. Guldi, A. Karton and M. Antonietti, *Angew. Chem. Int. Ed.*, 2020, **59**, 15061-15068.
- [8] C. Jiang, M. F. Li, L. T. Xu, Y. J. Yi, J. Ye and A. X. Hu, *Org. Biomol. Chem.*, 2021, **19**, 10611-10616.
- [9] M. R. Kuram, W. G. Kim, K. Myung, and S. Y. Hong, *Eur. J. Org. Chem.*, 2016, **2016**, 438-442.
- [10] A. A. Shetneva, V. E. Pankratievab, A. S. Kunichkinab, A. S. Vlasova, I. K. Proskurinab, A. D. Kotovb and M. K. Korsakova, *Russ. J. Org. Chem.*, 2020, **56**, 1181-1186.
- [11] P. D. Parker, J. G. Pierce, *Synthesis*, 2016, **48**, 1902-1909.
- [12] T. Ramu, S. Prasanthi, N. Mangarao, G. M. Basha, R. Srinuvasarao, and V. Siddaiah, *Chem. Lett.*, 2013, **42**, 722-724.
- [13] E. Li, M. Wang, Z. Wang, W. Q. Yu and J. B. Chang, *Tetrahedron*, 2018, **74**, 4613-4618.
- [14] M. Zarei, *ChemistrySelect*, 2018, **3**, 11273-11276.
- [15] M. Adib, A. H. Jahromi, N. Tavoosi, M. Mahdavia and H. R. Bijanzadeh, *Tetrahedron Lett.*, 2006, **47**, 2965-2967.
- [16] S. Li, P. H. *Adv. Synth. Catal.*, 2017, **359**, 772-778.
- [17] M. Nakka, R. Tadikonda, S. Nakka and S. Vidavalur, *Adv. Synth. Catal.*, 2016, **358**: 520-525.
- [18] R. F. Poulain, A. L. Tartara and B. P. De préz, *Tetrahedron Lett.*, 2001, **42**, 1495-1498.
- [19] M. D. Evans, J. Ring, A. Schoen, A. Bell, P. Edwards, D. Berthelot, R. Nicawonger and C. M. Baldino, *Tetrahedron Lett.*, 2003, **44**: 9337-9341.
